# Supplementary material for: Is Transcriptomic Regulation of Berry Development More Important at Night than During the Day?
Source: PubMed Central journal article supplement (PMC3923830; doi:10.1371/journal.pone.0088844), 2014-02-13

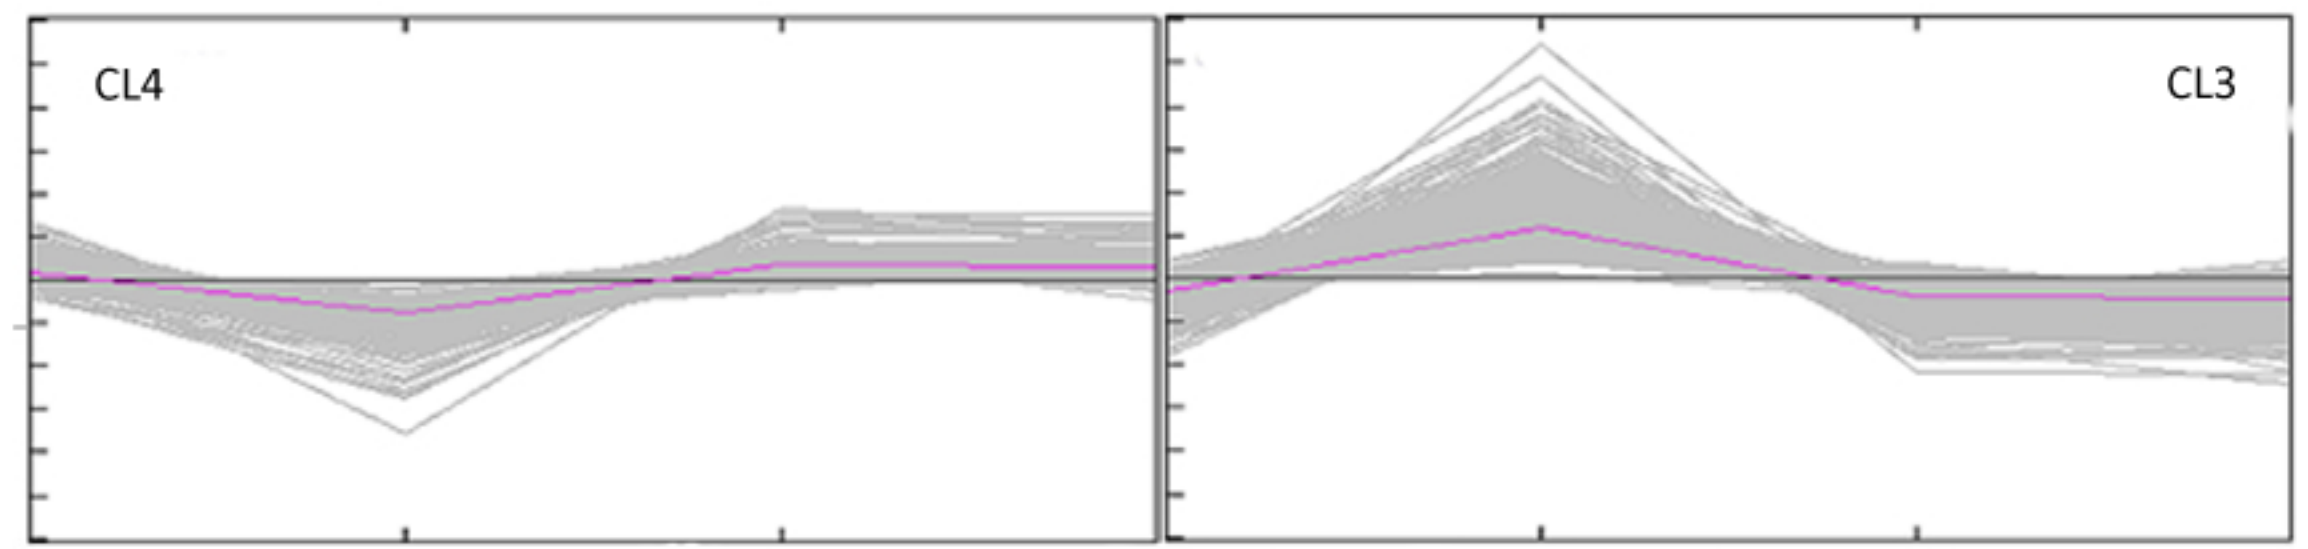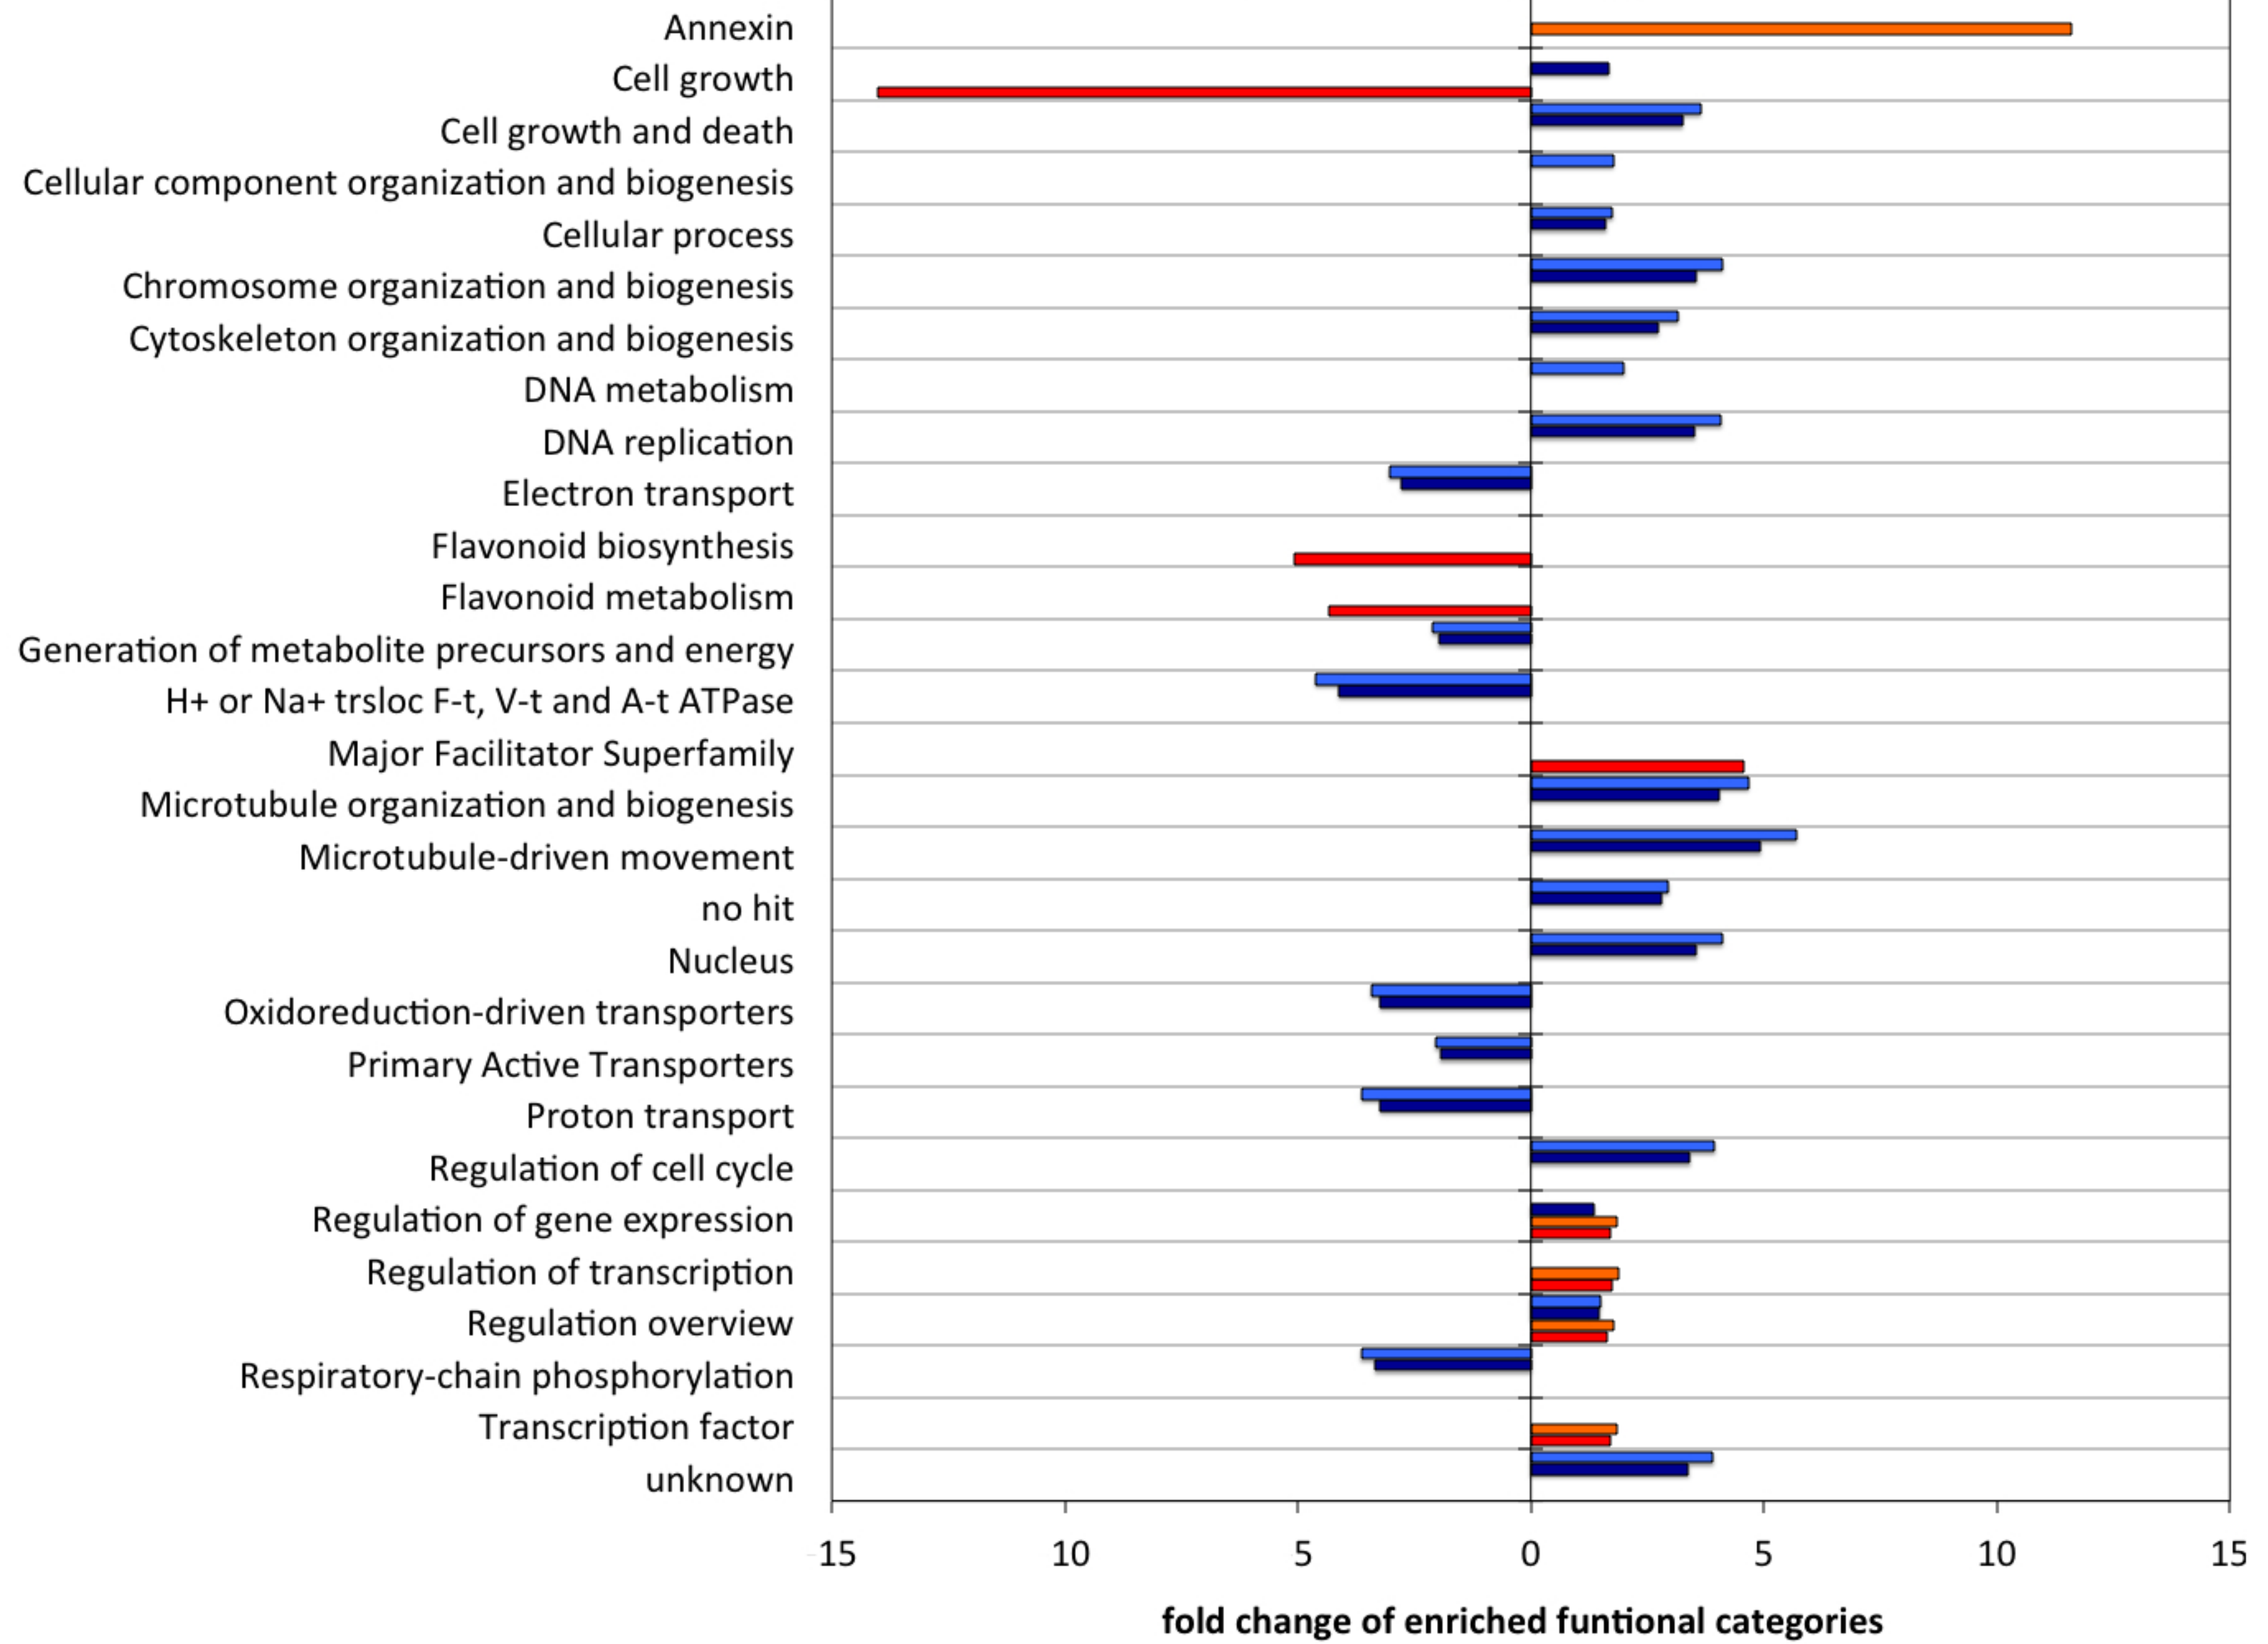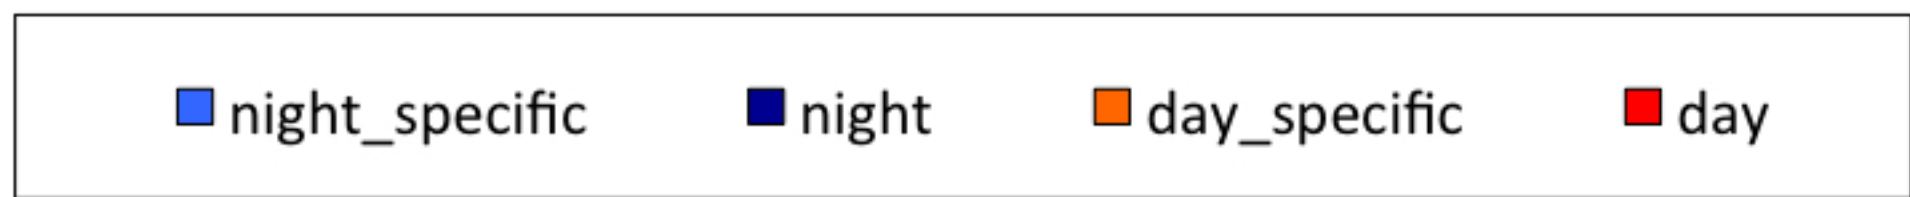

Supplement: pone.0088844.s002.pdf [file pone.0088844.s002.pdf]
