# Supplementary material for: Is Transcriptomic Regulation of Berry Development More Important at Night than During the Day?
Source: PLoS One. 2014 Feb 13;9(2):e88844. doi: 10.1371/journal.pone.0088844 (PMC3923830; doi:10.1371/journal.pone.0088844)
Supplement: Table S5 — Transcripts allocated to clusters. (XLSX) [file pone.0088844.s010.xlsx]

## Sheet: Récupéré_Feuil1
Unique_ID	Functional_Annotation	Cluster_Day	Cluster_Night	Functionnal category 1	Functionnal category 2	Functionnal category 3	Functionnal category 4	Functionnal category 5	Functionnal category 6	Functionnal category 7	Functionnal category 8
VIT_00s0120g00100	Asparaginyl-tRNA synthetase	Cluster 1; R_up_day	Cluster 1; R_up_night	Metabolism.Primary metabolism.Amino acid metabolism.Alanine and aspartate metabolism	Metabolism.Primary metabolism.Nucleobase, nucleoside, nucleotide, nucleic acid metabolism.Nucleic acid metabolism.RNA metabolism.tRNA metabolism.tRNA processing	Metabolism.Primary metabolism.Protein metabolism and modification.Protein synthesis.Translation.Amino acid activation
VIT_00s0120g00280	No hit	Cluster 1; R_up_day	Cluster 1; R_up_night	No hit
VIT_00s0125g00090	Leucine-rich repeat protein kinase	Cluster 1; R_up_day	Cluster 1; R_up_night	Signaling.Signaling pathway.Protein kinase
VIT_00s0125g00190	Potassium transporter (KUP1)	Cluster 1; R_up_day	Cluster 1; R_up_night	Transport overview.Electrochemical Potential-driven Transporters.Porters.K+ uptake porter (aka permease)	Transport overview.Ion transport.Cation transport.Potassium transport
VIT_00s0125g00210	Serine/theronine protein kinase 2	Cluster 1; R_up_day	Cluster 1; R_up_night	Signaling.Signaling pathway.Protein kinase
VIT_00s0125g00230	No hit	Cluster 1; R_up_day	Cluster 1; R_up_night	No hit
VIT_00s0125g00300	No hit	Cluster 1; R_up_day	Cluster 1; R_up_night	No hit
VIT_00s0125g00320	No hit	Cluster 1; R_up_day	Cluster 1; R_up_night	No hit
VIT_00s0125g00330	TET10 (tetraspanin10)	Cluster 1; R_up_day	Cluster 1; R_up_night	Development.Senescence
VIT_00s0125g00340	TET10 (tetraspanin10)	Cluster 1; R_up_day	Cluster 1; R_up_night	Development.Senescence
VIT_00s0125g00350	Proteasome 26S regulatory subunit (RPN2)	Cluster 1; R_up_day	Cluster 1; R_up_night	Metabolism.Primary metabolism.Protein metabolism and modification.Proteolysis.cytoplasmic and nuclear protein degradation.Ubiquitin-mediated proteolysis.Proteasome
VIT_00s0125g00380	No hit	Cluster 1; R_up_day	Cluster 1; R_up_night	No hit
VIT_00s0131g00250	Heat shock protein 81-2 (HSP81-2)	Cluster 1; R_up_day	Cluster 1; R_up_night	Metabolism.Primary metabolism.Protein metabolism and modification.Protein folding.Chaperone-mediated protein folding.HSP-mediated protein folding	Response to stimulus.Stress response.Biotic stress response.Plant-pathogen interaction	Metabolism.Primary metabolism.Protein metabolism and modification.Protein processing in endoplasmic reticulum
VIT_00s0131g00280	C2 domain-containing protein	Cluster 1; R_up_day	Cluster 1; R_up_night	Signaling.Signaling pathway.Protein kinase
VIT_00s0145g00110	Pirin	Cluster 1; R_up_day	Cluster 1; R_up_night	Unknown
VIT_00s0153g00080	Adaptor-related protein complex 4	Cluster 1; R_up_day	Cluster 1; R_up_night	Transport overview.Macromolecule transport.Protein transport.Protein coat	Cellular process.Cellular transport.Protein trafficking.Vesicle-mediated trafficking
VIT_00s0160g00250	No hit	Cluster 1; R_up_day	Cluster 1; R_up_night	No hit
VIT_00s0174g00230	Zinc finger (FYVE type)	Cluster 1; R_up_day	Cluster 1; R_up_night	Development.Reproductive development.Flower development	Regulation overview.Regulation of gene expression.Regulation of transcription.Transcription factor.PHD family transcription factor	Metabolism.Primary metabolism.Protein metabolism and modification.Protein modification.Protein SUMOylation
VIT_00s0179g00250	No hit	Cluster 1; R_up_day	Cluster 1; R_up_night	No hit
VIT_00s0179g00370	ESCRT-I complex subunit TSG101	Cluster 1; R_up_day	Cluster 1; R_up_night	Transport overview.Macromolecule transport.Protein transport.Tethering factors	Cellular process.Cellular transport.Protein trafficking
VIT_00s0181g00080	F-box domain containing protein	Cluster 1; R_up_day	Cluster 1; R_up_night	Metabolism.Primary metabolism.Protein metabolism and modification.Proteolysis.cytoplasmic and nuclear protein degradation.Ubiquitin-mediated proteolysis
VIT_00s0181g00090	WD-repeat protein	Cluster 1; R_up_day	Cluster 1; R_up_night	Unknown
VIT_00s0183g00010	Actin 7 (ACT7) / actin 2	Cluster 1; R_up_day	Cluster 1; R_up_night	Cellular process.Cellular component organization and biogenesis.Cytoskeleton organization and biogenesis.Actin organization and biogenesis
VIT_00s0183g00040	Importin alpha	Cluster 1; R_up_day	Cluster 1; R_up_night	Transport overview.Incompletely characterized transport systems.Recognized transporters of unknown biochemical mechanism.Nuclear pore complex	Transport overview.Nucleocytoplasmic transport.Nuclear pore complex	Transport overview.Macromolecule transport.Protein transport.Protein import into nucleus	Transport overview.Nucleocytoplasmic transport
VIT_00s0184g00100	Pyruvate kinase	Cluster 1; R_up_day	Cluster 1; R_up_night	Metabolism.Primary metabolism.Carbohydrate metabolism.Glycolysis Gluconeogenesis.Glycolysis	Metabolism.Primary metabolism.Nucleobase, nucleoside, nucleotide, nucleic acid metabolism.Nucleotide metabolism.Purine metabolism	Metabolism.Primary metabolism.Carbohydrate metabolism.Monosaccharide metabolism.Pyruvate metabolism	Metabolism.Primary metabolism.Carbon fixation
VIT_00s0184g00130	R protein L6	Cluster 1; R_up_day	Cluster 1; R_up_night	Response to stimulus.Stress response.Biotic stress response.Plant-pathogen interaction.R proteins from Plant-pathogen interaction
VIT_00s0186g00010	Hexaprenyldihydroxybenzoate methyltransferase	Cluster 1; R_up_day	Cluster 1; R_up_night	Metabolism.Primary metabolism.Coenzyme and prosthetic group metabolism.Biosynthesis of derivatives of dehydroquinic acid, shikimic acid and chorismic acid.Ubiquinone biosynthesis	Metabolism.Secondary metabolism.Terpenoid metabolism.Terpenoid biosynthesis.Terpenoid-quinone biosynthesis
VIT_00s0186g00100	Cell cycle checkpoint protein	Cluster 1; R_up_day	Cluster 1; R_up_night	Metabolism.Primary metabolism.Nucleobase, nucleoside, nucleotide, nucleic acid metabolism.Nucleic acid metabolism.DNA metabolism.DNA recombination and repair.repair
VIT_00s0187g00120	Cystatin	Cluster 1; R_up_day	Cluster 1; R_up_night	Metabolism.Primary metabolism.Protein metabolism and modification.Proteolysis.Protease inhibition
VIT_00s0187g00140	Photosystem II 44 kDa reaction center psbC	Cluster 1; R_up_day	Cluster 1; R_up_night	Metabolism.Primary metabolism.Generation of metabolite precursors and energy.Photosynthesis.Photosystem II	Transport overview.Primary Active Transporters.Light absorption-driven transporters.Photosynthetic Reaction Center
VIT_00s0187g00280	Cellulase	Cluster 1; R_up_day	Cluster 1; R_up_night	Cellular process.Cellular component organization and biogenesis.Cell wall organization and biogenesis.Cell wall metabolism.Cell wall catabolism.Cellulose catabolism
VIT_00s0187g00310	V-type H+-transporting ATPase subunit H	Cluster 1; R_up_day	Cluster 1; R_up_night	Metabolism.Primary metabolism.Generation of metabolite precursors and energy.Electron transport.Respiratory-chain phosphorylation	Transport overview.Primary Active Transporters.P-P-bond hydrolysis-driven transporters.H+ or Na+ trsloc F-t, V-t and A-t ATPase	Transport overview.Ion transport.Cation transport.Proton transport	Cellular process.Cellular transport.Protein trafficking.Vesicle-mediated trafficking.Phagosome
VIT_00s0188g00070	Phospholipid-transporting ATPase	Cluster 1; R_up_day	Cluster 1; R_up_night	Transport overview.Primary Active Transporters.P-P-bond hydrolysis-driven transporters.P-type ATPase (P-ATPase).phospholipid transporting	Transport overview.Macromolecule transport.Lipid transport
VIT_00s0188g00110	Glucose-inhibited division family A	Cluster 1; R_up_day	Cluster 1; R_up_night	Cellular process.Cell growth and death
VIT_00s0192g00100	No hit	Cluster 1; R_up_day	Cluster 1; R_up_night	No hit
VIT_00s0192g00120	FtsH protease 4 ftsh4	Cluster 1; R_up_day	Cluster 1; R_up_night	Cellular process.Cellular component organization and biogenesis.Organelle organization and biogenesis.Plastid organization and biogenesis	Metabolism.Primary metabolism.Protein metabolism and modification.Proteolysis.Peptidase-mediated proteolysis.Metallopeptidase-mediated proteolysis
VIT_00s0194g00110	4-nitrophenylphosphatase	Cluster 1; R_up_day	Cluster 1; R_up_night	Metabolism.Primary metabolism.Generation of metabolite precursors and energy.Glyoxylate and dicarboxylate metabolism
VIT_00s0199g00170	Cysteine desulfurase	Cluster 1; R_up_day	Cluster 1; R_up_night	Metabolism.Primary metabolism.Coenzyme and prosthetic group metabolism.Thiamine metabolism.Thiamine biosynthesis	Metabolism.Cellular metabolism.Nitrogen and sulfur metabolism.Sulfur metabolism.Assimilatory reduction of sulfur
VIT_00s0201g00080	No hit	Cluster 1; R_up_day	Cluster 1; R_up_night	No hit
VIT_00s0202g00080	No hit	Cluster 1; R_up_day	Cluster 1; R_up_night	No hit
VIT_00s0203g00180	Unknown protein	Cluster 1; R_up_day	Cluster 1; R_up_night	Unknown
VIT_00s0203g00200	Universal stress protein (USP) family protein	Cluster 1; R_up_day	Cluster 1; R_up_night	Response to stimulus.Stress response
VIT_00s0203g00210	Zinc finger (B-box type)	Cluster 1; R_up_day	Cluster 1; R_up_night	Regulation overview.Regulation of gene expression.Regulation of transcription.Transcription factor.Zinc finger B-box family transcription factor
VIT_00s0203g00220	S-locus lectin protein kinase	Cluster 1; R_up_day	Cluster 1; R_up_night	Signaling.Signaling pathway.Protein kinase
VIT_00s0207g00020	Unknown protein	Cluster 1; R_up_day	Cluster 1; R_up_night	Unknown
VIT_00s0207g00050	No hit	Cluster 1; R_up_day	Cluster 1; R_up_night	No hit
VIT_00s0207g00060	Unknown protein	Cluster 1; R_up_day	Cluster 1; R_up_night	Unknown
VIT_00s0207g00280	WAK receptor protein kinase	Cluster 1; R_up_day	Cluster 1; R_up_night	Signaling.Signaling pathway.Protein kinase
VIT_00s0208g00050	Multidrug resistance-associated protein 3	Cluster 1; R_up_day	Cluster 1; R_up_night	Transport overview.Macromolecule transport.Multidrug transport.Multidrug ABC transport
VIT_00s0208g00070	No hit	Cluster 1; R_up_day	Cluster 1; R_up_night	No hit
VIT_00s0208g00100	Unknown	Cluster 1; R_up_day	Cluster 1; R_up_night	Unknown
VIT_00s0208g00130	CBL-interacting protein kinase 23	Cluster 1; R_up_day	Cluster 1; R_up_night	Signaling.Signaling pathway.Protein kinase
VIT_00s0214g00080	WD-40 repeat family protein / beige-related	Cluster 1; R_up_day	Cluster 1; R_up_night	Unknown
VIT_00s0214g00090	F-box protein PP2-B10 (Protein phloem protein 2-like B10)	Cluster 1; R_up_day	Cluster 1; R_up_night	Metabolism.Primary metabolism.Protein metabolism and modification.Proteolysis.cytoplasmic and nuclear protein degradation.Ubiquitin-mediated proteolysis
VIT_00s0214g00170	Actin-related protein 7	Cluster 1; R_up_day	Cluster 1; R_up_night	Cellular process.Cellular component organization and biogenesis.Cytoskeleton organization and biogenesis.Actin organization and biogenesis
VIT_00s0216g00050	No hit	Cluster 1; R_up_day	Cluster 1; R_up_night	No hit
VIT_00s0218g00180	Geranylgeranyl transferase type-2 beta subunit.	Cluster 1; R_up_day	Cluster 1; R_up_night	Metabolism.Primary metabolism.Lipid metabolism.Steroid metabolism.Steroid biosynthesis	Metabolism.Primary metabolism.Protein metabolism and modification.Protein modification.Protein farnesylation
VIT_00s0218g00210	Folate-biopterin transporter	Cluster 1; R_up_day	Cluster 1; R_up_night	Transport overview.Electrochemical Potential-driven Transporters.Porters.Folate-Biopterin Transporter
VIT_00s0222g00130	Disease resistance protein (CC-NBS-LRR class)	Cluster 1; R_up_day	Cluster 1; R_up_night	Diverse functions.Gene family with diverse functions.NBS-LRR superfamily	Response to stimulus.Stress response.Biotic stress response
VIT_00s0225g00010	Unknown protein	Cluster 1; R_up_day	Cluster 1; R_up_night	Unknown
VIT_00s0225g00060	MATE efflux family protein	Cluster 1; R_up_day	Cluster 1; R_up_night	Transport overview.Electrochemical Potential-driven Transporters.Porters.Multidrug/Oligosaccharidyl-lipid/Polysaccharide Flippase.Multi Antimicrobial Extrusion	Transport overview.Macromolecule transport.Multidrug transport
VIT_00s0225g00180	Salt- and drought-induced ring finger1	Cluster 1; R_up_day	Cluster 1; R_up_night	Regulation overview.Regulation of gene expression.Regulation of transcription.Transcription factor.Zinc finger C3HC4 family transcription factor
VIT_00s0225g00230	Alliin lyase precursor	Cluster 1; R_up_day	Cluster 1; R_up_night	Metabolism.Primary metabolism.Amino acid metabolism.Cysteine metabolism	Metabolism.Cellular metabolism.Nitrogen and sulfur metabolism.Sulfur metabolism.Sulfur compound metabolism	Response to stimulus.Stress response.Biotic stress response
VIT_00s0227g00130	A/G-specific adenine glycosylase	Cluster 1; R_up_day	Cluster 1; R_up_night	Metabolism.Primary metabolism.Nucleobase, nucleoside, nucleotide, nucleic acid metabolism.Nucleic acid metabolism.DNA metabolism.DNA recombination and repair.repair.Base excision repair
VIT_00s0230g00050	Heat shock protein binding	Cluster 1; R_up_day	Cluster 1; R_up_night	Metabolism.Primary metabolism.Protein metabolism and modification.Protein folding
VIT_00s0231g00070	Auxin-responsive protein	Cluster 1; R_up_day	Cluster 1; R_up_night	Signaling.Hormone Signaling.Auxin Signaling.Auxin-mediated Signaling pathway
VIT_00s0233g00030	Trehalose-6-phosphate phosphatase	Cluster 1; R_up_day	Cluster 1; R_up_night	Metabolism.Primary metabolism.Carbohydrate metabolism.Polysaccharide metabolism.Starch and sucrose metabolism	Metabolism.Primary metabolism.Carbohydrate metabolism.Oligosaccharide metabolism.Trehalose metabolism
VIT_00s0233g00070	No hit	Cluster 1; R_up_day	Cluster 1; R_up_night	No hit
VIT_00s0233g00170	flavin-containing monooxygenase 3	Cluster 1; R_up_day	Cluster 1; R_up_night	Metabolism.single reactions	Metabolism.Cellular metabolism.Oxidation reduction.Flavin-containing monooxygenase
VIT_00s0233g00180	flavin-containing monooxygenase 3	Cluster 1; R_up_day	Cluster 1; R_up_night	Metabolism.single reactions	Metabolism.Cellular metabolism.Oxidation reduction.Flavin-containing monooxygenase
VIT_00s0238g00090	TIR-NBS-LRR disease resistance	Cluster 1; R_up_day	Cluster 1; R_up_night	Diverse functions.Gene family with diverse functions.NBS-LRR superfamily
VIT_00s0239g00010	CTV.22	Cluster 1; R_up_day	Cluster 1; R_up_night	Unknown
VIT_00s0239g00020	AML1 (arabidopsis mei2-like protein 1)	Cluster 1; R_up_day	Cluster 1; R_up_night	Cellular process.Cell growth and death	Regulation overview.Regulation of cell cycle
VIT_00s0239g00140	Mei2 AML4	Cluster 1; R_up_day	Cluster 1; R_up_night	Cellular process.Cell growth and death
VIT_00s0239g00150	CTV.22	Cluster 1; R_up_day	Cluster 1; R_up_night	Unknown
VIT_00s0240g00060	No hit	Cluster 1; R_up_day	Cluster 1; R_up_night	No hit
VIT_00s0245g00060	No hit	Cluster 1; R_up_day	Cluster 1; R_up_night	No hit
VIT_00s0245g00070	Heptaprenyl diphosphate synthase component II	Cluster 1; R_up_day	Cluster 1; R_up_night	Metabolism.Primary metabolism.Lipid metabolism.Steroid metabolism.Steroid biosynthesis	Metabolism.Secondary metabolism.Terpenoid metabolism.Terpenoid biosynthesis
VIT_00s0250g00060	Retrotransposon protein	Cluster 1; R_up_day	Cluster 1; R_up_night	Transposable elements viral and plasmid proteins.Protein from transposable element
VIT_00s0251g00080	No hit	Cluster 1; R_up_day	Cluster 1; R_up_night	No hit
VIT_00s0252g00040	Cytokinin oxidase	Cluster 1; R_up_day	Cluster 1; R_up_night	Signaling.Hormone Signaling.Cytokinin Signaling.Cytokinin metabolism.Cytokinin catabolism
VIT_00s0254g00010	Unknown	Cluster 1; R_up_day	Cluster 1; R_up_night	Unknown
VIT_00s0256g00060	Unknown	Cluster 1; R_up_day	Cluster 1; R_up_night	Unknown
VIT_00s0258g00020	Receptor serine/threonine kinase	Cluster 1; R_up_day	Cluster 1; R_up_night	Signaling.Signaling pathway.Protein kinase
VIT_00s0258g00060	Receptor-like kinase ARK1AS	Cluster 1; R_up_day	Cluster 1; R_up_night	Signaling.Signaling pathway.Protein kinase
VIT_00s0258g00070	Receptor-like kinase ARK1AS	Cluster 1; R_up_day	Cluster 1; R_up_night	Signaling.Signaling pathway.Protein kinase
VIT_00s0258g00130	Receptor kinase homolog LRK10	Cluster 1; R_up_day	Cluster 1; R_up_night	Signaling.Signaling pathway.Protein kinase
VIT_00s0258g00140	Brassinosteroid insensitive 1-associated receptor kinase 1	Cluster 1; R_up_day	Cluster 1; R_up_night	Signaling.Hormone Signaling.Brassinosteroid Signaling.Brassinosteroid-mediated Signaling pathway	Response to stimulus.Stress response.Biotic stress response.Plant-pathogen interaction
VIT_00s0261g00050	No hit	Cluster 1; R_up_day	Cluster 1; R_up_night	No hit
VIT_00s0262g00020	Receptor kinase RK20-1	Cluster 1; R_up_day	Cluster 1; R_up_night	Signaling.Signaling pathway.Protein kinase
VIT_00s0262g00150	Glycine-rich protein	Cluster 1; R_up_day	Cluster 1; R_up_night	Unknown
VIT_00s0262g00170	E3 ubiquitin-protein ligase HUWE1	Cluster 1; R_up_day	Cluster 1; R_up_night	Metabolism.Primary metabolism.Protein metabolism and modification.Proteolysis.cytoplasmic and nuclear protein degradation.Ubiquitin-mediated proteolysis
VIT_00s0266g00030	Receptor kinase 2	Cluster 1; R_up_day	Cluster 1; R_up_night	Signaling.Signaling pathway.Protein kinase
VIT_00s0267g00020	Dynamin-2A	Cluster 1; R_up_day	Cluster 1; R_up_night	Transport overview.Incompletely characterized transport systems.Putative transport protein.YbbM	Cellular process.Cellular transport.Protein trafficking.Vesicle-mediated trafficking
VIT_00s0271g00050	Pentatricopeptide (PPR) repeat-containing protein	Cluster 1; R_up_day	Cluster 1; R_up_night	Diverse functions.Gene family with diverse functions.Pentatricopeptide domain family
VIT_00s0271g00110	flavodoxin-like quinone reductase 1	Cluster 1; R_up_day	Cluster 1; R_up_night	Signaling.Hormone Signaling.Auxin Signaling.Auxin-mediated Signaling pathway	Metabolism.Cellular metabolism.Oxidation reduction.Flavin-containing monooxygenase
VIT_00s0273g00030	No hit	Cluster 1; R_up_day	Cluster 1; R_up_night	No hit
VIT_00s0274g00030	Myrcene synthase Oc15	Cluster 1; R_up_day	Cluster 1; R_up_night	Metabolism.Secondary metabolism.Terpenoid metabolism.Monoterpenoid metabolism.Monoterpenoid biosynthesis
VIT_00s0274g00080	Benzoquinone reductase	Cluster 1; R_up_day	Cluster 1; R_up_night	Metabolism.Primary metabolism.Coenzyme and prosthetic group metabolism.Riboflavin metabolism
VIT_00s0274g00090	Quinone oxidoreductase	Cluster 1; R_up_day	Cluster 1; R_up_night	Metabolism.Primary metabolism.Generation of metabolite precursors and energy.Electron transport.Respiratory-chain phosphorylation	Transport overview.Primary Active Transporters.Oxidoreduction-driven transporters.Proton-translocating NADH Dehydrogenase
VIT_00s0283g00050	Geranyl diphosphate synthase	Cluster 1; R_up_day	Cluster 1; R_up_night	Metabolism.Primary metabolism.Lipid metabolism.Steroid metabolism.Steroid biosynthesis	Metabolism.Secondary metabolism.Terpenoid metabolism.Terpenoid biosynthesis
VIT_00s0283g00080	MtN19-like protein	Cluster 1; R_up_day	Cluster 1; R_up_night	Development.Root development
VIT_00s0285g00050	No hit	Cluster 1; R_up_day	Cluster 1; R_up_night	No hit
VIT_00s0291g00100	ABC transporter B member 5	Cluster 1; R_up_day	Cluster 1; R_up_night	Transport overview.Macromolecule transport.Multidrug transport.Multidrug ABC transport
VIT_00s0294g00020	Kinase	Cluster 1; R_up_day	Cluster 1; R_up_night	Signaling.Signaling pathway.Protein kinase
VIT_00s0301g00070	No hit	Cluster 1; R_up_day	Cluster 1; R_up_night	No hit
VIT_00s0301g00090	NDA2 (alternative NAD(P)H dehydrogenase 2)	Cluster 1; R_up_day	Cluster 1; R_up_night	Metabolism.Primary metabolism.Generation of metabolite precursors and energy.Electron transport.Respiratory-chain phosphorylation	Transport overview.Primary Active Transporters.Oxidoreduction-driven transporters.Proton-translocating NADH Dehydrogenase
VIT_00s0301g00130	Late embryogenesis abundant protein	Cluster 1; R_up_day	Cluster 1; R_up_night	Response to stimulus.Stress response.Abiotic stress response.Desiccation stress response
VIT_00s0304g00040	Succinate dehydrogenase iron-sulfur protein	Cluster 1; R_up_day	Cluster 1; R_up_night	Metabolism.Primary metabolism.Generation of metabolite precursors and energy.Citric acid cycle	Metabolism.Primary metabolism.Generation of metabolite precursors and energy.Electron transport.Respiratory-chain phosphorylation	Metabolism.Primary metabolism.Generation of metabolite precursors and energy.Glyoxylate and dicarboxylate metabolism
VIT_00s0313g00060	No hit	Cluster 1; R_up_day	Cluster 1; R_up_night	No hit
VIT_00s0316g00040	Disease resistance protein	Cluster 1; R_up_day	Cluster 1; R_up_night	Response to stimulus.Stress response.Biotic stress response	Response to stimulus.Stress response.Biotic stress response.Plant-pathogen interaction	Diverse functions.Gene family with diverse functions.NBS-LRR superfamily
VIT_00s0316g00060	HcrVf1 protein	Cluster 1; R_up_day	Cluster 1; R_up_night	Diverse functions.Gene family with diverse functions.NBS-LRR superfamily	Response to stimulus.Stress response.Biotic stress response
VIT_00s0317g00140	Exocyst subunit EXO70 H2	Cluster 1; R_up_day	Cluster 1; R_up_night	Transport overview.Macromolecule transport.Protein transport.Tethering factors	Cellular process.Cellular transport.Protein trafficking.Vesicle-mediated trafficking
VIT_00s0322g00030	Alpha-6-galactosyltransferase	Cluster 1; R_up_day	Cluster 1; R_up_night	Cellular process.Cellular component organization and biogenesis.Cell wall organization and biogenesis
VIT_00s0324g00050	UDP-glucose glucosyltransferase	Cluster 1; R_up_day	Cluster 1; R_up_night	Metabolism.Primary metabolism.Carbohydrate metabolism.Polysaccharide metabolism.Starch and sucrose metabolism	Metabolism.Secondary metabolism.Aromatic compound metabolism.Aromatic compound glysosylation
VIT_00s0324g00060	UDP-glycosyltransferase 85A8	Cluster 1; R_up_day	Cluster 1; R_up_night	Metabolism.Primary metabolism.Carbohydrate metabolism.Glycosyl transference
VIT_00s0327g00070	Acyl-[acyl-carrier-protein] desaturase	Cluster 1; R_up_day	Cluster 1; R_up_night	Metabolism.Primary metabolism.Lipid metabolism.Fatty acid metabolism.Fatty acid biosynthesis.Unsaturated fatty acid biosynthesis
VIT_00s0337g00020	S locus-linked protein SLL2	Cluster 1; R_up_day	Cluster 1; R_up_night	Metabolism.Cellular metabolism.Amino acid derivative metabolism.S-adenosylmethionine metabolism
VIT_00s0346g00100	Sinapyl alcohol dehydrogenase	Cluster 1; R_up_day	Cluster 1; R_up_night	Metabolism.Secondary metabolism.Phenylpropanoid metabolism.Phenylpropanoid biosynthesis
VIT_00s0346g00110	Mannitol dehydrogenase	Cluster 1; R_up_day	Cluster 1; R_up_night	Metabolism.Primary metabolism.Carbohydrate metabolism.Monosaccharide metabolism.Fructose and mannose metabolism
VIT_00s0347g00030	Zinc finger (B-box type)	Cluster 1; R_up_day	Cluster 1; R_up_night	Regulation overview.Regulation of gene expression.Regulation of transcription.Transcription factor.Zinc finger B-box family transcription factor
VIT_00s0347g00070	S-locus lectin protein kinase	Cluster 1; R_up_day	Cluster 1; R_up_night	Signaling.Signaling pathway.Protein kinase
VIT_00s0349g00050	Protein FD (BZIP transcription factor 14)	Cluster 1; R_up_day	Cluster 1; R_up_night	Development.Reproductive development.Flower development	Regulation overview.Regulation of gene expression.Regulation of transcription.Transcription factor.bZIP family transcription factor
VIT_00s0353g00020	S-locus lectin protein kinase	Cluster 1; R_up_day	Cluster 1; R_up_night	Signaling.Signaling pathway.Protein kinase
VIT_00s0369g00010	No hit	Cluster 1; R_up_day	Cluster 1; R_up_night	No hit
VIT_00s0369g00040	Polygalacturonase GH28	Cluster 1; R_up_day	Cluster 1; R_up_night	Cellular process.Cellular component organization and biogenesis.Cell wall organization and biogenesis.Cell wall metabolism.Cell wall modification.Pectin modification
VIT_00s0371g00010	Cinnamyl alcohol dehydrogenase	Cluster 1; R_up_day	Cluster 1; R_up_night	Metabolism.Secondary metabolism.Phenylpropanoid metabolism.Phenylpropanoid biosynthesis
VIT_00s0371g00040	Sinapyl alcohol dehydrogenase	Cluster 1; R_up_day	Cluster 1; R_up_night	Metabolism.Secondary metabolism.Phenylpropanoid metabolism.Phenylpropanoid biosynthesis
VIT_00s0371g00050	Mannitol dehydrogenase	Cluster 1; R_up_day	Cluster 1; R_up_night	Metabolism.Primary metabolism.Carbohydrate metabolism.Monosaccharide metabolism.Fructose and mannose metabolism
VIT_00s0374g00020	S-locus lectin protein kinase	Cluster 1; R_up_day	Cluster 1; R_up_night	Signaling.Signaling pathway.Protein kinase
VIT_00s0375g00060	Ent-kaurene synthase	Cluster 1; R_up_day	Cluster 1; R_up_night	Metabolism.Secondary metabolism.Terpenoid metabolism.Diterpenoid metabolism.Diterpenoid biosynthesis	Signaling.Hormone Signaling.Gibberellic acid Signaling.Gibberellic acid metabolism.Gibberellic acid biosynthesis
VIT_00s0378g00020	Disease resistance protein (NBS class)	Cluster 1; R_up_day	Cluster 1; R_up_night	Diverse functions.Gene family with diverse functions.NBS-LRR superfamily	Response to stimulus.Stress response.Biotic stress response
VIT_00s0379g00060	SAP domain-containing protein	Cluster 1; R_up_day	Cluster 1; R_up_night	Unclear
VIT_00s0388g00010	Serine/threonine kinase	Cluster 1; R_up_day	Cluster 1; R_up_night	Signaling.Signaling pathway.Protein kinase
VIT_00s0397g00030	Chloride channel protein B	Cluster 1; R_up_day	Cluster 1; R_up_night	Transport overview.Electrochemical Potential-driven Transporters.Porters.Chloride Carrier/Channel	Transport overview.Ion transport.Anion transport.Chloride transport
VIT_00s0398g00030	Receptor kinase RK20-1	Cluster 1; R_up_day	Cluster 1; R_up_night	Signaling.Signaling pathway.Protein kinase
VIT_00s0400g00040	Dynamin-2A	Cluster 1; R_up_day	Cluster 1; R_up_night	Cellular process.Cellular transport.Protein trafficking.Vesicle-mediated trafficking	Signaling.Signaling pathway.G-protein signaling pathway
VIT_00s0400g00050	No hit	Cluster 1; R_up_day	Cluster 1; R_up_night	No hit
VIT_00s0409g00010	Receptor kinase RK20-1	Cluster 1; R_up_day	Cluster 1; R_up_night	Signaling.Signaling pathway.Protein kinase
VIT_00s0413g00010	Laccase (diphenol oxidase) family protein	Cluster 1; R_up_day	Cluster 1; R_up_night	Metabolism.single reactions	Transport overview.Incompletely characterized transport systems.Recognized transporters of unknown biochemical mechanism.Iron/Lead Transporter.Oxidase-dep Fe2+ Transporter	Metabolism.Secondary metabolism.Phenylpropanoid metabolism.Lignin metabolism	Response to stimulus.Stress response.Abiotic stress response.Oxidative stress response
VIT_00s0414g00050	Cellulose synthase CSLE1	Cluster 1; R_up_day	Cluster 1; R_up_night	Cellular process.Cellular component organization and biogenesis.Cell wall organization and biogenesis.Cell wall metabolism.Cell wall biosynthesis.Cellulose biosynthesis
VIT_00s0421g00020	Hcr2-5B	Cluster 1; R_up_day	Cluster 1; R_up_night	Response to stimulus.Stress response.Biotic stress response
VIT_00s0426g00010	No hit	Cluster 1; R_up_day	Cluster 1; R_up_night	No hit
VIT_00s0426g00060	No hit	Cluster 1; R_up_day	Cluster 1; R_up_night	No hit
VIT_00s0432g00010	No hit	Cluster 1; R_up_day	Cluster 1; R_up_night	No hit
VIT_00s0456g00020	S-locus lectin protein kinase	Cluster 1; R_up_day	Cluster 1; R_up_night	Signaling.Signaling pathway.Protein kinase
VIT_00s0481g00010	Tobamovirus multiplication 1 homolog 3	Cluster 1; R_up_day	Cluster 1; R_up_night	Response to stimulus.Stress response.Biotic stress response.Virus stress response.Tobamovirus replication host gene
VIT_00s0481g00020	Diphenol oxidase	Cluster 1; R_up_day	Cluster 1; R_up_night	Metabolism.Primary metabolism.Amino acid metabolism.Aromatic amino acid metabolism.Tyrosine metabolism	Transport overview.Incompletely characterized transport systems.Recognized transporters of unknown biochemical mechanism.Iron/Lead Transporter.Oxidase-dep Fe2+ Transporter	Metabolism.Secondary metabolism.Aromatic compound metabolism.Rosmarinic acid biosynthesis	Response to stimulus.Stress response.Abiotic stress response.Oxidative stress response
VIT_00s0500g00010	No hit	Cluster 1; R_up_day	Cluster 1; R_up_night	No hit
VIT_00s0517g00010	Unknown	Cluster 1; R_up_day	Cluster 1; R_up_night	Unknown
VIT_00s0524g00010	Armadillo/beta-catenin repeat protein / U-box domain-containing protein	Cluster 1; R_up_day	Cluster 1; R_up_night	Unknown
VIT_00s0524g00030	Armadillo/beta-catenin repeat protein / U-box domain-containing protein	Cluster 1; R_up_day	Cluster 1; R_up_night	Unknown
VIT_00s0524g00040	No hit	Cluster 1; R_up_day	Cluster 1; R_up_night	No hit
VIT_00s0527g00030	Arabinogalactan protein AGP31	Cluster 1; R_up_day	Cluster 1; R_up_night	Cellular process.Cellular component organization and biogenesis.Cell wall organization and biogenesis.Cell wall structural protein
VIT_00s0574g00020	No hit	Cluster 1; R_up_day	Cluster 1; R_up_night	No hit
VIT_00s0575g00020	Strictosidine synthase	Cluster 1; R_up_day	Cluster 1; R_up_night	Metabolism.Secondary metabolism.Terpenoid metabolism.Terpenoid biosynthesis	Metabolism.Secondary metabolism.Terpenoid metabolism.Monoterpenoid metabolism.Monoterpenoid biosynthesis	Metabolism.Secondary metabolism.Primary amino acids derivated metabolism.Alkaloid metabolism.Alkaloid biosynthesis.Monoterpenoid indole alkaloid metabolism.Monoterpenoid indole alkaloid biosynthesis
VIT_00s0595g00020	Receptor kinase 2	Cluster 1; R_up_day	Cluster 1; R_up_night	Signaling.Signaling pathway.Protein kinase
VIT_00s0615g00010	Cinnamyl alcohol dehydrogenase	Cluster 1; R_up_day	Cluster 1; R_up_night	Metabolism.Secondary metabolism.Phenylpropanoid metabolism.Phenylpropanoid biosynthesis
VIT_00s0662g00030	Ethylene-responsive transcription factor related to APETALA2 4	Cluster 1; R_up_day	Cluster 1; R_up_night	Signaling.Hormone Signaling.Ethylene Signaling.Ethylene-mediated Signaling pathway	Regulation overview.Regulation of gene expression.Regulation of transcription.Transcription factor.AP2 family transcription factor
VIT_00s0662g00040	Ethylene-responsive transcription factor related to APETALA2 4	Cluster 1; R_up_day	Cluster 1; R_up_night	Signaling.Hormone Signaling.Ethylene Signaling.Ethylene-mediated Signaling pathway	Regulation overview.Regulation of gene expression.Regulation of transcription.Transcription factor.AP2 family transcription factor
VIT_00s0671g00010	Ribosomal protein P0 acidic	Cluster 1; R_up_day	Cluster 1; R_up_night	Metabolism.Primary metabolism.Protein metabolism and modification.Protein synthesis.Ribosome
VIT_00s0679g00010	ABC transporter G member 7	Cluster 1; R_up_day	Cluster 1; R_up_night	Transport overview.Macromolecule transport.Multidrug transport.Multidrug ABC transport
VIT_00s0705g00010	CYP81E1 Isoflavone 2'-hydroxylase	Cluster 1; R_up_day	Cluster 1; R_up_night	Metabolism.Secondary metabolism.Phenylpropanoid metabolism.Flavonoid metabolism.Isoflavonoid metabolism.Isoflavonoid biosynthesis	Metabolism.Cellular metabolism.Oxidation reduction.Cytochrome P450 oxidoreductase
VIT_00s0731g00010	Laccase	Cluster 1; R_up_day	Cluster 1; R_up_night	Metabolism.single reactions	Transport overview.Incompletely characterized transport systems.Recognized transporters of unknown biochemical mechanism.Iron/Lead Transporter.Oxidase-dep Fe2+ Transporter	Metabolism.Secondary metabolism.Phenylpropanoid metabolism.Lignin metabolism	Response to stimulus.Stress response.Abiotic stress response.Oxidative stress response
VIT_00s0768g00030	Isopentenyl diphosphate isomerase 2	Cluster 1; R_up_day	Cluster 1; R_up_night	Metabolism.Primary metabolism.Lipid metabolism.Steroid metabolism.Steroid biosynthesis	Metabolism.Secondary metabolism.Terpenoid metabolism.Terpenoid biosynthesis
VIT_00s0768g00040	Receptor protein kinase PERK1	Cluster 1; R_up_day	Cluster 1; R_up_night	Signaling.Signaling pathway.Protein kinase
VIT_00s0790g00020	CYP81D2	Cluster 1; R_up_day	Cluster 1; R_up_night	Metabolism.Cellular metabolism.Oxidation reduction.Cytochrome P450 oxidoreductase
VIT_00s0827g00050	PHD zinc finger protein	Cluster 1; R_up_day	Cluster 1; R_up_night	Unknown
VIT_00s0916g00010	Zinc finger (C3HC4-type ring finger) protein (RMA1)	Cluster 1; R_up_day	Cluster 1; R_up_night	Regulation overview.Regulation of gene expression.Regulation of transcription.Transcription factor.Zinc finger C3HC4 family transcription factor
VIT_00s0929g00020	Receptor protein kinase PERK1	Cluster 1; R_up_day	Cluster 1; R_up_night	Signaling.Signaling pathway.Protein kinase
VIT_00s0984g00010	Phosphoglycerate mutase	Cluster 1; R_up_day	Cluster 1; R_up_night	Metabolism.Primary metabolism.Carbohydrate metabolism.Glycolysis Gluconeogenesis
VIT_00s1057g00010	No hit	Cluster 1; R_up_day	Cluster 1; R_up_night	No hit
VIT_00s1212g00010	Diphenol oxidase	Cluster 1; R_up_day	Cluster 1; R_up_night	Metabolism.Primary metabolism.Amino acid metabolism.Aromatic amino acid metabolism.Tyrosine metabolism	Transport overview.Incompletely characterized transport systems.Recognized transporters of unknown biochemical mechanism.Iron/Lead Transporter.Oxidase-dep Fe2+ Transporter	Metabolism.Secondary metabolism.Aromatic compound metabolism.Rosmarinic acid biosynthesis	Response to stimulus.Stress response.Abiotic stress response.Oxidative stress response
VIT_00s1212g00020	Laccase	Cluster 1; R_up_day	Cluster 1; R_up_night	Metabolism.single reactions	Transport overview.Incompletely characterized transport systems.Recognized transporters of unknown biochemical mechanism.Iron/Lead Transporter.Oxidase-dep Fe2+ Transporter	Metabolism.Secondary metabolism.Phenylpropanoid metabolism.Lignin metabolism	Response to stimulus.Stress response.Abiotic stress response.Oxidative stress response
VIT_00s1232g00020	Ribosomal protein L12	Cluster 1; R_up_day	Cluster 1; R_up_night	Metabolism.Primary metabolism.Protein metabolism and modification.Protein synthesis.Ribosome
VIT_00s1278g00010	Brassinosteroid insensitive 1-associated receptor kinase 1	Cluster 1; R_up_day	Cluster 1; R_up_night	Signaling.Hormone Signaling.Brassinosteroid Signaling.Brassinosteroid-mediated Signaling pathway
VIT_00s1291g00030	Receptor protein kinase PERK1	Cluster 1; R_up_day	Cluster 1; R_up_night	Signaling.Signaling pathway.Protein kinase
VIT_00s1389g00010	Cinnamyl alcohol dehydrogenase	Cluster 1; R_up_day	Cluster 1; R_up_night	Metabolism.Secondary metabolism.Phenylpropanoid metabolism.Phenylpropanoid biosynthesis
VIT_00s1397g00020	No hit	Cluster 1; R_up_day	Cluster 1; R_up_night	No hit
VIT_00s1488g00020	Glycogen (starch) synthase	Cluster 1; R_up_day	Cluster 1; R_up_night	Metabolism.Primary metabolism.Carbohydrate metabolism.Polysaccharide metabolism.Starch and sucrose metabolism
VIT_00s1490g00010	5'-adenylylsulfate reductase (APR1)	Cluster 1; R_up_day	Cluster 1; R_up_night	Metabolism.Cellular metabolism.Nitrogen and sulfur metabolism.Sulfur metabolism.Sulfate assimilation
VIT_00s1627g00020	No hit	Cluster 1; R_up_day	Cluster 1; R_up_night	No hit
VIT_00s1751g00010	Trypsin and protease inhibitor family	Cluster 1; R_up_day	Cluster 1; R_up_night	Metabolism.Primary metabolism.Protein metabolism and modification.Proteolysis
VIT_00s2191g00010	Cytokinin oxidase	Cluster 1; R_up_day	Cluster 1; R_up_night	Signaling.Hormone Signaling.Cytokinin Signaling.Cytokinin metabolism.Cytokinin catabolism
VIT_00s2215g00010		Cluster 1; R_up_day	Cluster 1; R_up_night	Metabolism.Primary metabolism.Amino acid metabolism.Aromatic amino acid metabolism.Tyrosine metabolism	Metabolism.Secondary metabolism.Aromatic compound metabolism.Betalain biosynthesis
VIT_00s2280g00010	Laccase	Cluster 1; R_up_day	Cluster 1; R_up_night	Metabolism.single reactions	Transport overview.Incompletely characterized transport systems.Recognized transporters of unknown biochemical mechanism.Iron/Lead Transporter.Oxidase-dep Fe2+ Transporter	Metabolism.Secondary metabolism.Phenylpropanoid metabolism.Lignin metabolism	Response to stimulus.Stress response.Abiotic stress response.Oxidative stress response
VIT_00s2287g00010	Unknown protein	Cluster 1; R_up_day	Cluster 1; R_up_night	Unknown
VIT_00s2342g00010	PUB9 (plant U- box 9)	Cluster 1; R_up_day	Cluster 1; R_up_night	Cellular process.Cell growth and death.Cell death	Metabolism.Primary metabolism.Protein metabolism and modification.Proteolysis.cytoplasmic and nuclear protein degradation.Ubiquitin-mediated proteolysis
VIT_00s2342g00020	No hit	Cluster 1; R_up_day	Cluster 1; R_up_night	No hit
VIT_00s2376g00010	NADH dehydrogenase	Cluster 1; R_up_day	Cluster 1; R_up_night	Metabolism.Primary metabolism.Generation of metabolite precursors and energy.Electron transport.Respiratory-chain phosphorylation	Transport overview.Primary Active Transporters.Oxidoreduction-driven transporters.Proton-translocating NADH Dehydrogenase
VIT_00s2520g00010	Cytokinin oxidase	Cluster 1; R_up_day	Cluster 1; R_up_night	Signaling.Hormone Signaling.Cytokinin Signaling.Cytokinin metabolism.Cytokinin catabolism
VIT_00s2542g00010	Receptor kinase CHRK1	Cluster 1; R_up_day	Cluster 1; R_up_night	Signaling.Signaling pathway.Protein kinase
VIT_00s2643g00020	SET domain-containing protein 2	Cluster 1; R_up_day	Cluster 1; R_up_night	Regulation overview.Regulation of gene expression.Regulation of transcription.Transcription factor.SET PCG family transcription factor
VIT_00s2648g00010	FAD-dependent pyridine nucleotide-disulphide oxidoreductase	Cluster 1; R_up_day	Cluster 1; R_up_night	Unclear
VIT_00s2847g00010	S-locus lectin protein kinase	Cluster 1; R_up_day	Cluster 1; R_up_night	Signaling.Signaling pathway.Protein kinase
VIT_01s0010g00090	BRCA1 interacting protein C-terminal helicase 1	Cluster 1; R_up_day	Cluster 1; R_up_night	Metabolism.Primary metabolism.Nucleobase, nucleoside, nucleotide, nucleic acid metabolism.Nucleic acid metabolism.DNA metabolism
VIT_01s0010g00130	Apyrase	Cluster 1; R_up_day	Cluster 1; R_up_night	Metabolism.Primary metabolism.Nucleobase, nucleoside, nucleotide, nucleic acid metabolism.Nucleotide metabolism.Purine metabolism	Metabolism.Primary metabolism.Nucleobase, nucleoside, nucleotide, nucleic acid metabolism.Nucleotide metabolism.Pyrimidine metabolism
VIT_01s0010g00140	No hit	Cluster 1; R_up_day	Cluster 1; R_up_night	No hit
VIT_01s0010g00240	CTP-synthetase	Cluster 1; R_up_day	Cluster 1; R_up_night	Metabolism.Primary metabolism.Nucleobase, nucleoside, nucleotide, nucleic acid metabolism.Nucleotide metabolism.Pyrimidine metabolism
VIT_01s0010g00530	UDP-glucoronosyl and UDP-glucosyl transferase	Cluster 1; R_up_day	Cluster 1; R_up_night	Unclear
VIT_01s0010g00620	Phosphatidylserine decarboxylase	Cluster 1; R_up_day	Cluster 1; R_up_night	Metabolism.Primary metabolism.Amino acid metabolism.Glycine, serine, and threonine metabolism	Metabolism.Primary metabolism.Lipid metabolism.Glycerolipid metabolism.Glycerophospholipid metabolism
VIT_01s0010g00800	Unknown	Cluster 1; R_up_day	Cluster 1; R_up_night	Unknown
VIT_01s0010g01250	S ribonuclease	Cluster 1; R_up_day	Cluster 1; R_up_night	Metabolism.Primary metabolism.Nucleobase, nucleoside, nucleotide, nucleic acid metabolism.Nucleic acid metabolism.RNA metabolism.RNA processing
VIT_01s0010g01360	No hit	Cluster 1; R_up_day	Cluster 1; R_up_night	No hit
VIT_01s0010g01920	Anionic peroxidase	Cluster 1; R_up_day	Cluster 1; R_up_night	Metabolism.Primary metabolism.Amino acid metabolism.Aromatic amino acid metabolism.Phenylalanine metabolism.Phenylalanine biosynthesis	Metabolism.Cellular metabolism.Methane metabolism
VIT_01s0010g01960	Anionic peroxidase	Cluster 1; R_up_day	Cluster 1; R_up_night	Metabolism.Primary metabolism.Amino acid metabolism.Aromatic amino acid metabolism.Phenylalanine metabolism.Phenylalanine biosynthesis	Metabolism.Cellular metabolism.Methane metabolism
VIT_01s0010g02000	Peroxidase	Cluster 1; R_up_day	Cluster 1; R_up_night	Metabolism.Primary metabolism.Amino acid metabolism.Aromatic amino acid metabolism.Phenylalanine metabolism.Phenylalanine biosynthesis	Metabolism.Cellular metabolism.Methane metabolism	Response to stimulus.Stress response.Abiotic stress response.Oxidative stress response
VIT_01s0010g02020	Peroxidase (EC 1.11.1.7)	Cluster 1; R_up_day	Cluster 1; R_up_night	Metabolism.Primary metabolism.Amino acid metabolism.Aromatic amino acid metabolism.Phenylalanine metabolism.Phenylalanine biosynthesis	Metabolism.Cellular metabolism.Methane metabolism	Response to stimulus.Stress response.Abiotic stress response.Oxidative stress response
VIT_01s0010g02040	Hydroxyproline-rich glycoprotein	Cluster 1; R_up_day	Cluster 1; R_up_night	Cellular process.Cellular component organization and biogenesis.Cell wall organization and biogenesis.Cell wall structural protein	Regulation overview.Regulation of gene expression.Regulation of transcription.Transcription factor.Trihelix family transcription factor
VIT_01s0010g02110	Zinc finger (C3HC4-type ring finger)	Cluster 1; R_up_day	Cluster 1; R_up_night	Regulation overview.Regulation of gene expression.Regulation of transcription.Transcription factor.Zinc finger C3HC4 family transcription factor
VIT_01s0010g02120	Zinc finger (C3HC4-type ring finger)	Cluster 1; R_up_day	Cluster 1; R_up_night	Regulation overview.Regulation of gene expression.Regulation of transcription.Transcription factor.Zinc finger C3HC4 family transcription factor
VIT_01s0010g02450	B12D	Cluster 1; R_up_day	Cluster 1; R_up_night	Unclear
VIT_01s0010g03090	Malate dehydrogenase	Cluster 1; R_up_day	Cluster 1; R_up_night	Metabolism.Primary metabolism.Generation of metabolite precursors and energy.Citric acid cycle	Metabolism.Primary metabolism.Carbohydrate metabolism.Monosaccharide metabolism.Pyruvate metabolism	Metabolism.Primary metabolism.Generation of metabolite precursors and energy.Glyoxylate and dicarboxylate metabolism	Metabolism.Primary metabolism.Carbon fixation	Metabolism.Primary metabolism.Generation of metabolite precursors and energy.Reductive carboxylate cycle
VIT_01s0010g03210	HcrVf1 protein	Cluster 1; R_up_day	Cluster 1; R_up_night	Diverse functions.Gene family with diverse functions.NBS-LRR superfamily	Response to stimulus.Stress response.Biotic stress response
VIT_01s0010g03240	Translation initiation factor 3 subunit K	Cluster 1; R_up_day	Cluster 1; R_up_night	Metabolism.Primary metabolism.Protein metabolism and modification.Protein synthesis.Translation.Translational initiation	Transport overview.Macromolecule transport.RNA transport
VIT_01s0010g03270	Unc51-like kinase	Cluster 1; R_up_day	Cluster 1; R_up_night	Metabolism.Cellular metabolism.Cellular catabolism.Autophagy	Signaling.Signaling pathway.TOR Signaling pathway	Signaling.Signaling pathway.Protein kinase
VIT_01s0010g03430	HcrVf1 protein	Cluster 1; R_up_day	Cluster 1; R_up_night	Diverse functions.Gene family with diverse functions.NBS-LRR superfamily	Response to stimulus.Stress response.Biotic stress response
VIT_01s0010g03470	Caffeoyl-CoA O-methyltransferase	Cluster 1; R_up_day	Cluster 1; R_up_night	Metabolism.Secondary metabolism.Phenylpropanoid metabolism.Phenylpropanoid biosynthesis
VIT_01s0010g03490	Caffeoyl-CoA O-methyltransferase	Cluster 1; R_up_day	Cluster 1; R_up_night	Metabolism.Secondary metabolism.Phenylpropanoid metabolism.Phenylpropanoid biosynthesis
VIT_01s0010g03510	Caffeoyl-CoA O-methyltransferase	Cluster 1; R_up_day	Cluster 1; R_up_night	Metabolism.Secondary metabolism.Phenylpropanoid metabolism.Phenylpropanoid biosynthesis
VIT_01s0010g03520	No hit	Cluster 1; R_up_day	Cluster 1; R_up_night	No hit
VIT_01s0010g03680	Unknown protein	Cluster 1; R_up_day	Cluster 1; R_up_night	Unknown
VIT_01s0010g03800	Unknown protein	Cluster 1; R_up_day	Cluster 1; R_up_night	Unknown
VIT_01s0011g00040	No hit	Cluster 1; R_up_day	Cluster 1; R_up_night	No hit
VIT_01s0011g00510	Unknown protein	Cluster 1; R_up_day	Cluster 1; R_up_night	Unknown
VIT_01s0011g00530	Ureide permease 2 (AtUPS2)	Cluster 1; R_up_day	Cluster 1; R_up_night	Transport overview.Electrochemical Potential-driven Transporters.Porters.Drug/Metabolite Transporter.Nucleobase Uptake Transporter	Transport overview.Macromolecule transport.Nucleotide transport
VIT_01s0011g00720	WRKY DNA-binding protein 57	Cluster 1; R_up_day	Cluster 1; R_up_night	Regulation overview.Regulation of gene expression.Regulation of transcription.Transcription factor.WRKY family transcription factor
VIT_01s0011g00750	Glycosyl hydrolase family 1	Cluster 1; R_up_day	Cluster 1; R_up_night	Metabolism.Primary metabolism.Carbohydrate metabolism.Carbohydrate catabolism
VIT_01s0011g00790	DnaJ homolog	Cluster 1; R_up_day	Cluster 1; R_up_night	Transport overview.Primary Active Transporters.P-P-bond hydrolysis-driven transporters.General Secretory Pathway (Sec)	Regulation overview.Regulation of gene expression.Regulation of transcription.Transcription factor.MYB-related family transcription factor	Metabolism.Primary metabolism.Protein metabolism and modification.Protein folding.Chaperone-mediated protein folding.HSP-mediated protein folding.HSP-mediated protein folding co-chaperone
VIT_01s0011g00800	Beta-D-glucosidase	Cluster 1; R_up_day	Cluster 1; R_up_night	Metabolism.Cellular metabolism.Amino acid derivative metabolism.Cyanoamino acid metabolism	Metabolism.Primary metabolism.Carbohydrate metabolism.Polysaccharide metabolism.Starch and sucrose metabolism	Metabolism.Secondary metabolism.Terpenoid metabolism.Monoterpenoid metabolism.Monoterpenoid biosynthesis	Cellular process.Cellular component organization and biogenesis.Cell wall organization and biogenesis.Cell wall metabolism.Cell wall modification.Beta-glucoside modification
VIT_01s0011g00820	Remorin	Cluster 1; R_up_day	Cluster 1; R_up_night	Unclear
VIT_01s0011g00960	RPM1 (resistance to p. syringae pv maculicola 1)	Cluster 1; R_up_day	Cluster 1; R_up_night	Response to stimulus.Stress response.Biotic stress response.Plant-pathogen interaction
VIT_01s0011g00990	RPM1 (resistance to p. syringae pv maculicola 1)	Cluster 1; R_up_day	Cluster 1; R_up_night	Response to stimulus.Stress response.Biotic stress response.Plant-pathogen interaction
VIT_01s0011g01000	RPM1 (resistance to p. syringae pv maculicola 1)	Cluster 1; R_up_day	Cluster 1; R_up_night	Response to stimulus.Stress response.Biotic stress response.Plant-pathogen interaction
VIT_01s0011g01170	No hit	Cluster 1; R_up_day	Cluster 1; R_up_night	No hit
VIT_01s0011g01210	No hit	Cluster 1; R_up_day	Cluster 1; R_up_night	No hit
VIT_01s0011g01650	Peptidylprolyl isomerase	Cluster 1; R_up_day	Cluster 1; R_up_night	Metabolism.Primary metabolism.Protein metabolism and modification.Protein folding.Peptidyl prolyl isomerase-mediated protein folding
VIT_01s0011g01810	No hit	Cluster 1; R_up_day	Cluster 1; R_up_night	No hit
VIT_01s0011g01900	Glutathione S-transferase	Cluster 1; R_up_day	Cluster 1; R_up_night	Metabolism.Primary metabolism.Coenzyme and prosthetic group metabolism.Peptide derived compounds biosynthesis.Glutathione metabolism	Response to stimulus.Stress response.Abiotic stress response.Oxidative stress response
VIT_01s0011g02020	2-oxo acid dehydrogenase	Cluster 1; R_up_day	Cluster 1; R_up_night	Metabolism.Primary metabolism.Carbohydrate metabolism.Glycolysis Gluconeogenesis.Glycolysis	Metabolism.Primary metabolism.Amino acid metabolism.Alanine and aspartate metabolism	Metabolism.Primary metabolism.Amino acid metabolism.Valine, leucine, and isoleucine metabolism.Valine, leucine, and isoleucine biosynthesis	Metabolism.Primary metabolism.Carbohydrate metabolism.Monosaccharide metabolism.Pyruvate metabolism	Metabolism.Primary metabolism.Organic acid metabolism.Butanoate metabolism
VIT_01s0011g02080	Ribosomal protein L36a/L44 (RPL36aB) 60S	Cluster 1; R_up_day	Cluster 1; R_up_night	Metabolism.Primary metabolism.Protein metabolism and modification.Protein synthesis.Ribosome
VIT_01s0011g02290	Zf A20 and AN1 domain-containing stress-associated protein 7	Cluster 1; R_up_day	Cluster 1; R_up_night	Regulation overview.Regulation of gene expression.Regulation of transcription.Transcription factor.Zinc finger AN1 family transcription factor
VIT_01s0011g02310	Unknown protein	Cluster 1; R_up_day	Cluster 1; R_up_night	Unknown
VIT_01s0011g02320	Unknown protein	Cluster 1; R_up_day	Cluster 1; R_up_night	Unknown
VIT_01s0011g02390	Unknown	Cluster 1; R_up_day	Cluster 1; R_up_night	Unknown
VIT_01s0011g02950	Zinc finger (C3HC4-type ring finger)	Cluster 1; R_up_day	Cluster 1; R_up_night	Regulation overview.Regulation of gene expression.Regulation of transcription.Transcription factor.Zinc finger C3HC4 family transcription factor
VIT_01s0011g03230	Basic/Leu zipper protein HBP-1b	Cluster 1; R_up_day	Cluster 1; R_up_night	Signaling.Hormone Signaling.Jasmonate salicylate signaling.Jasmonate Signaling.Jasmonate-mediated Signaling pathway	Regulation overview.Regulation of gene expression.Regulation of transcription.Transcription factor.bZIP family transcription factor	Regulation overview.Regulation of gene expression.Regulation of transcription.Transcription factor.TGA family (bZIP) transcription factor	Response to stimulus.Stress response
VIT_01s0011g03650	Map kinase substrate 1 MKS1	Cluster 1; R_up_day	Cluster 1; R_up_night	Signaling.Signaling pathway.Protein kinase.MAPK cascade
VIT_01s0011g03670	Bifunctional nuclease	Cluster 1; R_up_day	Cluster 1; R_up_night	Metabolism.Primary metabolism.Nucleobase, nucleoside, nucleotide, nucleic acid metabolism.Nucleic acid metabolism.DNA metabolism.DNA catabolism
VIT_01s0011g03740	Glutaminyl-tRNA synthetase	Cluster 1; R_up_day	Cluster 1; R_up_night	Metabolism.Primary metabolism.Amino acid metabolism.Glutamate metabolism	Metabolism.Primary metabolism.Nucleobase, nucleoside, nucleotide, nucleic acid metabolism.Nucleic acid metabolism.RNA metabolism.tRNA metabolism.tRNA processing	Metabolism.Primary metabolism.Protein metabolism and modification.Protein synthesis.Translation.Amino acid activation
VIT_01s0011g03850	Unknown protein	Cluster 1; R_up_day	Cluster 1; R_up_night	Unknown
VIT_01s0011g04040	No hit	Cluster 1; R_up_day	Cluster 1; R_up_night	No hit
VIT_01s0011g04210	Amino acid permease	Cluster 1; R_up_day	Cluster 1; R_up_night	Transport overview.Electrochemical Potential-driven Transporters.Porters.Amino Acid/Auxin Permease	Transport overview.Macromolecule transport.Amino acid transport
VIT_01s0011g04240	Zinc finger (B-box type)	Cluster 1; R_up_day	Cluster 1; R_up_night	Regulation overview.Regulation of gene expression.Regulation of transcription.Transcription factor.Zinc finger B-box family transcription factor
VIT_01s0011g04250	Zinc finger (B-box type)	Cluster 1; R_up_day	Cluster 1; R_up_night	Regulation overview.Regulation of gene expression.Regulation of transcription.Transcription factor.Zinc finger B-box family transcription factor
VIT_01s0011g04380	Acyl-(acyl carrier protein) thioesterase	Cluster 1; R_up_day	Cluster 1; R_up_night	Metabolism.Primary metabolism.Lipid metabolism.Fatty acid metabolism.Fatty acid biosynthesis
VIT_01s0011g04420	Unknown protein	Cluster 1; R_up_day	Cluster 1; R_up_night	Unknown
VIT_01s0011g04440	Transparent testa 12 protein	Cluster 1; R_up_day	Cluster 1; R_up_night	Transport overview.Electrochemical Potential-driven Transporters.Porters.Multidrug/Oligosaccharidyl-lipid/Polysaccharide Flippase.Multi Antimicrobial Extrusion	Transport overview.Macromolecule transport.Multidrug transport.Anthocyanin transport
VIT_01s0011g04570	No hit	Cluster 1; R_up_day	Cluster 1; R_up_night	No hit
VIT_01s0011g04680	Glycosyltransferase family 14	Cluster 1; R_up_day	Cluster 1; R_up_night	Metabolism.Primary metabolism.Carbohydrate metabolism.Polysaccharide metabolism
VIT_01s0011g04820	Molecular chaperone DnaJ	Cluster 1; R_up_day	Cluster 1; R_up_night	Transport overview.Primary Active Transporters.P-P-bond hydrolysis-driven transporters.General Secretory Pathway (Sec)	Metabolism.Primary metabolism.Protein metabolism and modification.Protein folding.Chaperone-mediated protein folding.HSP-mediated protein folding.HSP-mediated protein folding co-chaperone
VIT_01s0011g04870	Homeobox-leucine zipper protein 17 (HB-17)	Cluster 1; R_up_day	Cluster 1; R_up_night	Regulation overview.Regulation of gene expression.Regulation of transcription.Transcription factor.Homeobox domain family transcription factor
VIT_01s0011g05070	Major latex-like protein 34	Cluster 1; R_up_day	Cluster 1; R_up_night	Response to stimulus.Stress response.Biotic stress response
VIT_01s0011g05440	Unknown protein	Cluster 1; R_up_day	Cluster 1; R_up_night	Unknown
VIT_01s0011g05620	No hit	Cluster 1; R_up_day	Cluster 1; R_up_night	No hit
VIT_01s0011g05850	SEC14 cytosolic factor	Cluster 1; R_up_day	Cluster 1; R_up_night	Transport overview.Electrochemical Potential-driven Transporters.Porters.Drug/Metabolite Transporter.Triose-phosphate Transporter	Signaling.Signaling pathway.Phosphatidylinositol Signaling	Transport overview.Macromolecule transport.Lipid transport.Phosphatidylinositol/Phosphatidyl choline transport
VIT_01s0011g05890	S-adenosyl-L-methionine:salicylic acid carboxyl methyltransferase	Cluster 1; R_up_day	Cluster 1; R_up_night	Metabolism.Primary metabolism.Amino acid metabolism.Aromatic amino acid metabolism.Phenylalanine metabolism.Phenylalanine biosynthesis	Metabolism.Secondary metabolism.Aromatic compound metabolism
VIT_01s0011g05910	S-adenosyl-L-methionine:salicylic acid carboxyl methyltransferase	Cluster 1; R_up_day	Cluster 1; R_up_night	Metabolism.Primary metabolism.Amino acid metabolism.Aromatic amino acid metabolism.Phenylalanine metabolism.Phenylalanine biosynthesis	Metabolism.Secondary metabolism.Aromatic compound metabolism
VIT_01s0011g05980	No hit	Cluster 1; R_up_day	Cluster 1; R_up_night	No hit
VIT_01s0011g06260	Anthranilate synthase beta subunit	Cluster 1; R_up_day	Cluster 1; R_up_night	Metabolism.Primary metabolism.Amino acid metabolism.Aromatic amino acid metabolism.Aromatic amino acid biosynthesis	Metabolism.Primary metabolism.Amino acid metabolism.Amino acid biosynthesis	Metabolism.Primary metabolism.Amino acid metabolism.Aromatic amino acid metabolism.Tryptophan metabolism.Tryptophan biosynthesis
VIT_01s0026g00210	Aldehyde dehydrogenase (NAD+)	Cluster 1; R_up_day	Cluster 1; R_up_night	Metabolism.Primary metabolism.Carbohydrate metabolism.Glycolysis Gluconeogenesis	Metabolism.Primary metabolism.Lipid metabolism.Fatty acid metabolism	Metabolism.Primary metabolism.Amino acid metabolism.Arginine and proline metabolism.Urea cycle	Metabolism.Primary metabolism.Amino acid metabolism.Valine, leucine, and isoleucine metabolism.Valine, leucine, and isoleucine catabolism	Metabolism.Primary metabolism.Amino acid metabolism.Histidine metabolism	Metabolism.Primary metabolism.Amino acid metabolism.Beta-Alanine metabolism	Metabolism.Primary metabolism.Lipid metabolism.Glycerolipid metabolism	Metabolism.Primary metabolism.Carbohydrate metabolism.Monosaccharide metabolism.Pyruvate metabolism
VIT_01s0026g00740	Nucleobase-ascorbate transporter 6 (NAT6)	Cluster 1; R_up_day	Cluster 1; R_up_night	Transport overview.Electrochemical Potential-driven Transporters.Porters.Nucleobase:Cation Symporter-2	Transport overview.Macromolecule transport.Nucleobase or ascorbate transport
VIT_01s0026g00820	IAA-amino acid hydrolase 1 (ILR1)	Cluster 1; R_up_day	Cluster 1; R_up_night	Signaling.Hormone Signaling.Auxin Signaling.Auxin metabolism.Auxin activation by conjugation hydrolysis
VIT_01s0026g01020	Binding	Cluster 1; R_up_day	Cluster 1; R_up_night	Unknown
VIT_01s0026g01110	TIR-NBS-LRR disease resistance	Cluster 1; R_up_day	Cluster 1; R_up_night	Diverse functions.Gene family with diverse functions.NBS-LRR superfamily	Response to stimulus.Stress response.Biotic stress response
VIT_01s0026g01620	Protein kinase APK1A	Cluster 1; R_up_day	Cluster 1; R_up_night	Signaling.Signaling pathway.Protein kinase
VIT_01s0026g01660	Alpha-amylase isozyme C2 precursor	Cluster 1; R_up_day	Cluster 1; R_up_night	Metabolism.Primary metabolism.Carbohydrate metabolism.Polysaccharide metabolism.Starch and sucrose metabolism.Starch biosynthesis catabolism.Starch catabolism
VIT_01s0026g01730	WRKY DNA-binding protein 72	Cluster 1; R_up_day	Cluster 1; R_up_night	Regulation overview.Regulation of gene expression.Regulation of transcription.Transcription factor.WRKY family transcription factor
VIT_01s0026g01810	Squamosa promoter-binding protein 12 (SPL12)	Cluster 1; R_up_day	Cluster 1; R_up_night	Regulation overview.Regulation of gene expression.Regulation of transcription.Transcription factor.SBP family transcription factor
VIT_01s0026g02090	No hit	Cluster 1; R_up_day	Cluster 1; R_up_night	No hit
VIT_01s0026g02300	No hit	Cluster 1; R_up_day	Cluster 1; R_up_night	No hit
VIT_01s0026g02370	Glutathione S-transferase 10 GSTU10	Cluster 1; R_up_day	Cluster 1; R_up_night	Metabolism.Primary metabolism.Coenzyme and prosthetic group metabolism.Peptide derived compounds biosynthesis.Glutathione metabolism	Response to stimulus.Stress response.Abiotic stress response.Oxidative stress response
VIT_01s0026g02400	Glutathione S-transferase 10 GSTU10	Cluster 1; R_up_day	Cluster 1; R_up_night	Metabolism.Primary metabolism.Coenzyme and prosthetic group metabolism.Peptide derived compounds biosynthesis.Glutathione metabolism	Response to stimulus.Stress response.Abiotic stress response.Oxidative stress response
VIT_01s0113g00030	Unknown	Cluster 1; R_up_day	Cluster 1; R_up_night	Unknown
VIT_01s0113g00400	No hit	Cluster 1; R_up_day	Cluster 1; R_up_night	No hit
VIT_01s0113g00440	Midasin-related	Cluster 1; R_up_day	Cluster 1; R_up_night	Cellular process.Cellular component organization and biogenesis.Ribosome organization and biogenesis
VIT_01s0113g00540	Vesicle transport v-SNARE 13	Cluster 1; R_up_day	Cluster 1; R_up_night	Cellular process.Cellular transport.Protein trafficking.Vesicle-mediated trafficking.SNARE interactions in vesicular transport
VIT_01s0113g00560	Unknown protein	Cluster 1; R_up_day	Cluster 1; R_up_night	Unknown
VIT_01s0127g00070	Nitrate transporter2.5	Cluster 1; R_up_day	Cluster 1; R_up_night	Transport overview.Electrochemical Potential-driven Transporters.Porters.Major Facilitator Superfamily.Nitrate/Nitrite Porter	Transport overview.Ion transport.Anion transport.Nitrate transport
VIT_01s0127g00160	Cysteine-rich receptor-like protein kinase 2	Cluster 1; R_up_day	Cluster 1; R_up_night	Signaling.Signaling pathway.Protein kinase
VIT_01s0127g00320	CRS2-associated factor 2	Cluster 1; R_up_day	Cluster 1; R_up_night	Metabolism.Primary metabolism.Nucleobase, nucleoside, nucleotide, nucleic acid metabolism.Nucleic acid metabolism.RNA metabolism.RNA processing.mRNA processing.mRNA splicing
VIT_01s0127g00670	Proline extensin-like receptor kinase 1 (PERK1)	Cluster 1; R_up_day	Cluster 1; R_up_night	Signaling.Signaling pathway.Protein kinase
VIT_01s0127g00900	No hit	Cluster 1; R_up_day	Cluster 1; R_up_night	No hit
VIT_01s0137g00430	Cellulase	Cluster 1; R_up_day	Cluster 1; R_up_night	Cellular process.Cellular component organization and biogenesis.Cell wall organization and biogenesis.Cell wall metabolism.Cell wall catabolism.Cellulose catabolism
VIT_01s0146g00320	No hit	Cluster 1; R_up_day	Cluster 1; R_up_night	No hit
VIT_01s0146g00330	Hydroxyproline-rich glycoprotein family protein	Cluster 1; R_up_day	Cluster 1; R_up_night	Cellular process.Cellular component organization and biogenesis.Cell wall organization and biogenesis.Cell wall structural protein
VIT_01s0146g00350	Somatic embryogenesis protein kinase	Cluster 1; R_up_day	Cluster 1; R_up_night	Signaling.Signaling pathway.Protein kinase
VIT_01s0146g00430	No hit	Cluster 1; R_up_day	Cluster 1; R_up_night	No hit
VIT_01s0150g00380	Unknown protein	Cluster 1; R_up_day	Cluster 1; R_up_night	Unknown
VIT_01s0150g00410	Unknown protein	Cluster 1; R_up_day	Cluster 1; R_up_night	Unknown
VIT_02s0012g00490	Cytochrome c oxidase subunit 6b	Cluster 1; R_up_day	Cluster 1; R_up_night	Metabolism.Primary metabolism.Generation of metabolite precursors and energy.Electron transport.Respiratory-chain phosphorylation	Transport overview.Primary Active Transporters.Oxidoreduction-driven transporters.Proton-translocating Cyt Oxidase
VIT_02s0012g00630	Myb family	Cluster 1; R_up_day	Cluster 1; R_up_night	Regulation overview.Regulation of gene expression.Regulation of transcription.Transcription factor.MYB-related family transcription factor
VIT_02s0012g00820	Unknown	Cluster 1; R_up_day	Cluster 1; R_up_night	Unknown
VIT_02s0012g00880	AT-hook DNA-binding protein	Cluster 1; R_up_day	Cluster 1; R_up_night	Unknown
VIT_02s0012g00970	Cu2+-exporting ATPase HMA5 (heavy metal ATPase 5)	Cluster 1; R_up_day	Cluster 1; R_up_night	Transport overview.Primary Active Transporters.P-P-bond hydrolysis-driven transporters.P-type ATPase (P-ATPase).Cu2+-exporting ATPase	Regulation overview.Regulation of gene expression.Regulation of transcription.Transcription factor.TRAF	Cellular process.Cellular homeostasis.Heavy metal ion homeostasis.Copper homeostasis	Transport overview.Ion transport.Cation transport.Heavy metal ion transport.Copper transport
VIT_02s0012g01500	NADH dehydrogenase (ubiquinone) flavoprotein 2	Cluster 1; R_up_day	Cluster 1; R_up_night	Metabolism.Primary metabolism.Generation of metabolite precursors and energy.Electron transport.Respiratory-chain phosphorylation	Transport overview.Primary Active Transporters.Oxidoreduction-driven transporters.Proton-translocating NADH Dehydrogenase
VIT_02s0012g01600	No hit	Cluster 1; R_up_day	Cluster 1; R_up_night	No hit
VIT_02s0012g01770	Rad1	Cluster 1; R_up_day	Cluster 1; R_up_night	Metabolism.Primary metabolism.Nucleobase, nucleoside, nucleotide, nucleic acid metabolism.Nucleic acid metabolism.DNA metabolism
VIT_02s0012g01940	Myb KAN2 (KANADI 2)	Cluster 1; R_up_day	Cluster 1; R_up_night	Regulation overview.Regulation of gene expression.Regulation of transcription.Transcription factor.G2-like family transcription factor
VIT_02s0012g01970	No hit	Cluster 1; R_up_day	Cluster 1; R_up_night	No hit
VIT_02s0012g01980	Valyl tRNA synthetase	Cluster 1; R_up_day	Cluster 1; R_up_night	Metabolism.Primary metabolism.Amino acid metabolism.Valine, leucine, and isoleucine metabolism.Valine, leucine, and isoleucine biosynthesis	Metabolism.Primary metabolism.Nucleobase, nucleoside, nucleotide, nucleic acid metabolism.Nucleic acid metabolism.RNA metabolism.tRNA metabolism.tRNA processing	Metabolism.Primary metabolism.Protein metabolism and modification.Protein synthesis.Translation.Amino acid activation
VIT_02s0012g01990	4-hydroxyphenylpyruvate dioxygenase	Cluster 1; R_up_day	Cluster 1; R_up_night	Metabolism.Primary metabolism.Amino acid metabolism.Aromatic amino acid metabolism.Tyrosine metabolism.Tyrosine catabolism	Metabolism.Primary metabolism.Amino acid metabolism.Aromatic amino acid metabolism.Phenylalanine metabolism.Phenylalanine biosynthesis	Metabolism.Primary metabolism.Amino acid metabolism.Amino acid catabolism	Metabolism.Secondary metabolism.Terpenoid metabolism.Terpenoid biosynthesis.Terpenoid-quinone biosynthesis
VIT_02s0012g02090	Unknown protein	Cluster 1; R_up_day	Cluster 1; R_up_night	Unknown
VIT_02s0012g02210	No hit	Cluster 1; R_up_day	Cluster 1; R_up_night	No hit
VIT_02s0012g02360	CYP76J1	Cluster 1; R_up_day	Cluster 1; R_up_night	Metabolism.Cellular metabolism.Oxidation reduction.Cytochrome P450 oxidoreductase
VIT_02s0012g02380	Geraniol 10-hydroxylase	Cluster 1; R_up_day	Cluster 1; R_up_night	Metabolism.Secondary metabolism.Terpenoid metabolism.Monoterpenoid metabolism.Monoterpenoid biosynthesis	Metabolism.Secondary metabolism.Primary amino acids derivated metabolism.Alkaloid metabolism.Alkaloid biosynthesis.Monoterpenoid indole alkaloid metabolism.Monoterpenoid indole alkaloid biosynthesis
VIT_02s0012g02400	No hit	Cluster 1; R_up_day	Cluster 1; R_up_night	No hit
VIT_02s0012g02450	No hit	Cluster 1; R_up_day	Cluster 1; R_up_night	No hit
VIT_02s0012g02580	No hit	Cluster 1; R_up_day	Cluster 1; R_up_night	No hit
VIT_02s0012g02640	Aspartic-type endopeptidase	Cluster 1; R_up_day	Cluster 1; R_up_night	Metabolism.Primary metabolism.Protein metabolism and modification.Proteolysis.Peptidase-mediated proteolysis
VIT_02s0012g02650	Purple acid phosphatase 2 PAP2	Cluster 1; R_up_day	Cluster 1; R_up_night	Metabolism.Primary metabolism.Coenzyme and prosthetic group metabolism.Riboflavin metabolism	Metabolism.Cellular metabolism.Phosphate metabolism
VIT_02s0012g02770	ABC transporter g family pleiotropic drug resistance 12 PDR12	Cluster 1; R_up_day	Cluster 1; R_up_night	Transport overview.Macromolecule transport.Multidrug transport.Multidrug ABC transport
VIT_02s0012g02810	CYP76C4	Cluster 1; R_up_day	Cluster 1; R_up_night	Metabolism.Cellular metabolism.Oxidation reduction.Cytochrome P450 oxidoreductase
VIT_02s0012g02820	Geraniol 10-hydroxylase	Cluster 1; R_up_day	Cluster 1; R_up_night	Metabolism.Secondary metabolism.Terpenoid metabolism.Monoterpenoid metabolism.Monoterpenoid biosynthesis	Metabolism.Secondary metabolism.Primary amino acids derivated metabolism.Alkaloid metabolism.Alkaloid biosynthesis.Monoterpenoid indole alkaloid metabolism.Monoterpenoid indole alkaloid biosynthesis
VIT_02s0012g03040	AAA-type ATPase	Cluster 1; R_up_day	Cluster 1; R_up_night	Diverse functions.Gene family with diverse functions.AAA-type ATPase domain family
VIT_02s0012g03060	6-phosphogluconate dehydrogenase	Cluster 1; R_up_day	Cluster 1; R_up_night	Metabolism.Primary metabolism.Carbohydrate metabolism.Monosaccharide metabolism.Monosaccharide catabolism.Pentose-phosphate shunt
VIT_02s0025g00010	No hit	Cluster 1; R_up_day	Cluster 1; R_up_night	No hit
VIT_02s0025g00500	Unknown protein	Cluster 1; R_up_day	Cluster 1; R_up_night	Unknown
VIT_02s0025g00530	Unknown	Cluster 1; R_up_day	Cluster 1; R_up_night	Unknown
VIT_02s0025g00540	Unknown	Cluster 1; R_up_day	Cluster 1; R_up_night	Unknown
VIT_02s0025g00600	Glycoside hydrolase	Cluster 1; R_up_day	Cluster 1; R_up_night	Metabolism.Primary metabolism.Carbohydrate metabolism.Carbohydrate catabolism
VIT_02s0025g00610	Glycoside hydrolase	Cluster 1; R_up_day	Cluster 1; R_up_night	Metabolism.Primary metabolism.Carbohydrate metabolism.Carbohydrate catabolism
VIT_02s0025g00780	Cation/hydrogen exchanger (CHX18)	Cluster 1; R_up_day	Cluster 1; R_up_night	Transport overview.Electrochemical Potential-driven Transporters.Porters.Monovalent Cation:Proton Antiporter-2	Transport overview.Ion transport.Cation transport.Proton transport
VIT_02s0025g00800	Cation/hydrogen exchanger (CHX18)	Cluster 1; R_up_day	Cluster 1; R_up_night	Transport overview.Electrochemical Potential-driven Transporters.Porters.Monovalent Cation:Proton Antiporter-2	Transport overview.Ion transport.Cation transport.Proton transport
VIT_02s0025g00820	Cation/hydrogen exchanger (CHX18)	Cluster 1; R_up_day	Cluster 1; R_up_night	Transport overview.Electrochemical Potential-driven Transporters.Porters.Monovalent Cation:Proton Antiporter-2	Transport overview.Ion transport.Cation transport.Proton transport
VIT_02s0025g00960	V-type H+-transporting ATPase subunit E	Cluster 1; R_up_day	Cluster 1; R_up_night	Metabolism.Primary metabolism.Generation of metabolite precursors and energy.Electron transport.Respiratory-chain phosphorylation	Transport overview.Primary Active Transporters.P-P-bond hydrolysis-driven transporters.H+ or Na+ trsloc F-t, V-t and A-t ATPase	Transport overview.Ion transport.Cation transport.Proton transport	Cellular process.Cellular transport.Protein trafficking.Vesicle-mediated trafficking.Phagosome
VIT_02s0025g01180	Carrier protein	Cluster 1; R_up_day	Cluster 1; R_up_night	Transport overview.Electrochemical Potential-driven Transporters.Porters.Mitochondrial Carrier	Transport overview.Mitochondrial membrane transport
VIT_02s0025g01230	Amino acid permease	Cluster 1; R_up_day	Cluster 1; R_up_night	Transport overview.Electrochemical Potential-driven Transporters.Porters.Amino Acid/Auxin Permease	Transport overview.Macromolecule transport.Amino acid transport
VIT_02s0025g01400	Leucine-rich repeat family protein stress	Cluster 1; R_up_day	Cluster 1; R_up_night	Diverse functions.Gene family with diverse functions.NBS-LRR superfamily
VIT_02s0025g01430	Zinc finger (C3HC4-type ring finger) family protein ATL1E	Cluster 1; R_up_day	Cluster 1; R_up_night	Regulation overview.Regulation of gene expression.Regulation of transcription.Transcription factor.Zinc finger C3HC4 family transcription factor
VIT_02s0025g01450	Unknown protein	Cluster 1; R_up_day	Cluster 1; R_up_night	Unknown
VIT_02s0025g01880	Cellulose synthase CSLG3	Cluster 1; R_up_day	Cluster 1; R_up_night	Cellular process.Cellular component organization and biogenesis.Cell wall organization and biogenesis.Cell wall metabolism.Cell wall biosynthesis.Cellulose biosynthesis
VIT_02s0025g01890	Cellulose synthase CSLG3	Cluster 1; R_up_day	Cluster 1; R_up_night	Cellular process.Cellular component organization and biogenesis.Cell wall organization and biogenesis.Cell wall metabolism.Cell wall biosynthesis.Cellulose biosynthesis
VIT_02s0025g01940	Cellulose synthase CSLG3	Cluster 1; R_up_day	Cluster 1; R_up_night	Cellular process.Cellular component organization and biogenesis.Cell wall organization and biogenesis.Cell wall metabolism.Cell wall biosynthesis.Cellulose biosynthesis
VIT_02s0025g02030	No hit	Cluster 1; R_up_day	Cluster 1; R_up_night	No hit
VIT_02s0025g02040	Unknown protein	Cluster 1; R_up_day	Cluster 1; R_up_night	Unknown
VIT_02s0025g02470	Unknown protein	Cluster 1; R_up_day	Cluster 1; R_up_night	Unknown
VIT_02s0025g02510	Metal-nicotianamine transporter YSL1	Cluster 1; R_up_day	Cluster 1; R_up_night	Transport overview.Electrochemical Potential-driven Transporters.Porters.Oligopeptide Transporter	Transport overview.Macromolecule transport.Oligopeptide transport
VIT_02s0025g02560	O-succinylhomoserine sulfhydrylase	Cluster 1; R_up_day	Cluster 1; R_up_night	Metabolism.Primary metabolism.Amino acid metabolism.Methionine metabolism	Metabolism.Primary metabolism.Amino acid metabolism.Cysteine metabolism	Metabolism.Cellular metabolism.Amino acid derivative metabolism.Selenoamino acid metabolism	Metabolism.Cellular metabolism.Nitrogen and sulfur metabolism.Sulfur metabolism.Sulfate assimilation	Metabolism.Primary metabolism.Amino acid metabolism.Cysteine and methionine metabolism
VIT_02s0025g02810	Pyruvate dehydrogenase E1 component alpha subunit	Cluster 1; R_up_day	Cluster 1; R_up_night	Metabolism.Primary metabolism.Carbohydrate metabolism.Glycolysis Gluconeogenesis	Metabolism.Primary metabolism.Amino acid metabolism.Alanine and aspartate metabolism	Metabolism.Primary metabolism.Amino acid metabolism.Valine, leucine, and isoleucine metabolism.Valine, leucine, and isoleucine biosynthesis	Metabolism.Primary metabolism.Carbohydrate metabolism.Monosaccharide metabolism.Pyruvate metabolism	Metabolism.Primary metabolism.Organic acid metabolism.Butanoate metabolism	Signaling.Hormone Signaling.Auxin Signaling.Auxin metabolism
VIT_02s0025g02940	Caffeic acid O-3-methyltransferase	Cluster 1; R_up_day	Cluster 1; R_up_night	Metabolism.Secondary metabolism.Phenylpropanoid metabolism.Phenylpropanoid biosynthesis
VIT_02s0025g02960	Naringenin	Cluster 1; R_up_day	Cluster 1; R_up_night	Metabolism.Secondary metabolism.Phenylpropanoid metabolism.Flavonoid metabolism.Flavonoid biosynthesis
VIT_02s0025g03300	Potassium channel tetramerisation domain-containing protein	Cluster 1; R_up_day	Cluster 1; R_up_night	Transport overview.Channels and pores.a-Type channels.The Voltage-gated Ion Channel	Transport overview.Ion transport.Cation transport.Potassium transport
VIT_02s0025g03730	Translation initiation factor eIF-2B alpha subunit	Cluster 1; R_up_day	Cluster 1; R_up_night	Metabolism.Primary metabolism.Protein metabolism and modification.Protein synthesis.Translation.Translational initiation	Transport overview.Macromolecule transport.RNA transport
VIT_02s0025g03740	Translation initiation factor eIF-2B alpha subunit	Cluster 1; R_up_day	Cluster 1; R_up_night	Metabolism.Primary metabolism.Protein metabolism and modification.Protein synthesis.Translation.Translational initiation	Transport overview.Macromolecule transport.RNA transport
VIT_02s0025g03820	Potassium transporter 2	Cluster 1; R_up_day	Cluster 1; R_up_night	Transport overview.Electrochemical Potential-driven Transporters.Porters.K+ uptake porter (aka permease)	Transport overview.Ion transport.Cation transport.Potassium transport
VIT_02s0025g03960	TET10 (tetraspanin10)	Cluster 1; R_up_day	Cluster 1; R_up_night	Development.Senescence
VIT_02s0025g04050	Rab/Ypt GTPase Ara4-interacting protein	Cluster 1; R_up_day	Cluster 1; R_up_night	Signaling.Signaling pathway.G-protein signaling pathway.RAB-GTPase regulation
VIT_02s0025g04290	Thaumatin	Cluster 1; R_up_day	Cluster 1; R_up_night	Response to stimulus.Stress response
VIT_02s0033g00150	No hit	Cluster 1; R_up_day	Cluster 1; R_up_night	No hit
VIT_02s0033g00160	Pleckstriny (PH) domain-containing protein	Cluster 1; R_up_day	Cluster 1; R_up_night	Unclear
VIT_02s0033g00370	Myb domain protein 113	Cluster 1; R_up_day	Cluster 1; R_up_night	Regulation overview.Regulation of gene expression.Regulation of transcription.Transcription factor.MYB family transcription factor
VIT_02s0033g00380	Myb VvMYBA1	Cluster 1; R_up_day	Cluster 1; R_up_night	Regulation overview.Regulation of gene expression.Regulation of transcription.Transcription factor.MYB family transcription factor
VIT_02s0033g00390	Myb domain protein 113	Cluster 1; R_up_day	Cluster 1; R_up_night	Regulation overview.Regulation of gene expression.Regulation of transcription.Transcription factor.MYB family transcription factor
VIT_02s0033g00400	Myb domain protein 113	Cluster 1; R_up_day	Cluster 1; R_up_night	Regulation overview.Regulation of gene expression.Regulation of transcription.Transcription factor.MYB family transcription factor
VIT_02s0033g00410	Myb VvMYBA1	Cluster 1; R_up_day	Cluster 1; R_up_night	Regulation overview.Regulation of gene expression.Regulation of transcription.Transcription factor.MYB family transcription factor
VIT_02s0033g00430	Myb domain protein 113	Cluster 1; R_up_day	Cluster 1; R_up_night	Regulation overview.Regulation of gene expression.Regulation of transcription.Transcription factor.MYB family transcription factor
VIT_02s0033g00440	Myb VvMYBA1	Cluster 1; R_up_day	Cluster 1; R_up_night	Regulation overview.Regulation of gene expression.Regulation of transcription.Transcription factor.MYB family transcription factor
VIT_02s0033g00450	Myb VvMYBA3 [Vitis vinifera]	Cluster 1; R_up_day	Cluster 1; R_up_night	Regulation overview.Regulation of gene expression.Regulation of transcription.Transcription factor.MYB family transcription factor
VIT_02s0033g00630	Nitrilase	Cluster 1; R_up_day	Cluster 1; R_up_night	Metabolism.Cellular metabolism.Amino acid derivative metabolism.Cyanoamino acid metabolism	Metabolism.Cellular metabolism.Nitrogen and sulfur metabolism.Nitrogen metabolism	Signaling.Hormone Signaling.Auxin Signaling.Auxin metabolism
VIT_02s0033g00660	Nitrilase 4B	Cluster 1; R_up_day	Cluster 1; R_up_night	Metabolism.Cellular metabolism.Amino acid derivative metabolism.Cyanoamino acid metabolism	Metabolism.Cellular metabolism.Nitrogen and sulfur metabolism.Nitrogen metabolism	Signaling.Hormone Signaling.Auxin Signaling.Auxin metabolism
VIT_02s0033g00670	Nitrilase 4B	Cluster 1; R_up_day	Cluster 1; R_up_night	Metabolism.Cellular metabolism.Amino acid derivative metabolism.Cyanoamino acid metabolism	Metabolism.Cellular metabolism.Nitrogen and sulfur metabolism.Nitrogen metabolism	Signaling.Hormone Signaling.Auxin Signaling.Auxin metabolism
VIT_02s0033g00700	Nitrilase	Cluster 1; R_up_day	Cluster 1; R_up_night	Metabolism.Cellular metabolism.Amino acid derivative metabolism.Cyanoamino acid metabolism	Metabolism.Cellular metabolism.Nitrogen and sulfur metabolism.Nitrogen metabolism	Signaling.Hormone Signaling.Auxin Signaling.Auxin metabolism
VIT_02s0033g00710	No hit	Cluster 1; R_up_day	Cluster 1; R_up_night	No hit
VIT_02s0033g00730	Papain cysteine proteinase isoform I	Cluster 1; R_up_day	Cluster 1; R_up_night	Metabolism.Primary metabolism.Protein metabolism and modification.Proteolysis.Peptidase-mediated proteolysis
VIT_02s0033g00770	Nitrilase 4B	Cluster 1; R_up_day	Cluster 1; R_up_night	Metabolism.Cellular metabolism.Amino acid derivative metabolism.Cyanoamino acid metabolism	Metabolism.Cellular metabolism.Nitrogen and sulfur metabolism.Nitrogen metabolism	Signaling.Hormone Signaling.Auxin Signaling.Auxin metabolism
VIT_02s0033g00790	Nitrilase 4B	Cluster 1; R_up_day	Cluster 1; R_up_night	Metabolism.Cellular metabolism.Amino acid derivative metabolism.Cyanoamino acid metabolism	Metabolism.Cellular metabolism.Nitrogen and sulfur metabolism.Nitrogen metabolism	Signaling.Hormone Signaling.Auxin Signaling.Auxin metabolism
VIT_02s0033g00800	Nitrilase 4 (NIT4)	Cluster 1; R_up_day	Cluster 1; R_up_night	Metabolism.Cellular metabolism.Nitrogen and sulfur metabolism.Nitrogen metabolism	Signaling.Hormone Signaling.Auxin Signaling.Auxin metabolism
VIT_02s0033g00840	Nitrilase 4B	Cluster 1; R_up_day	Cluster 1; R_up_night	Metabolism.Cellular metabolism.Amino acid derivative metabolism.Cyanoamino acid metabolism	Metabolism.Cellular metabolism.Nitrogen and sulfur metabolism.Nitrogen metabolism	Signaling.Hormone Signaling.Auxin Signaling.Auxin metabolism
VIT_02s0033g00850	Nitrilase	Cluster 1; R_up_day	Cluster 1; R_up_night	Metabolism.Cellular metabolism.Amino acid derivative metabolism.Cyanoamino acid metabolism	Metabolism.Cellular metabolism.Nitrogen and sulfur metabolism.Nitrogen metabolism	Signaling.Hormone Signaling.Auxin Signaling.Auxin metabolism
VIT_02s0033g00870	Nitrilase 4B	Cluster 1; R_up_day	Cluster 1; R_up_night	Metabolism.Cellular metabolism.Amino acid derivative metabolism.Cyanoamino acid metabolism	Metabolism.Cellular metabolism.Nitrogen and sulfur metabolism.Nitrogen metabolism	Signaling.Hormone Signaling.Auxin Signaling.Auxin metabolism
VIT_02s0033g00900	Unc51-like kinase	Cluster 1; R_up_day	Cluster 1; R_up_night	Metabolism.Cellular metabolism.Cellular catabolism.Autophagy	Signaling.Signaling pathway.TOR Signaling pathway	Signaling.Signaling pathway.Protein kinase
VIT_02s0033g01070	Anthraniloyal-CoA: methanol anthraniloyal transferase	Cluster 1; R_up_day	Cluster 1; R_up_night	Metabolism.Primary metabolism.Amino acid metabolism.Aromatic amino acid metabolism.Aromatic amino acid biosynthesis	Metabolism.Secondary metabolism.Aromatic compound metabolism.Aromatic compound biosynthesis
VIT_02s0033g01130	SAR1 (secretion-associated ras)	Cluster 1; R_up_day	Cluster 1; R_up_night	Transport overview.Macromolecule transport.Protein transport.Protein coat	Cellular process.Cellular transport.Protein trafficking.Vesicle-mediated trafficking	Metabolism.Primary metabolism.Protein metabolism and modification.Protein processing in endoplasmic reticulum
VIT_02s0033g01220	No hit	Cluster 1; R_up_day	Cluster 1; R_up_night	No hit
VIT_02s0033g01320	Amino acid permease	Cluster 1; R_up_day	Cluster 1; R_up_night	Transport overview.Electrochemical Potential-driven Transporters.Porters.Amino Acid/Auxin Permease	Transport overview.Macromolecule transport.Amino acid transport
VIT_02s0033g01340	Unknown protein	Cluster 1; R_up_day	Cluster 1; R_up_night	Unknown
VIT_02s0087g00140	Transcription factor	Cluster 1; R_up_day	Cluster 1; R_up_night	Regulation overview.Regulation of gene expression.Regulation of transcription.Transcription factor.Trihelix family transcription factor
VIT_02s0087g00310	No hit	Cluster 1; R_up_day	Cluster 1; R_up_night	No hit
VIT_02s0087g00450	Anthranilate phosphoribosyltransferase	Cluster 1; R_up_day	Cluster 1; R_up_night	Metabolism.Primary metabolism.Amino acid metabolism.Aromatic amino acid metabolism.Aromatic amino acid biosynthesis	Metabolism.Primary metabolism.Amino acid metabolism.Amino acid biosynthesis	Metabolism.Primary metabolism.Amino acid metabolism.Aromatic amino acid metabolism.Tryptophan metabolism.Tryptophan biosynthesis
VIT_02s0087g00710	ABA 8'-hydroxylase CYP707A1	Cluster 1; R_up_day	Cluster 1; R_up_night	Metabolism.Secondary metabolism.Terpenoid metabolism.Tetraterpenoid metabolism.Tetraterpenoid biosynthesis.Carotenoid biosynthesis	Signaling.Hormone Signaling.ABA Signaling.ABA metabolism.ABA biosynthesis	Signaling.Hormone Signaling.ABA Signaling.ABA-mediated Signaling pathway	Signaling.Hormone Signaling.ABA Signaling.ABA metabolism.ABA catabolism
VIT_02s0087g00870	Sulfate transporter 4.2	Cluster 1; R_up_day	Cluster 1; R_up_night	Transport overview.Electrochemical Potential-driven Transporters.Porters.Sulfate Permease	Transport overview.Ion transport.Anion transport.Sulfate transport
VIT_02s0087g00930	9-cis-epoxycarotenoid dioxygenase	Cluster 1; R_up_day	Cluster 1; R_up_night	Metabolism.Secondary metabolism.Terpenoid metabolism.Tetraterpenoid metabolism.Tetraterpenoid biosynthesis.Carotenoid biosynthesis	Signaling.Hormone Signaling.ABA Signaling.ABA metabolism.ABA biosynthesis	Signaling.Hormone Signaling.ABA Signaling.ABA-mediated Signaling pathway
VIT_02s0109g00180	No hit	Cluster 1; R_up_day	Cluster 1; R_up_night	No hit
VIT_02s0109g00230	Early-responsive to dehydration protein / ERD protein	Cluster 1; R_up_day	Cluster 1; R_up_night	Response to stimulus.Stress response.Abiotic stress response.Drought stress response
VIT_02s0109g00240	No hit	Cluster 1; R_up_day	Cluster 1; R_up_night	No hit
VIT_02s0109g00250	4-coumarate-CoA ligase	Cluster 1; R_up_day	Cluster 1; R_up_night	Metabolism.Secondary metabolism.Phenylpropanoid metabolism.Phenylpropanoid biosynthesis	Transport overview.Group translocators.Acyl CoA ligase-coupled transporters.Proposed Fatty Acid Transporter
VIT_02s0109g00430	Nitrilase 4 (NIT4)	Cluster 1; R_up_day	Cluster 1; R_up_night	Metabolism.Cellular metabolism.Nitrogen and sulfur metabolism.Nitrogen metabolism	Signaling.Hormone Signaling.Auxin Signaling.Auxin metabolism
VIT_02s0154g00190	flavin-containing monooxygenase 3	Cluster 1; R_up_day	Cluster 1; R_up_night	Metabolism.single reactions	Metabolism.Cellular metabolism.Oxidation reduction.Flavin-containing monooxygenase
VIT_02s0234g00100	Ubiquitinyl hydrolase 1	Cluster 1; R_up_day	Cluster 1; R_up_night	Metabolism.Primary metabolism.Protein metabolism and modification.Proteolysis.cytoplasmic and nuclear protein degradation.Ubiquitin-mediated proteolysis
VIT_02s0236g00070	Unknown	Cluster 1; R_up_day	Cluster 1; R_up_night	Unknown
VIT_02s0236g00090	Unknown	Cluster 1; R_up_day	Cluster 1; R_up_night	Unknown
VIT_02s0241g00080	Glycine-rich protein-like	Cluster 1; R_up_day	Cluster 1; R_up_night	Unknown
VIT_03s0017g00220	Adaptor-related protein complex 2	Cluster 1; R_up_day	Cluster 1; R_up_night	Transport overview.Macromolecule transport.Protein transport.Protein coat	Cellular process.Cellular transport.Protein trafficking.Vesicle-mediated trafficking
VIT_03s0017g00330	No hit	Cluster 1; R_up_day	Cluster 1; R_up_night	No hit
VIT_03s0017g00380	Unknown	Cluster 1; R_up_day	Cluster 1; R_up_night	Unknown
VIT_03s0017g00600	Calmodulin binding heat shock protein	Cluster 1; R_up_day	Cluster 1; R_up_night	Signaling.Signaling pathway.Calcium sensors and Signaling
VIT_03s0017g00630	No hit	Cluster 1; R_up_day	Cluster 1; R_up_night	No hit
VIT_03s0017g00780	Disease resistance protein (TIR-NBS-LRR class)	Cluster 1; R_up_day	Cluster 1; R_up_night	Diverse functions.Gene family with diverse functions.NBS-LRR superfamily	Response to stimulus.Stress response.Biotic stress response
VIT_03s0017g00870	Transferase family	Cluster 1; R_up_day	Cluster 1; R_up_night	Unknown
VIT_03s0017g01310	Ribosomal protein S17 (RPS17D) 40S	Cluster 1; R_up_day	Cluster 1; R_up_night	Metabolism.Primary metabolism.Protein metabolism and modification.Protein synthesis.Ribosome
VIT_03s0017g01400	Adhesive/proline-rich protein	Cluster 1; R_up_day	Cluster 1; R_up_night	Metabolism.Primary metabolism.Carbohydrate metabolism.Monosaccharide metabolism.Nucleotide sugar metabolism
VIT_03s0017g01440	Berberine bridge enzyme	Cluster 1; R_up_day	Cluster 1; R_up_night	Metabolism.Secondary metabolism.Primary amino acids derivated metabolism.Alkaloid metabolism.Alkaloid biosynthesis
VIT_03s0017g01490	Berberine bridge enzyme	Cluster 1; R_up_day	Cluster 1; R_up_night	Metabolism.Secondary metabolism.Primary amino acids derivated metabolism.Alkaloid metabolism.Alkaloid biosynthesis
VIT_03s0017g01520	Peptidyl-prolyl cis-trans isomerase ROC7 (rotamase CYP 7)	Cluster 1; R_up_day	Cluster 1; R_up_night	Metabolism.Primary metabolism.Protein metabolism and modification.Protein folding.Peptidyl prolyl isomerase-mediated protein folding
VIT_03s0017g01560	Peptidyl-prolyl cis-trans isomerase	Cluster 1; R_up_day	Cluster 1; R_up_night	Metabolism.Primary metabolism.Protein metabolism and modification.Protein folding.Peptidyl prolyl isomerase-mediated protein folding
VIT_03s0017g01570	FAD-binding domain-containing protein	Cluster 1; R_up_day	Cluster 1; R_up_night	Unclear
VIT_03s0017g01850	No hit	Cluster 1; R_up_day	Cluster 1; R_up_night	No hit
VIT_03s0017g01990	UDP-glucose glucosyltransferase	Cluster 1; R_up_day	Cluster 1; R_up_night	Metabolism.Primary metabolism.Carbohydrate metabolism.Polysaccharide metabolism.Starch and sucrose metabolism	Metabolism.Secondary metabolism.Aromatic compound metabolism.Aromatic compound glysosylation
VIT_03s0017g02020	Unknown	Cluster 1; R_up_day	Cluster 1; R_up_night	Unknown
VIT_03s0017g02050	No hit	Cluster 1; R_up_day	Cluster 1; R_up_night	No hit
VIT_03s0017g02070	Unknown	Cluster 1; R_up_day	Cluster 1; R_up_night	Unknown
VIT_03s0017g02130	Zinc finger (C2H2 type) family	Cluster 1; R_up_day	Cluster 1; R_up_night	Regulation overview.Regulation of gene expression.Regulation of transcription.Transcription factor.C2H2 family transcription factor
VIT_03s0017g02170	Zinc transporter ZIP5	Cluster 1; R_up_day	Cluster 1; R_up_night	Transport overview.Electrochemical Potential-driven Transporters.Porters.Zinc (Zn2+)-Iron (Fe2+) Permease	Transport overview.Ion transport.Cation transport.Heavy metal ion transport.Zinc transport
VIT_03s0017g02190	ZIP family transporter	Cluster 1; R_up_day	Cluster 1; R_up_night	Transport overview.Electrochemical Potential-driven Transporters.Porters.Zinc (Zn2+)-Iron (Fe2+) Permease	Transport overview.Ion transport.Cation transport.Heavy metal ion transport
VIT_03s0017g02350	Naringenin 3-dioxygenase	Cluster 1; R_up_day	Cluster 1; R_up_night	Metabolism.Secondary metabolism.Phenylpropanoid metabolism.Flavonoid metabolism.Flavonoid biosynthesis
VIT_03s0038g00070	No hit	Cluster 1; R_up_day	Cluster 1; R_up_night	No hit
VIT_03s0038g00090	Epoxide hydrolase-like protein	Cluster 1; R_up_day	Cluster 1; R_up_night	Metabolism.Cellular metabolism.Epoxide hydrolase family	Response to stimulus.Stress response.Biotic stress response
VIT_03s0038g00560	No hit	Cluster 1; R_up_day	Cluster 1; R_up_night	No hit
VIT_03s0038g00590	Unknown protein	Cluster 1; R_up_day	Cluster 1; R_up_night	Unknown
VIT_03s0038g00770	No hit	Cluster 1; R_up_day	Cluster 1; R_up_night	No hit
VIT_03s0038g00820	3-oxo-5-alpha-steroid 4-dehydrogenase	Cluster 1; R_up_day	Cluster 1; R_up_night	Signaling.Hormone Signaling.Brassinosteroid Signaling.Brassinosteroid metabolism.Brassinosteroid biosynthesis	Metabolism.Primary metabolism.Lipid metabolism.Steroid metabolism
VIT_03s0038g00850	Early-responsive to dehydration protein	Cluster 1; R_up_day	Cluster 1; R_up_night	Response to stimulus.Stress response.Abiotic stress response.Drought stress response
VIT_03s0038g01310	Auxin responsive SAUR protein	Cluster 1; R_up_day	Cluster 1; R_up_night	Signaling.Hormone Signaling.Auxin Signaling.Auxin-mediated Signaling pathway	Signaling.Hormone Signaling.Auxin Signaling.Auxin responsive
VIT_03s0038g01380	Calcium-binding EF hand	Cluster 1; R_up_day	Cluster 1; R_up_night	Unknown
VIT_03s0038g01470	ER lumen protein retaining receptor	Cluster 1; R_up_day	Cluster 1; R_up_night	Cellular process.Cellular transport.Protein trafficking
VIT_03s0038g01990	Amidase	Cluster 1; R_up_day	Cluster 1; R_up_night	Metabolism.Primary metabolism.Amino acid metabolism.Arginine and proline metabolism.Urea cycle	Metabolism.Primary metabolism.Amino acid metabolism.Aromatic amino acid metabolism.Phenylalanine metabolism.Phenylalanine biosynthesis	Signaling.Hormone Signaling.Auxin Signaling.Auxin metabolism	Transport overview.Primary Active Transporters.P-P-bond hydrolysis-driven transporters.Chloroplast Env Prot Translocase	Metabolism.Cellular metabolism.Nitrogen and sulfur metabolism.Nitrogen metabolism.Amine metabolism
VIT_03s0038g02110	Co-chaperone-curved DNA binding protein A	Cluster 1; R_up_day	Cluster 1; R_up_night	Transport overview.Primary Active Transporters.P-P-bond hydrolysis-driven transporters.General Secretory Pathway (Sec)	Metabolism.Primary metabolism.Protein metabolism and modification.Protein folding.Chaperone-mediated protein folding.HSP-mediated protein folding.HSP-mediated protein folding co-chaperone
VIT_03s0038g02190	Nodulin	Cluster 1; R_up_day	Cluster 1; R_up_night	Response to stimulus.Stress response.Biotic stress response
VIT_03s0038g02850	Protein phosphatase 2 (formerly 2A)	Cluster 1; R_up_day	Cluster 1; R_up_night	Signaling.Signaling pathway.Calcium sensors and Signaling	Metabolism.Primary metabolism.Nucleobase, nucleoside, nucleotide, nucleic acid metabolism.Nucleic acid metabolism.RNA metabolism.RNA catabolism.RNA surveillance
VIT_03s0038g02880	Unknown	Cluster 1; R_up_day	Cluster 1; R_up_night	Unknown
VIT_03s0038g03180	flavin-containing monooxygenase 1	Cluster 1; R_up_day	Cluster 1; R_up_night	Metabolism.single reactions	Metabolism.Cellular metabolism.Oxidation reduction.Flavin-containing monooxygenase
VIT_03s0038g03190	Flavin containing monooxygenase 3	Cluster 1; R_up_day	Cluster 1; R_up_night	Metabolism.single reactions	Metabolism.Cellular metabolism.Oxidation reduction.Flavin-containing monooxygenase
VIT_03s0038g03430	Beta-expansin (EXPL2)	Cluster 1; R_up_day	Cluster 1; R_up_night	Signaling.Hormone Signaling.Auxin Signaling.Auxin-mediated Signaling pathway	Cellular process.Cellular component organization and biogenesis.Cell wall organization and biogenesis.Cell wall metabolism.Cell wall modification
VIT_03s0038g03570	Monocopper oxidase SKS5 (SKU5 Similar 5)	Cluster 1; R_up_day	Cluster 1; R_up_night	Transport overview.Incompletely characterized transport systems.Recognized transporters of unknown biochemical mechanism.Iron/Lead Transporter.Oxidase-dep Fe2+ Transporter	Metabolism.Cellular metabolism.Oxidation reduction.Copper oxidase family
VIT_03s0038g03580	Lipase GDSL	Cluster 1; R_up_day	Cluster 1; R_up_night	Unclear
VIT_03s0038g04100	3-hydroxy-3-methylglutaryl-coenzyme A reductase 3	Cluster 1; R_up_day	Cluster 1; R_up_night	Metabolism.Primary metabolism.Lipid metabolism.Steroid metabolism.Steroid biosynthesis	Transport overview.Electrochemical Potential-driven Transporters.Porters.Resistance-Nodulation-Cell Division.Eukaryotic (Putative) Sterol Transporter	Metabolism.Secondary metabolism.Terpenoid metabolism.Terpenoid biosynthesis.Mevalonate biosynthesis
VIT_03s0038g04460	Myb family	Cluster 1; R_up_day	Cluster 1; R_up_night	Regulation overview.Regulation of gene expression.Regulation of transcription.Transcription factor.MYB-related family transcription factor
VIT_03s0038g04510	Chaperone BCS1 mitochondrial	Cluster 1; R_up_day	Cluster 1; R_up_night	Metabolism.Primary metabolism.Protein metabolism and modification.Protein folding.Chaperone-mediated protein folding
VIT_03s0038g04630	Isoflavone reductase related protein	Cluster 1; R_up_day	Cluster 1; R_up_night	Metabolism.Secondary metabolism.Phenylpropanoid metabolism.Flavonoid metabolism.Isoflavonoid metabolism.Isoflavonoid biosynthesis
VIT_03s0063g00360	Glycoprotein 3-alpha-L-fucosyltransferase	Cluster 1; R_up_day	Cluster 1; R_up_night	Metabolism.Primary metabolism.Carbohydrate metabolism.Oligosaccharide metabolism.Glycan metabolism.Glycan structures-biosynthesis1
VIT_03s0063g00410	Alpha-amylase	Cluster 1; R_up_day	Cluster 1; R_up_night	Metabolism.Primary metabolism.Carbohydrate metabolism.Polysaccharide metabolism.Starch and sucrose metabolism
VIT_03s0063g00450	Alpha-amylase	Cluster 1; R_up_day	Cluster 1; R_up_night	Metabolism.Primary metabolism.Carbohydrate metabolism.Polysaccharide metabolism.Starch and sucrose metabolism
VIT_03s0063g00580	Rad54	Cluster 1; R_up_day	Cluster 1; R_up_night	Metabolism.Primary metabolism.Nucleobase, nucleoside, nucleotide, nucleic acid metabolism.Nucleic acid metabolism.DNA metabolism.DNA recombination and repair.recombination	Regulation overview.Regulation of gene expression.Regulation of transcription.Transcription factor.SNF2 family transcription factor	Metabolism.Primary metabolism.Nucleobase, nucleoside, nucleotide, nucleic acid metabolism.Nucleic acid metabolism.DNA metabolism.DNA recombination and repair.repair
VIT_03s0063g00680	Zinc metalloprotease pitrilysin sub A	Cluster 1; R_up_day	Cluster 1; R_up_night	Metabolism.Primary metabolism.Protein metabolism and modification.Proteolysis.Peptidase-mediated proteolysis
VIT_03s0063g00740	Carboxylesterase CXE	Cluster 1; R_up_day	Cluster 1; R_up_night	Metabolism.Cellular metabolism.Esterase activity
VIT_03s0063g00990	Blue (type 1) copper domain	Cluster 1; R_up_day	Cluster 1; R_up_night	Unclassified
VIT_03s0063g01150	Nodulin 1A	Cluster 1; R_up_day	Cluster 1; R_up_night	Metabolism.Cellular metabolism.Nitrogen and sulfur metabolism.Nitrogen metabolism.Nitrogen assimilation
VIT_03s0063g01160	Nodulin 1A	Cluster 1; R_up_day	Cluster 1; R_up_night	Metabolism.Cellular metabolism.Nitrogen and sulfur metabolism.Nitrogen metabolism.Nitrogen assimilation
VIT_03s0063g01180	Gibberellin 20 oxidase 2	Cluster 1; R_up_day	Cluster 1; R_up_night	Metabolism.Secondary metabolism.Terpenoid metabolism.Diterpenoid metabolism.Diterpenoid biosynthesis	Signaling.Hormone Signaling.Gibberellic acid Signaling.Gibberellic acid metabolism.Gibberellic acid biosynthesis
VIT_03s0063g01210	Nodulin 1A	Cluster 1; R_up_day	Cluster 1; R_up_night	Metabolism.Cellular metabolism.Nitrogen and sulfur metabolism.Nitrogen metabolism.Nitrogen assimilation
VIT_03s0063g01250	Nodulin 1A	Cluster 1; R_up_day	Cluster 1; R_up_night	Metabolism.Cellular metabolism.Nitrogen and sulfur metabolism.Nitrogen metabolism.Nitrogen assimilation
VIT_03s0063g01280	Gibberellin 20 oxidase 2	Cluster 1; R_up_day	Cluster 1; R_up_night	Metabolism.Secondary metabolism.Terpenoid metabolism.Diterpenoid metabolism.Diterpenoid biosynthesis	Signaling.Hormone Signaling.Gibberellic acid Signaling.Gibberellic acid metabolism.Gibberellic acid biosynthesis
VIT_03s0063g01290	Gibberellin 20 oxidase 2	Cluster 1; R_up_day	Cluster 1; R_up_night	Metabolism.Secondary metabolism.Terpenoid metabolism.Diterpenoid metabolism.Diterpenoid biosynthesis	Signaling.Hormone Signaling.Gibberellic acid Signaling.Gibberellic acid metabolism.Gibberellic acid biosynthesis
VIT_03s0063g01300	No hit	Cluster 1; R_up_day	Cluster 1; R_up_night	No hit
VIT_03s0063g01310	Oxidoreductase	Cluster 1; R_up_day	Cluster 1; R_up_night	Metabolism.Cellular metabolism.Oxidation reduction.2OG-Fe(II) oxygenase superfamily
VIT_03s0063g01320	Nodulin 1A	Cluster 1; R_up_day	Cluster 1; R_up_night	Metabolism.Cellular metabolism.Nitrogen and sulfur metabolism.Nitrogen metabolism.Nitrogen assimilation
VIT_03s0063g01330	Nodulin 1A	Cluster 1; R_up_day	Cluster 1; R_up_night	Metabolism.Cellular metabolism.Nitrogen and sulfur metabolism.Nitrogen metabolism.Nitrogen assimilation
VIT_03s0063g01400	Cell division cycle associated 7 CDCA7	Cluster 1; R_up_day	Cluster 1; R_up_night	Cellular process.Cell growth and death	Regulation overview.Regulation of cell cycle
VIT_03s0063g01500	CYP82C3	Cluster 1; R_up_day	Cluster 1; R_up_night	Metabolism.Cellular metabolism.Oxidation reduction.Cytochrome P450 oxidoreductase
VIT_03s0063g01810	No hit	Cluster 1; R_up_day	Cluster 1; R_up_night	No hit
VIT_03s0063g01920	Pentatricopeptide (PPR) repeat	Cluster 1; R_up_day	Cluster 1; R_up_night	Diverse functions.Gene family with diverse functions.Pentatricopeptide domain family
VIT_03s0063g02030	4-hydroxy-3-methylbut-2-enyl diphosphate reductase	Cluster 1; R_up_day	Cluster 1; R_up_night	Metabolism.Primary metabolism.Lipid metabolism.Steroid metabolism.Steroid biosynthesis	Metabolism.Secondary metabolism.Terpenoid metabolism.Terpenoid biosynthesis
VIT_03s0063g02170	No hit	Cluster 1; R_up_day	Cluster 1; R_up_night	No hit
VIT_03s0063g02310	Acidic leucine-rich nuclear phosphoprotein 32 member B	Cluster 1; R_up_day	Cluster 1; R_up_night	Unknown
VIT_03s0063g02390	No hit	Cluster 1; R_up_day	Cluster 1; R_up_night	No hit
VIT_03s0063g02430	Major Facilitator Superfamily	Cluster 1; R_up_day	Cluster 1; R_up_night	Transport overview.Electrochemical Potential-driven Transporters.Porters.Major Facilitator Superfamily
VIT_03s0088g00040	Concanavalin A lectin	Cluster 1; R_up_day	Cluster 1; R_up_night	Unknown
VIT_03s0088g00180	No hit	Cluster 1; R_up_day	Cluster 1; R_up_night	No hit
VIT_03s0088g00190	Brassinosteroid insensitive 1-associated receptor kinase 1	Cluster 1; R_up_day	Cluster 1; R_up_night	Signaling.Hormone Signaling.Brassinosteroid Signaling.Brassinosteroid-mediated Signaling pathway
VIT_03s0088g00690	Pathogenesis-related protein 1 precursor (PRP 1)	Cluster 1; R_up_day	Cluster 1; R_up_night	Signaling.Hormone Signaling.Jasmonate salicylate signaling.Jasmonate Signaling.Jasmonate-mediated Signaling pathway	Response to stimulus.Stress response.Biotic stress response.Plant-pathogen interaction	Signaling.Hormone Signaling.Jasmonate salicylate signaling.Salicylic acid Signaling.Salicylic acid-responsive
VIT_03s0088g00700	Pathogenesis related protein 1 precursor (pr1 gene)	Cluster 1; R_up_day	Cluster 1; R_up_night	Signaling.Hormone Signaling.Jasmonate salicylate signaling.Jasmonate Signaling.Jasmonate-mediated Signaling pathway	Response to stimulus.Stress response.Biotic stress response.Plant-pathogen interaction	Signaling.Hormone Signaling.Jasmonate salicylate signaling.Salicylic acid Signaling.Salicylic acid-responsive
VIT_03s0088g00710	Pathogenesis-related protein 1 precursor (PRP 1)	Cluster 1; R_up_day	Cluster 1; R_up_night	Signaling.Hormone Signaling.Jasmonate salicylate signaling.Jasmonate Signaling.Jasmonate-mediated Signaling pathway	Response to stimulus.Stress response.Biotic stress response.Plant-pathogen interaction	Signaling.Hormone Signaling.Jasmonate salicylate signaling.Salicylic acid Signaling.Salicylic acid-responsive
VIT_03s0088g00750	Pathogenesis related protein 1 precursor [Vitis vinifera]	Cluster 1; R_up_day	Cluster 1; R_up_night	Signaling.Hormone Signaling.Jasmonate salicylate signaling.Jasmonate Signaling.Jasmonate-mediated Signaling pathway	Response to stimulus.Stress response.Biotic stress response.Plant-pathogen interaction	Signaling.Hormone Signaling.Jasmonate salicylate signaling.Salicylic acid Signaling.Salicylic acid-responsive
VIT_03s0088g00970	No hit	Cluster 1; R_up_day	Cluster 1; R_up_night	No hit
VIT_03s0088g01090	Zinc finger (C3HC4-type ring finger)	Cluster 1; R_up_day	Cluster 1; R_up_night	Regulation overview.Regulation of gene expression.Regulation of transcription.Transcription factor.Zinc finger C3HC4 family transcription factor
VIT_03s0088g01180	Proline iminopeptidase	Cluster 1; R_up_day	Cluster 1; R_up_night	Metabolism.Primary metabolism.Amino acid metabolism.Arginine and proline metabolism	Metabolism.Primary metabolism.Protein metabolism and modification.Proteolysis
VIT_03s0088g01280	No hit	Cluster 1; R_up_day	Cluster 1; R_up_night	No hit
VIT_03s0088g01300	No hit	Cluster 1; R_up_day	Cluster 1; R_up_night	No hit
VIT_03s0091g00070	ACT domain-containing protein (ACR6)	Cluster 1; R_up_day	Cluster 1; R_up_night	Unknown
VIT_03s0091g00090	No hit	Cluster 1; R_up_day	Cluster 1; R_up_night	No hit
VIT_03s0091g00140	Plant basic secretory protein (BSP) family	Cluster 1; R_up_day	Cluster 1; R_up_night	Unknown
VIT_03s0091g00150	NtPRp27 secretory protein	Cluster 1; R_up_day	Cluster 1; R_up_night	Response to stimulus.Stress response.Biotic stress response
VIT_03s0091g00160	NtPRp27 secretory protein	Cluster 1; R_up_day	Cluster 1; R_up_night	Response to stimulus.Stress response.Biotic stress response
VIT_03s0091g00190	WD40	Cluster 1; R_up_day	Cluster 1; R_up_night	Unknown
VIT_03s0091g00200	DNA repair protein REV1	Cluster 1; R_up_day	Cluster 1; R_up_night	Metabolism.Primary metabolism.Nucleobase, nucleoside, nucleotide, nucleic acid metabolism.Nucleic acid metabolism.DNA metabolism.DNA replication	Metabolism.Primary metabolism.Nucleobase, nucleoside, nucleotide, nucleic acid metabolism.Nucleic acid metabolism.DNA metabolism.DNA recombination and repair.repair
VIT_03s0091g00260	Zinc finger protein 4	Cluster 1; R_up_day	Cluster 1; R_up_night	Regulation overview.Regulation of gene expression.Regulation of transcription.Transcription factor.C2H2 family transcription factor
VIT_03s0091g00480	Zinc finger (C3HC4-type ring finger)	Cluster 1; R_up_day	Cluster 1; R_up_night	Regulation overview.Regulation of gene expression.Regulation of transcription.Transcription factor.Zinc finger C3HC4 family transcription factor
VIT_03s0091g00520	Prolyl 4-hydroxylase	Cluster 1; R_up_day	Cluster 1; R_up_night	Metabolism.Primary metabolism.Amino acid metabolism.Arginine and proline metabolism	Metabolism.Secondary metabolism.Phenylpropanoid metabolism.Flavonoid metabolism.Flavonoid biosynthesis	Metabolism.Primary metabolism.Protein metabolism and modification.Protein modification.Prolyl hydroxylation
VIT_03s0091g00540	Prolyl 4-hydroxylase	Cluster 1; R_up_day	Cluster 1; R_up_night	Metabolism.Primary metabolism.Amino acid metabolism.Arginine and proline metabolism	Metabolism.Secondary metabolism.Phenylpropanoid metabolism.Flavonoid metabolism.Flavonoid biosynthesis	Metabolism.Primary metabolism.Protein metabolism and modification.Protein modification.Prolyl hydroxylation
VIT_03s0091g00580	Protein Mpv17	Cluster 1; R_up_day	Cluster 1; R_up_night	Cellular process.Cellular component organization and biogenesis.Organelle organization and biogenesis.Peroxisome organization and biogenesis.Peroxisome membrane organization and biogenesis
VIT_03s0091g00670	Lateral organ boundaries protein 38	Cluster 1; R_up_day	Cluster 1; R_up_night	Regulation overview.Regulation of gene expression.Regulation of transcription.Transcription factor.AS2 family transcription factor
VIT_03s0091g00820	Radical SAM domain-containing protein	Cluster 1; R_up_day	Cluster 1; R_up_night	Unclear
VIT_03s0091g00930	GRAM domain-containing protein / ABA-responsive	Cluster 1; R_up_day	Cluster 1; R_up_night	Unknown
VIT_03s0091g01170	Meprin and TRAF homology domain-containing protein	Cluster 1; R_up_day	Cluster 1; R_up_night	Unclear
VIT_03s0091g01180	No hit	Cluster 1; R_up_day	Cluster 1; R_up_night	No hit
VIT_03s0091g01260	No hit	Cluster 1; R_up_day	Cluster 1; R_up_night	No hit
VIT_03s0097g00060	Arginine-tRNA-protein transferase 1	Cluster 1; R_up_day	Cluster 1; R_up_night	Metabolism.Primary metabolism.Nucleobase, nucleoside, nucleotide, nucleic acid metabolism.Nucleic acid metabolism.RNA metabolism.tRNA metabolism.tRNA processing	Metabolism.Primary metabolism.Protein metabolism and modification.Protein synthesis.Translation.Amino acid activation
VIT_03s0097g00220		Cluster 1; R_up_day	Cluster 1; R_up_night	Metabolism.Primary metabolism.Carbohydrate metabolism.Monosaccharide metabolism.Fructose and mannose metabolism
VIT_03s0097g00410	No hit	Cluster 1; R_up_day	Cluster 1; R_up_night	No hit
VIT_03s0097g00580	No hit	Cluster 1; R_up_day	Cluster 1; R_up_night	No hit
VIT_03s0097g00680	Zinc finger (C3HC4-type ring finger)	Cluster 1; R_up_day	Cluster 1; R_up_night	Regulation overview.Regulation of gene expression.Regulation of transcription.Transcription factor.Zinc finger C3HC4 family transcription factor
VIT_03s0097g00700	Pathogenesis-related protein 1 precursor (PRP 1)	Cluster 1; R_up_day	Cluster 1; R_up_night	Signaling.Hormone Signaling.Jasmonate salicylate signaling.Jasmonate Signaling.Jasmonate-mediated Signaling pathway	Response to stimulus.Stress response.Biotic stress response.Plant-pathogen interaction	Signaling.Hormone Signaling.Jasmonate salicylate signaling.Salicylic acid Signaling.Salicylic acid-responsive
VIT_03s0110g00190	Cytochrome oxidase subunit 1	Cluster 1; R_up_day	Cluster 1; R_up_night	Metabolism.Primary metabolism.Generation of metabolite precursors and energy.Electron transport.Respiratory-chain phosphorylation	Transport overview.Primary Active Transporters.Oxidoreduction-driven transporters.Proton-translocating Cyt Oxidase
VIT_03s0110g00220	Ribosomal RNA assembly protein mis3	Cluster 1; R_up_day	Cluster 1; R_up_night	Unclassified
VIT_03s0110g00230	Seed maturation protein PM23	Cluster 1; R_up_day	Cluster 1; R_up_night	Response to stimulus.Stress response.Biotic stress response
VIT_03s0110g00270	No hit	Cluster 1; R_up_day	Cluster 1; R_up_night	No hit
VIT_03s0110g00330	Cinnamyl alcohol dehydrogenase	Cluster 1; R_up_day	Cluster 1; R_up_night	Metabolism.Secondary metabolism.Phenylpropanoid metabolism.Phenylpropanoid biosynthesis
VIT_03s0110g00340	Cinnamyl alcohol dehydrogenase	Cluster 1; R_up_day	Cluster 1; R_up_night	Metabolism.Secondary metabolism.Phenylpropanoid metabolism.Phenylpropanoid biosynthesis
VIT_03s0132g00010	Geranyl diphosphate synthase [Vitis vinifera]	Cluster 1; R_up_day	Cluster 1; R_up_night	Metabolism.Primary metabolism.Lipid metabolism.Steroid metabolism.Steroid biosynthesis	Metabolism.Secondary metabolism.Terpenoid metabolism.Terpenoid biosynthesis
VIT_03s0132g00060	Unknown protein	Cluster 1; R_up_day	Cluster 1; R_up_night	Unknown
VIT_03s0132g00140	Unknown	Cluster 1; R_up_day	Cluster 1; R_up_night	Unknown
VIT_03s0132g00330	No hit	Cluster 1; R_up_day	Cluster 1; R_up_night	No hit
VIT_03s0167g00040	Unknown	Cluster 1; R_up_day	Cluster 1; R_up_night	Unknown
VIT_03s0167g00050	Concanavalin A lectin	Cluster 1; R_up_day	Cluster 1; R_up_night	Unknown
VIT_03s0180g00080	Cyclase	Cluster 1; R_up_day	Cluster 1; R_up_night	Unclear
VIT_04s0008g00060	Proteasome 26S regulatory subunit S5A (RPN10)	Cluster 1; R_up_day	Cluster 1; R_up_night	Metabolism.Primary metabolism.Protein metabolism and modification.Proteolysis.cytoplasmic and nuclear protein degradation.Ubiquitin-mediated proteolysis.Proteasome
VIT_04s0008g00140	Chitinase [Vitis vinifera]	Cluster 1; R_up_day	Cluster 1; R_up_night	Metabolism.Primary metabolism.Carbohydrate metabolism.Monosaccharide metabolism.Amino sugar metabolism	Response to stimulus.Stress response
VIT_04s0008g00270	Elongation factor 1-alpha (EF-1-alpha)	Cluster 1; R_up_day	Cluster 1; R_up_night	Metabolism.Primary metabolism.Protein metabolism and modification.Protein synthesis.Translation.Translational elongation	Transport overview.Macromolecule transport.RNA transport
VIT_04s0008g00390	Clavata1 receptor kinase (CLV1)	Cluster 1; R_up_day	Cluster 1; R_up_night	Signaling.Signaling pathway.Protein kinase
VIT_04s0008g00410	Clavata1 receptor kinase (CLV1)	Cluster 1; R_up_day	Cluster 1; R_up_night	Signaling.Signaling pathway.Protein kinase
VIT_04s0008g00430	Clavata1 receptor kinase (CLV1)	Cluster 1; R_up_day	Cluster 1; R_up_night	Signaling.Signaling pathway.Protein kinase
VIT_04s0008g00470	Early nodulin Enod93 protein	Cluster 1; R_up_day	Cluster 1; R_up_night	Unknown
VIT_04s0008g00520	6-phosphofructokinase	Cluster 1; R_up_day	Cluster 1; R_up_night	Metabolism.Primary metabolism.Carbohydrate metabolism.Monosaccharide metabolism.Fructose and mannose metabolism	Metabolism.Primary metabolism.Carbohydrate metabolism.Glycolysis Gluconeogenesis
VIT_04s0008g00990	Translation initiation factor eIF-4A	Cluster 1; R_up_day	Cluster 1; R_up_night	Metabolism.Primary metabolism.Nucleobase, nucleoside, nucleotide, nucleic acid metabolism.Nucleic acid metabolism.RNA metabolism.RNA processing.mRNA processing.mRNA splicing	Metabolism.Primary metabolism.Protein metabolism and modification.Protein synthesis.Translation.Translational initiation	Transport overview.Macromolecule transport.RNA transport
VIT_04s0008g01060	Substrate carrier	Cluster 1; R_up_day	Cluster 1; R_up_night	Transport overview.Electrochemical Potential-driven Transporters.Porters.Mitochondrial Carrier	Transport overview.Mitochondrial membrane transport
VIT_04s0008g01130	Solute carrier family 25	Cluster 1; R_up_day	Cluster 1; R_up_night	Transport overview.Electrochemical Potential-driven Transporters.Porters.Mitochondrial Carrier.Mitochondrial ADP/ATP carrier	Transport overview.Mitochondrial membrane transport.Mitochondrial membrane ATP/ADP transport
VIT_04s0008g01500	Heat shock protein 17.6 kDa class II	Cluster 1; R_up_day	Cluster 1; R_up_night	Metabolism.Primary metabolism.Protein metabolism and modification.Protein folding.Chaperone-mediated protein folding.HSP-mediated protein folding	Metabolism.Primary metabolism.Protein metabolism and modification.Protein processing in endoplasmic reticulum
VIT_04s0008g01520	Heat shock protein 17.6 kDa class II	Cluster 1; R_up_day	Cluster 1; R_up_night	Metabolism.Primary metabolism.Protein metabolism and modification.Protein folding.Chaperone-mediated protein folding.HSP-mediated protein folding	Metabolism.Primary metabolism.Protein metabolism and modification.Protein processing in endoplasmic reticulum
VIT_04s0008g01630	No hit	Cluster 1; R_up_day	Cluster 1; R_up_night	No hit
VIT_04s0008g01780	Transposon protein	Cluster 1; R_up_day	Cluster 1; R_up_night	Transposable elements viral and plasmid proteins.Protein from transposable element
VIT_04s0008g02300	Pyruvate dehydrogenase E1 beta subunit	Cluster 1; R_up_day	Cluster 1; R_up_night	Metabolism.Primary metabolism.Carbohydrate metabolism.Glycolysis Gluconeogenesis	Metabolism.Primary metabolism.Amino acid metabolism.Alanine and aspartate metabolism	Metabolism.Primary metabolism.Amino acid metabolism.Valine, leucine, and isoleucine metabolism.Valine, leucine, and isoleucine biosynthesis	Metabolism.Primary metabolism.Carbohydrate metabolism.Monosaccharide metabolism.Pyruvate metabolism	Metabolism.Primary metabolism.Organic acid metabolism.Butanoate metabolism	Signaling.Hormone Signaling.Auxin Signaling.Auxin metabolism
VIT_04s0008g02600	fasciclin arabinogalactan-protein (FLA14)	Cluster 1; R_up_day	Cluster 1; R_up_night	Cellular process.Cellular component organization and biogenesis.Cell wall organization and biogenesis.Cell wall structural protein
VIT_04s0008g02980	Lupeol synthase	Cluster 1; R_up_day	Cluster 1; R_up_night	Metabolism.Primary metabolism.Lipid metabolism.Steroid metabolism.Steroid biosynthesis
VIT_04s0008g02990	Cycloartenol synthase	Cluster 1; R_up_day	Cluster 1; R_up_night	Metabolism.Primary metabolism.Lipid metabolism.Steroid metabolism.Steroid biosynthesis	Signaling.Hormone Signaling.Brassinosteroid Signaling.Brassinosteroid metabolism.Brassinosteroid biosynthesis
VIT_04s0008g03030	RNA recognition motif (RRM)-containing	Cluster 1; R_up_day	Cluster 1; R_up_night	Unknown
VIT_04s0008g03040	RNA recognition motif (RRM)-containing	Cluster 1; R_up_day	Cluster 1; R_up_night	Unknown
VIT_04s0008g03430	Exostosin family	Cluster 1; R_up_day	Cluster 1; R_up_night	Metabolism.Primary metabolism.Carbohydrate metabolism.Oligosaccharide metabolism.Glycan metabolism.Glycan structures-biosynthesis1
VIT_04s0008g03470	Myb domain protein 109	Cluster 1; R_up_day	Cluster 1; R_up_night	Regulation overview.Regulation of gene expression.Regulation of transcription.Transcription factor.MYB family transcription factor
VIT_04s0008g04790	ABC transporter g family pleiotropic drug resistance 12 PDR12	Cluster 1; R_up_day	Cluster 1; R_up_night	Transport overview.Macromolecule transport.Multidrug transport.Multidrug ABC transport
VIT_04s0008g04820	ABC transporter g family pleiotropic drug resistance 12 PDR12	Cluster 1; R_up_day	Cluster 1; R_up_night	Transport overview.Macromolecule transport.Multidrug transport.Multidrug ABC transport
VIT_04s0008g04830	ABC transporter g family pleiotropic drug resistance 12 PDR12	Cluster 1; R_up_day	Cluster 1; R_up_night	Transport overview.Macromolecule transport.Multidrug transport.Multidrug ABC transport
VIT_04s0008g04840	ABC transporter g family pleiotropic drug resistance 12 PDR12	Cluster 1; R_up_day	Cluster 1; R_up_night	Transport overview.Macromolecule transport.Multidrug transport.Multidrug ABC transport
VIT_04s0008g04900	WD-40 repeat protein (LEUNIG)	Cluster 1; R_up_day	Cluster 1; R_up_night	Development.Reproductive development.Flower development	Regulation overview.Regulation of gene expression.Regulation of transcription.Transcription factor.LUG family transcription factor	Regulation overview.Regulation of gene expression.Regulation of transcription.Transcriptional co-repression
VIT_04s0008g05200	No hit	Cluster 1; R_up_day	Cluster 1; R_up_night	No hit
VIT_04s0008g05350	Serine hydrolase [Vitis vinifera]	Cluster 1; R_up_day	Cluster 1; R_up_night	Metabolism.Primary metabolism.Amino acid metabolism.Glycine, serine, and threonine metabolism	Metabolism.Primary metabolism.Amino acid metabolism.Amino acid catabolism	Metabolism.Primary metabolism.Amino acid metabolism.Serine metabolism.Serine catabolism
VIT_04s0008g05390	Carboxyesterase17 CXE17	Cluster 1; R_up_day	Cluster 1; R_up_night	Metabolism.Cellular metabolism.Esterase activity
VIT_04s0008g05420	SPX2 (SYG1/Pho81/XPR1) domain-containing protein SPX2	Cluster 1; R_up_day	Cluster 1; R_up_night	Transport overview.Electrochemical Potential-driven Transporters.Porters.Phosphate Permease (Pho1)
VIT_04s0008g05610	Centromeric protein	Cluster 1; R_up_day	Cluster 1; R_up_night	Cellular process.Cell growth and death
VIT_04s0008g05700	ACT domain-containing protein	Cluster 1; R_up_day	Cluster 1; R_up_night	Unknown
VIT_04s0008g05820	Stromal cell-derived factor 2 protein precursor (SDF2 protein)	Cluster 1; R_up_day	Cluster 1; R_up_night	Unclear
VIT_04s0008g06000	Ethylene-responsive transcription factor ERF003	Cluster 1; R_up_day	Cluster 1; R_up_night	Signaling.Hormone Signaling.Ethylene Signaling.Ethylene-mediated Signaling pathway	Regulation overview.Regulation of gene expression.Regulation of transcription.Transcription factor.AP2 family transcription factor.ERF subfamily transcription factor
VIT_04s0008g06320	Unknown protein	Cluster 1; R_up_day	Cluster 1; R_up_night	Unknown
VIT_04s0008g06570	Chorismate mutase	Cluster 1; R_up_day	Cluster 1; R_up_night	Metabolism.Primary metabolism.Amino acid metabolism.Aromatic amino acid metabolism.Aromatic amino acid biosynthesis	Metabolism.Cellular metabolism.Shikimate metabolism	Metabolism.Primary metabolism.Amino acid metabolism.Amino acid biosynthesis
VIT_04s0008g06660	Unknown protein	Cluster 1; R_up_day	Cluster 1; R_up_night	Unknown
VIT_04s0008g06710	Zinc finger (C2H2 type) family	Cluster 1; R_up_day	Cluster 1; R_up_night	Regulation overview.Regulation of gene expression.Regulation of transcription.Transcription factor.C2H2 family transcription factor
VIT_04s0008g06930	Transposase	Cluster 1; R_up_day	Cluster 1; R_up_night	Transposable elements viral and plasmid proteins.Protein from transposable element
VIT_04s0008g06970	DnaJ-like zinc-finger protein	Cluster 1; R_up_day	Cluster 1; R_up_night	Transport overview.Primary Active Transporters.P-P-bond hydrolysis-driven transporters.General Secretory Pathway (Sec)
VIT_04s0008g07000	Zinc finger (CCCH-type) family protein	Cluster 1; R_up_day	Cluster 1; R_up_night	Regulation overview.Regulation of gene expression.Regulation of transcription.Transcription factor.C3H family transcription factor
VIT_04s0008g07060	Translation initiation factor eIF-3 subunit 9	Cluster 1; R_up_day	Cluster 1; R_up_night	Metabolism.Primary metabolism.Protein metabolism and modification.Protein synthesis.Translation.Translational initiation	Transport overview.Macromolecule transport.RNA transport
VIT_04s0023g00050	Sterol glucosyltransferase	Cluster 1; R_up_day	Cluster 1; R_up_night	Metabolism.Primary metabolism.Lipid metabolism.Steroid metabolism.Steroid biosynthesis
VIT_04s0023g00210	GRAM domain-containing protein / ABA-responsive	Cluster 1; R_up_day	Cluster 1; R_up_night	Unknown
VIT_04s0023g00270	CBS domain-containing protein	Cluster 1; R_up_day	Cluster 1; R_up_night	Unknown
VIT_04s0023g00340	No hit	Cluster 1; R_up_day	Cluster 1; R_up_night	No hit
VIT_04s0023g00430	Tyrosine specific protein phosphatase	Cluster 1; R_up_day	Cluster 1; R_up_night	Signaling.Signaling pathway.Protein phosphatase
VIT_04s0023g00440	Zinc finger (C2H2 type) family	Cluster 1; R_up_day	Cluster 1; R_up_night	Regulation overview.Regulation of gene expression.Regulation of transcription.Transcription factor.C2H2 family transcription factor
VIT_04s0023g00530	Auxin responsive SAUR protein	Cluster 1; R_up_day	Cluster 1; R_up_night	Signaling.Hormone Signaling.Auxin Signaling.Auxin-mediated Signaling pathway	Signaling.Hormone Signaling.Auxin Signaling.Auxin responsive
VIT_04s0023g00600	Isopentenyl diphosphate isomerase 2	Cluster 1; R_up_day	Cluster 1; R_up_night	Metabolism.Primary metabolism.Lipid metabolism.Steroid metabolism.Steroid biosynthesis	Metabolism.Secondary metabolism.Terpenoid metabolism.Terpenoid biosynthesis
VIT_04s0023g00630	No hit	Cluster 1; R_up_day	Cluster 1; R_up_night	No hit
VIT_04s0023g01080	Lys Motif-Type Receptor-Like Kinase LYK4	Cluster 1; R_up_day	Cluster 1; R_up_night	Signaling.Signaling pathway.Protein kinase
VIT_04s0023g01190	Transcription initiation factor TFIIE beta subunit	Cluster 1; R_up_day	Cluster 1; R_up_night	Metabolism.Primary metabolism.Nucleobase, nucleoside, nucleotide, nucleic acid metabolism.Nucleic acid metabolism.RNA metabolism.Basal transcription factors	Metabolism.Primary metabolism.Nucleobase, nucleoside, nucleotide, nucleic acid metabolism.Nucleic acid metabolism.RNA metabolism.RNA biosynthesis
VIT_04s0023g01440	SIN	Cluster 1; R_up_day	Cluster 1; R_up_night	Metabolism.Primary metabolism.Nucleobase, nucleoside, nucleotide, nucleic acid metabolism.Nucleic acid metabolism.RNA metabolism.RNA biosynthesis
VIT_04s0023g01530	Transcription initiation factor TFIIB	Cluster 1; R_up_day	Cluster 1; R_up_night	Metabolism.Primary metabolism.Nucleobase, nucleoside, nucleotide, nucleic acid metabolism.Nucleic acid metabolism.RNA metabolism.Basal transcription factors	Metabolism.Primary metabolism.Nucleobase, nucleoside, nucleotide, nucleic acid metabolism.Nucleic acid metabolism.RNA metabolism.RNA biosynthesis
VIT_04s0023g01980	Syntaxin 1B/2/3/4	Cluster 1; R_up_day	Cluster 1; R_up_night	Cellular process.Cellular transport.Protein trafficking.Vesicle-mediated trafficking.SNARE interactions in vesicular transport	Transport overview.Channels and pores.Vesicle Fusion Pores.Synaptosomal Vesicle Fusion Pore
VIT_04s0023g02080	Bifunctional dihydrofolate reductase-thymidylate synthase 1	Cluster 1; R_up_day	Cluster 1; R_up_night	Metabolism.Primary metabolism.Nucleobase, nucleoside, nucleotide, nucleic acid metabolism.Nucleotide metabolism.Pyrimidine metabolism	Metabolism.Cellular metabolism.One-carbon metabolism	Metabolism.Primary metabolism.Coenzyme and prosthetic group metabolism.Folate metabolism
VIT_04s0023g02110	Unknown protein	Cluster 1; R_up_day	Cluster 1; R_up_night	Unknown
VIT_04s0023g02150	Phosphatidic acid phosphatase / PAP2	Cluster 1; R_up_day	Cluster 1; R_up_night	Metabolism.Primary metabolism.Lipid metabolism.Glycerolipid metabolism.Glycerophospholipid metabolism	Metabolism.Primary metabolism.Lipid metabolism.Ether lipid metabolism	Metabolism.Primary metabolism.Lipid metabolism.Sphingolipid metabolism
VIT_04s0023g02480	Dehydrin 1b	Cluster 1; R_up_day	Cluster 1; R_up_night	Response to stimulus.Stress response.Abiotic stress response.Desiccation stress response
VIT_04s0023g02680	Dimethyladenosine transferase	Cluster 1; R_up_day	Cluster 1; R_up_night	Metabolism.Primary metabolism.Nucleobase, nucleoside, nucleotide, nucleic acid metabolism.Nucleic acid metabolism.RNA metabolism.rRNA metabolism
VIT_04s0023g02850	NC domain-containing protein	Cluster 1; R_up_day	Cluster 1; R_up_night	Unknown
VIT_04s0023g02860	MRNA cap guanine-N7 methyltransferase 1	Cluster 1; R_up_day	Cluster 1; R_up_night	Metabolism.Primary metabolism.Amino acid metabolism.Methionine metabolism	Metabolism.Primary metabolism.Nucleobase, nucleoside, nucleotide, nucleic acid metabolism.Nucleic acid metabolism.RNA metabolism.RNA biosynthesis.mRNA biosynthesis.mRNA capping	Metabolism.Primary metabolism.Nucleobase, nucleoside, nucleotide, nucleic acid metabolism.Nucleic acid metabolism.RNA metabolism.RNA catabolism.RNA surveillance
VIT_04s0023g02910	No hit	Cluster 1; R_up_day	Cluster 1; R_up_night	No hit
VIT_04s0023g03020	Serine carboxypeptidase S28	Cluster 1; R_up_day	Cluster 1; R_up_night	Metabolism.Primary metabolism.Protein metabolism and modification.Proteolysis.Peptidase-mediated proteolysis
VIT_04s0023g03230	Auxin-responsive SAUR9	Cluster 1; R_up_day	Cluster 1; R_up_night	Signaling.Hormone Signaling.Auxin Signaling.Auxin-mediated Signaling pathway	Signaling.Hormone Signaling.Auxin Signaling.Auxin responsive
VIT_04s0023g03270	Anthranilate phosphoribosyltransferase	Cluster 1; R_up_day	Cluster 1; R_up_night	Metabolism.Primary metabolism.Amino acid metabolism.Aromatic amino acid metabolism.Aromatic amino acid biosynthesis	Metabolism.Primary metabolism.Amino acid metabolism.Amino acid biosynthesis	Metabolism.Primary metabolism.Amino acid metabolism.Aromatic amino acid metabolism.Tryptophan metabolism.Tryptophan biosynthesis
VIT_04s0023g03540	Thaumatin SCUTL1	Cluster 1; R_up_day	Cluster 1; R_up_night	Response to stimulus.Stress response
VIT_04s0023g03570	Oligopeptide transporter 7 ATOPT7	Cluster 1; R_up_day	Cluster 1; R_up_night	Transport overview.Electrochemical Potential-driven Transporters.Porters.Oligopeptide Transporter	Transport overview.Macromolecule transport.Oligopeptide transport
VIT_04s0023g03640	Endoplasmatic reticulum retrieval protein 1B	Cluster 1; R_up_day	Cluster 1; R_up_night	Transport overview.Incompletely characterized transport systems.Putative transport protein.ER Retrieval Prot1 (Heavy Metal Tr)	Cellular process.Cellular transport.Protein trafficking.Vesicle-mediated trafficking
VIT_04s0023g03780	Cell cycle checkpoint protein RAD17 (AtRAD17)	Cluster 1; R_up_day	Cluster 1; R_up_night	Metabolism.Primary metabolism.Nucleobase, nucleoside, nucleotide, nucleic acid metabolism.Nucleic acid metabolism.DNA metabolism.DNA recombination and repair.repair
VIT_04s0023g03840	Beta-galactosidase	Cluster 1; R_up_day	Cluster 1; R_up_night	Metabolism.Primary metabolism.Carbohydrate metabolism.Monosaccharide metabolism.Galactose metabolism	Metabolism.Primary metabolism.Carbohydrate metabolism.Oligosaccharide metabolism.N-Glycan metabolism.N-Glycan catabolism	Metabolism.Primary metabolism.Lipid metabolism.Sphingolipid metabolism
VIT_04s0023g03890	Atfp6	Cluster 1; R_up_day	Cluster 1; R_up_night	Unclear
VIT_04s0023g03920	Zinc finger (FYVE type)	Cluster 1; R_up_day	Cluster 1; R_up_night	Regulation overview.Regulation of gene expression.Regulation of transcription.Transcription factor.Other zinc finger family transcription factor
VIT_04s0043g00090	Ca2+-ATPase 2 ACA2	Cluster 1; R_up_day	Cluster 1; R_up_night	Transport overview.Primary Active Transporters.P-P-bond hydrolysis-driven transporters.P-type ATPase (P-ATPase).Ca2+-ATPase (efflux)	Signaling.Signaling pathway.Calcium sensors and Signaling	Transport overview.Ion transport.Cation transport
VIT_04s0043g00180	Unknown protein	Cluster 1; R_up_day	Cluster 1; R_up_night	Unknown
VIT_04s0043g00260	No hit	Cluster 1; R_up_day	Cluster 1; R_up_night	No hit
VIT_04s0043g00500	Dynamin homolog	Cluster 1; R_up_day	Cluster 1; R_up_night	Cellular process.Cellular transport.Protein trafficking.Vesicle-mediated trafficking	Signaling.Signaling pathway.G-protein signaling pathway
VIT_04s0043g00510	Ethylene-responsive transcription factor ERF003	Cluster 1; R_up_day	Cluster 1; R_up_night	Signaling.Hormone Signaling.Ethylene Signaling.Ethylene-mediated Signaling pathway	Regulation overview.Regulation of gene expression.Regulation of transcription.Transcription factor.AP2 family transcription factor.ERF subfamily transcription factor
VIT_04s0043g00660	Aminoimidazolecarboximide ribonucleotide transformylase	Cluster 1; R_up_day	Cluster 1; R_up_night	Metabolism.Primary metabolism.Nucleobase, nucleoside, nucleotide, nucleic acid metabolism.Nucleotide metabolism.Purine metabolism	Metabolism.Secondary metabolism.Primary amino acids derivated metabolism.Alkaloid metabolism.Alkaloid biosynthesis.Alkaloid derived from histidine and purine biosynthesis
VIT_04s0043g00880	Tyrosine decarboxylase	Cluster 1; R_up_day	Cluster 1; R_up_night	Metabolism.Primary metabolism.Amino acid metabolism.Aromatic amino acid metabolism.Tyrosine metabolism.Tyrosine catabolism	Metabolism.Secondary metabolism.Primary amino acids derivated metabolism.Alkaloid metabolism.Alkaloid biosynthesis	Metabolism.Primary metabolism.Amino acid metabolism.Amino acid catabolism
VIT_04s0043g00960	Tetratricopeptide repeat (TPR)-containing	Cluster 1; R_up_day	Cluster 1; R_up_night	Unknown
VIT_04s0044g00180	Calmodulin-binding protein [Angelica dahurica]	Cluster 1; R_up_day	Cluster 1; R_up_night	Signaling.Signaling pathway.Calcium sensors and Signaling
VIT_04s0044g00220	Monooxygenase	Cluster 1; R_up_day	Cluster 1; R_up_night	Unclear
VIT_04s0044g00230	Monooxygenase (MO2)	Cluster 1; R_up_day	Cluster 1; R_up_night	Unclear
VIT_04s0044g00270	Monooxygenase (MO3)	Cluster 1; R_up_day	Cluster 1; R_up_night	Unclear
VIT_04s0044g01040	Basic helix-loop-helix (bHLH) family	Cluster 1; R_up_day	Cluster 1; R_up_night	Regulation overview.Regulation of gene expression.Regulation of transcription.Transcription factor.bHLH family transcription factor
VIT_04s0044g01230	Unknown	Cluster 1; R_up_day	Cluster 1; R_up_night	Unknown
VIT_04s0044g01300	DNA cross-link repair protein	Cluster 1; R_up_day	Cluster 1; R_up_night	Metabolism.Primary metabolism.Nucleobase, nucleoside, nucleotide, nucleic acid metabolism.Nucleic acid metabolism.DNA metabolism.DNA recombination and repair.repair
VIT_04s0044g01780	No hit	Cluster 1; R_up_day	Cluster 1; R_up_night	No hit
VIT_04s0044g01860	Auxin efflux carrier	Cluster 1; R_up_day	Cluster 1; R_up_night	Signaling.Hormone Signaling.Auxin Signaling.Auxin transport	Transport overview.Electrochemical Potential-driven Transporters.Porters.Auxin Efflux Carrier
VIT_04s0069g00120	Cullin 3a	Cluster 1; R_up_day	Cluster 1; R_up_night	Metabolism.Primary metabolism.Protein metabolism and modification.Proteolysis.cytoplasmic and nuclear protein degradation.Ubiquitin-mediated proteolysis
VIT_04s0069g00160	Transducin family protein / WD-40 repeat	Cluster 1; R_up_day	Cluster 1; R_up_night	Unclear
VIT_04s0069g00180	No hit	Cluster 1; R_up_day	Cluster 1; R_up_night	No hit
VIT_04s0069g00660	Unknown	Cluster 1; R_up_day	Cluster 1; R_up_night	Unknown
VIT_04s0069g00730	Glutamate receptor protein	Cluster 1; R_up_day	Cluster 1; R_up_night	Transport overview.Channels and pores.a-Type channels.Glutamate-gated Ion Channel of Neurotransmitter Receptors	Transport overview.Ion transport.Cation transport.Glutamate activated channel
VIT_04s0069g00790	Cyclic nucleotide-regulated ion channel (CNGC14)	Cluster 1; R_up_day	Cluster 1; R_up_night	Response to stimulus.Stress response.Biotic stress response.Plant-pathogen interaction	Transport overview.Channels and pores.a-Type channels.The Voltage-gated Ion Channel.Cyclic nucleotide-gated nonselective cation channel	Signaling.Signaling pathway.Calcium sensors and Signaling	Transport overview.Ion transport.Cation transport
VIT_04s0069g00980	WRKY DNA-binding protein 51	Cluster 1; R_up_day	Cluster 1; R_up_night	Regulation overview.Regulation of gene expression.Regulation of transcription.Transcription factor.WRKY family transcription factor
VIT_04s0069g01130	No hit	Cluster 1; R_up_day	Cluster 1; R_up_night	No hit
VIT_04s0069g01140	Unknown	Cluster 1; R_up_day	Cluster 1; R_up_night	Unknown
VIT_04s0079g00020	Cysteine-rich receptor-like protein kinase 2	Cluster 1; R_up_day	Cluster 1; R_up_night	Signaling.Signaling pathway.Protein kinase
VIT_04s0079g00510	No hit	Cluster 1; R_up_day	Cluster 1; R_up_night	No hit
VIT_04s0079g00540	No hit	Cluster 1; R_up_day	Cluster 1; R_up_night	No hit
VIT_04s0079g00690	Glutathione S-transferase 26 GSTF12	Cluster 1; R_up_day	Cluster 1; R_up_night	Metabolism.Primary metabolism.Coenzyme and prosthetic group metabolism.Peptide derived compounds biosynthesis.Glutathione metabolism	Response to stimulus.Stress response.Abiotic stress response.Oxidative stress response
VIT_04s0079g00720	No hit	Cluster 1; R_up_day	Cluster 1; R_up_night	No hit
VIT_04s0079g00790	Acyl-CoA synthetases (Acyl-activating enzyme 11)	Cluster 1; R_up_day	Cluster 1; R_up_night	Metabolism.Primary metabolism.Lipid metabolism.Fatty acid metabolism	Transport overview.Group translocators.Acyl CoA ligase-coupled transporters.Proposed Fatty Acid Transporter
VIT_04s0079g00810	Cold induced protein	Cluster 1; R_up_day	Cluster 1; R_up_night	Response to stimulus.Stress response.Abiotic stress response.Temperature stress response.Cold stress response
VIT_04s0210g00040	Strictosidine synthase	Cluster 1; R_up_day	Cluster 1; R_up_night	Metabolism.Secondary metabolism.Terpenoid metabolism.Terpenoid biosynthesis	Metabolism.Secondary metabolism.Terpenoid metabolism.Monoterpenoid metabolism.Monoterpenoid biosynthesis	Metabolism.Secondary metabolism.Primary amino acids derivated metabolism.Alkaloid metabolism.Alkaloid biosynthesis.Monoterpenoid indole alkaloid metabolism.Monoterpenoid indole alkaloid biosynthesis
VIT_04s0210g00080	Strictosidine synthase	Cluster 1; R_up_day	Cluster 1; R_up_night	Metabolism.Secondary metabolism.Terpenoid metabolism.Terpenoid biosynthesis	Metabolism.Secondary metabolism.Terpenoid metabolism.Monoterpenoid metabolism.Monoterpenoid biosynthesis	Metabolism.Secondary metabolism.Primary amino acids derivated metabolism.Alkaloid metabolism.Alkaloid biosynthesis.Monoterpenoid indole alkaloid metabolism.Monoterpenoid indole alkaloid biosynthesis
VIT_04s0210g00100	Mucin protein	Cluster 1; R_up_day	Cluster 1; R_up_night	Cellular process
VIT_04s0210g00130	Strictosidine synthase	Cluster 1; R_up_day	Cluster 1; R_up_night	Metabolism.Secondary metabolism.Terpenoid metabolism.Terpenoid biosynthesis	Metabolism.Secondary metabolism.Terpenoid metabolism.Monoterpenoid metabolism.Monoterpenoid biosynthesis	Metabolism.Secondary metabolism.Primary amino acids derivated metabolism.Alkaloid metabolism.Alkaloid biosynthesis.Monoterpenoid indole alkaloid metabolism.Monoterpenoid indole alkaloid biosynthesis
VIT_05s0020g00070	No hit	Cluster 1; R_up_day	Cluster 1; R_up_night	No hit
VIT_05s0020g00340	Unknown protein	Cluster 1; R_up_day	Cluster 1; R_up_night	Unknown
VIT_05s0020g00590	1-cys peroxiredoxin	Cluster 1; R_up_day	Cluster 1; R_up_night	Metabolism.Primary metabolism.Amino acid metabolism.Aromatic amino acid metabolism.Phenylalanine metabolism.Phenylalanine biosynthesis	Metabolism.Cellular metabolism.Methane metabolism	Response to stimulus.Stress response.Abiotic stress response.Oxidative stress response
VIT_05s0020g01040	Unknown protein	Cluster 1; R_up_day	Cluster 1; R_up_night	Unknown
VIT_05s0020g01050	No hit	Cluster 1; R_up_day	Cluster 1; R_up_night	No hit
VIT_05s0020g01370	Unknown	Cluster 1; R_up_day	Cluster 1; R_up_night	Unknown
VIT_05s0020g01430	Vesicle-associated membrane protein 72	Cluster 1; R_up_day	Cluster 1; R_up_night	Cellular process.Cellular transport.Protein trafficking.Vesicle-mediated trafficking.SNARE interactions in vesicular transport	Transport overview.Channels and pores.Vesicle Fusion Pores.Synaptosomal Vesicle Fusion Pore
VIT_05s0020g01730	Anaphase-promoting complex component APC7	Cluster 1; R_up_day	Cluster 1; R_up_night	Metabolism.Primary metabolism.Protein metabolism and modification.Proteolysis.cytoplasmic and nuclear protein degradation.Ubiquitin-mediated proteolysis	Cellular process.Cell growth and death
VIT_05s0020g01950	Unknown	Cluster 1; R_up_day	Cluster 1; R_up_night	Unknown
VIT_05s0020g02290	Endonuclease	Cluster 1; R_up_day	Cluster 1; R_up_night	Metabolism.Primary metabolism.Nucleobase, nucleoside, nucleotide, nucleic acid metabolism.Nucleic acid metabolism.DNA metabolism.DNA recombination and repair.repair
VIT_05s0020g02340	Methionine sulfoxide reductase	Cluster 1; R_up_day	Cluster 1; R_up_night	Metabolism.Primary metabolism.Amino acid metabolism.Methionine metabolism	Response to stimulus.Stress response.Abiotic stress response.Oxidative stress response
VIT_05s0020g03050	Unknown	Cluster 1; R_up_day	Cluster 1; R_up_night	Unknown
VIT_05s0020g03140	Sugar transporter 13	Cluster 1; R_up_day	Cluster 1; R_up_night	Transport overview.Electrochemical Potential-driven Transporters.Porters.Major Facilitator Superfamily.Sugar Porter	Transport overview.Macromolecule transport.Carbohydrate transport.Sugar transport
VIT_05s0020g03260	Copper amine oxidase	Cluster 1; R_up_day	Cluster 1; R_up_night	Metabolism.Primary metabolism.Amino acid metabolism.Arginine and proline metabolism.Urea cycle	Metabolism.Primary metabolism.Amino acid metabolism.Histidine metabolism	Metabolism.Primary metabolism.Amino acid metabolism.Aromatic amino acid metabolism.Tyrosine metabolism	Metabolism.Primary metabolism.Amino acid metabolism.Aromatic amino acid metabolism.Phenylalanine metabolism.Phenylalanine biosynthesis	Metabolism.Primary metabolism.Amino acid metabolism.Beta-Alanine metabolism	Signaling.Hormone Signaling.Auxin Signaling.Auxin metabolism	Metabolism.Cellular metabolism.Nitrogen and sulfur metabolism.Nitrogen metabolism.Amine metabolism
VIT_05s0020g03280	Copper amine oxidase	Cluster 1; R_up_day	Cluster 1; R_up_night	Metabolism.Primary metabolism.Amino acid metabolism.Arginine and proline metabolism.Urea cycle	Metabolism.Primary metabolism.Amino acid metabolism.Histidine metabolism	Metabolism.Primary metabolism.Amino acid metabolism.Aromatic amino acid metabolism.Tyrosine metabolism	Metabolism.Primary metabolism.Amino acid metabolism.Aromatic amino acid metabolism.Phenylalanine metabolism.Phenylalanine biosynthesis	Signaling.Hormone Signaling.Auxin Signaling.Auxin metabolism	Metabolism.Cellular metabolism.Nitrogen and sulfur metabolism.Nitrogen metabolism.Amine metabolism
VIT_05s0020g03290	S-receptor kinase	Cluster 1; R_up_day	Cluster 1; R_up_night	Signaling.Signaling pathway.Protein kinase
VIT_05s0020g03300	S-receptor kinase	Cluster 1; R_up_day	Cluster 1; R_up_night	Signaling.Signaling pathway.Protein kinase
VIT_05s0020g03480	Ribosomal protein L18P/L5E	Cluster 1; R_up_day	Cluster 1; R_up_night	Metabolism.Primary metabolism.Protein metabolism and modification.Protein synthesis.Ribosome
VIT_05s0020g03560	No hit	Cluster 1; R_up_day	Cluster 1; R_up_night	No hit
VIT_05s0020g03610	Unknown protein	Cluster 1; R_up_day	Cluster 1; R_up_night	Unknown
VIT_05s0020g03680	GCN5 N-acetyltransferase (GNAT)	Cluster 1; R_up_day	Cluster 1; R_up_night	Regulation overview.Regulation of gene expression.Regulation of transcription.Transcription factor.GNAT
VIT_05s0020g04140	Unknown protein	Cluster 1; R_up_day	Cluster 1; R_up_night	Unknown
VIT_05s0020g04270	Ca2+-ATPase 13 ACA13	Cluster 1; R_up_day	Cluster 1; R_up_night	Signaling.Signaling pathway.Calcium sensors and Signaling	Transport overview.Primary Active Transporters.P-P-bond hydrolysis-driven transporters.P-type ATPase (P-ATPase).Ca2+-ATPase (efflux)
VIT_05s0020g04280	Ca2+-ATPase 13 ACA13	Cluster 1; R_up_day	Cluster 1; R_up_night	Signaling.Signaling pathway.Calcium sensors and Signaling	Transport overview.Primary Active Transporters.P-P-bond hydrolysis-driven transporters.P-type ATPase (P-ATPase).Ca2+-ATPase (efflux)
VIT_05s0020g04300	Ca2+-ATPase 13 ACA13	Cluster 1; R_up_day	Cluster 1; R_up_night	Signaling.Signaling pathway.Calcium sensors and Signaling	Transport overview.Primary Active Transporters.P-P-bond hydrolysis-driven transporters.P-type ATPase (P-ATPase).Ca2+-ATPase (efflux)
VIT_05s0020g04320	Pentatricopeptide repeat-containing protein	Cluster 1; R_up_day	Cluster 1; R_up_night	Diverse functions.Gene family with diverse functions.Pentatricopeptide domain family
VIT_05s0020g04360	Ca2+-ATPase 13 ACA13	Cluster 1; R_up_day	Cluster 1; R_up_night	Signaling.Signaling pathway.Calcium sensors and Signaling	Transport overview.Primary Active Transporters.P-P-bond hydrolysis-driven transporters.P-type ATPase (P-ATPase).Ca2+-ATPase (efflux)
VIT_05s0020g04450	G-protein gamma subunit 1 (AGG1)	Cluster 1; R_up_day	Cluster 1; R_up_night	Signaling.Signaling pathway.G-protein signaling pathway
VIT_05s0020g04570	CBL-interacting protein kinase 7 (CIPK7)	Cluster 1; R_up_day	Cluster 1; R_up_night	Signaling.Signaling pathway.Protein kinase
VIT_05s0020g04640	Unknown protein	Cluster 1; R_up_day	Cluster 1; R_up_night	Unknown
VIT_05s0020g04650	ER degradation enhancer	Cluster 1; R_up_day	Cluster 1; R_up_night	Metabolism.Primary metabolism.Carbohydrate metabolism.Carbohydrate catabolism	Metabolism.Primary metabolism.Protein metabolism and modification.Protein processing in endoplasmic reticulum
VIT_05s0020g04670	No hit	Cluster 1; R_up_day	Cluster 1; R_up_night	No hit
VIT_05s0020g04680	Auxin-induced protein 22D	Cluster 1; R_up_day	Cluster 1; R_up_night	Signaling.Hormone Signaling.Auxin Signaling.Auxin-mediated Signaling pathway	Regulation overview.Regulation of gene expression.Regulation of transcription.Transcription factor.AUXIAA family transcription factor
VIT_05s0020g04890	Nucleic acid binding	Cluster 1; R_up_day	Cluster 1; R_up_night	Unknown
VIT_05s0020g05020	Inhibitor of trypsin and hageman factor (CMTI-V)	Cluster 1; R_up_day	Cluster 1; R_up_night	Metabolism.Primary metabolism.Protein metabolism and modification.Proteolysis
VIT_05s0020g05040	Proteinase inhibitor 1 PPI3B2	Cluster 1; R_up_day	Cluster 1; R_up_night	Metabolism.Primary metabolism.Protein metabolism and modification.Proteolysis.Protease inhibition
VIT_05s0029g00140	Ethylene-responsive transcription factor ERF062	Cluster 1; R_up_day	Cluster 1; R_up_night	Signaling.Hormone Signaling.Ethylene Signaling.Ethylene-mediated Signaling pathway	Regulation overview.Regulation of gene expression.Regulation of transcription.Transcription factor.AP2 family transcription factor.DREB subfamily transcription factor
VIT_05s0029g00230	Metal transporter Nramp2	Cluster 1; R_up_day	Cluster 1; R_up_night	Transport overview.Electrochemical Potential-driven Transporters.Porters.Metal Ion (Mn2+-iron) Transporter (Nramp)	Transport overview.Ion transport.Cation transport.Heavy metal ion transport
VIT_05s0029g00250	No hit	Cluster 1; R_up_day	Cluster 1; R_up_night	No hit
VIT_05s0029g00320	Unknown	Cluster 1; R_up_day	Cluster 1; R_up_night	Unknown
VIT_05s0029g00340	Heat shock transcription factor A5	Cluster 1; R_up_day	Cluster 1; R_up_night	Metabolism.Primary metabolism.Protein metabolism and modification.Protein folding.Chaperone-mediated protein folding.HSP-mediated protein folding	Regulation overview.Regulation of gene expression.Regulation of transcription.Transcription factor.HSF family transcription factor	Response to stimulus.Stress response.Abiotic stress response.Temperature stress response
VIT_05s0029g00380	No hit	Cluster 1; R_up_day	Cluster 1; R_up_night	No hit
VIT_05s0029g00470	Unknown protein	Cluster 1; R_up_day	Cluster 1; R_up_night	Unknown
VIT_05s0029g00860	Unknown protein	Cluster 1; R_up_day	Cluster 1; R_up_night	Unknown
VIT_05s0029g01050	No hit	Cluster 1; R_up_day	Cluster 1; R_up_night	No hit
VIT_05s0029g01160	Elongation factor 1-alpha 1	Cluster 1; R_up_day	Cluster 1; R_up_night	Metabolism.Primary metabolism.Protein metabolism and modification.Protein synthesis.Translation.Translational elongation	Transport overview.Macromolecule transport.RNA transport
VIT_05s0029g01220	Unknown protein	Cluster 1; R_up_day	Cluster 1; R_up_night	Unknown
VIT_05s0029g01340	Auxin-independent growth promoter (axi 1)	Cluster 1; R_up_day	Cluster 1; R_up_night	Signaling.Hormone Signaling.Auxin Signaling.Auxin-mediated Signaling pathway
VIT_05s0029g01470	Protein kinase Xa21	Cluster 1; R_up_day	Cluster 1; R_up_night	Signaling.Signaling pathway.Protein kinase
VIT_05s0029g01510	No hit	Cluster 1; R_up_day	Cluster 1; R_up_night	No hit
VIT_05s0029g01520	Seven in absentia SINA4	Cluster 1; R_up_day	Cluster 1; R_up_night	Metabolism.Primary metabolism.Protein metabolism and modification.Proteolysis.cytoplasmic and nuclear protein degradation.Ubiquitin-mediated proteolysis
VIT_05s0029g01530	No hit	Cluster 1; R_up_day	Cluster 1; R_up_night	No hit
VIT_05s0049g00010	Cellulose synthase CSLG2	Cluster 1; R_up_day	Cluster 1; R_up_night	Cellular process.Cellular component organization and biogenesis.Cell wall organization and biogenesis.Cell wall metabolism.Cell wall biosynthesis.Cellulose biosynthesis
VIT_05s0049g00030	Nodulin	Cluster 1; R_up_day	Cluster 1; R_up_night	Response to stimulus.Stress response.Biotic stress response
VIT_05s0049g00070	PhSUP1 SUPERMAN	Cluster 1; R_up_day	Cluster 1; R_up_night	Development.Reproductive development.Flower development	Regulation overview.Regulation of gene expression.Regulation of transcription.Transcription factor.C2H2 family transcription factor
VIT_05s0049g00110	Thioredoxin reductase	Cluster 1; R_up_day	Cluster 1; R_up_night	Metabolism.Primary metabolism.Nucleobase, nucleoside, nucleotide, nucleic acid metabolism.Nucleotide metabolism.Pyrimidine metabolism	Response to stimulus.Stress response.Abiotic stress response.Oxidative stress response
VIT_05s0049g00130	forkhead-associated domain-containing protein	Cluster 1; R_up_day	Cluster 1; R_up_night	Regulation overview.Regulation of gene expression.Regulation of transcription.Transcription factor.FHA family transcription factor
VIT_05s0049g00160	IBR10 (indole-3-butyric acid response 10); catalytic/ dodecenoyl-CoA delta-isomerase [Arabidopsis thaliana]	Cluster 1; R_up_day	Cluster 1; R_up_night	Metabolism.Secondary metabolism.Iba metabolism
VIT_05s0049g00510	Ethylene response factor ERF1	Cluster 1; R_up_day	Cluster 1; R_up_night	Signaling.Hormone Signaling.Ethylene Signaling.Ethylene-mediated Signaling pathway	Signaling.Hormone Signaling.Jasmonate salicylate signaling.Jasmonate Signaling.Jasmonate-mediated Signaling pathway	Regulation overview.Regulation of gene expression.Regulation of transcription.Transcription factor.AP2 family transcription factor
VIT_05s0049g00520	No hit	Cluster 1; R_up_day	Cluster 1; R_up_night	No hit
VIT_05s0049g00530	No hit	Cluster 1; R_up_day	Cluster 1; R_up_night	No hit
VIT_05s0049g00690	No hit	Cluster 1; R_up_day	Cluster 1; R_up_night	No hit
VIT_05s0049g00740	No hit	Cluster 1; R_up_day	Cluster 1; R_up_night	No hit
VIT_05s0049g00750	No hit	Cluster 1; R_up_day	Cluster 1; R_up_night	No hit
VIT_05s0049g00790	No hit	Cluster 1; R_up_day	Cluster 1; R_up_night	No hit
VIT_05s0049g00910	No hit	Cluster 1; R_up_day	Cluster 1; R_up_night	No hit
VIT_05s0049g00920	Inorganic phosphate transporter 1-4	Cluster 1; R_up_day	Cluster 1; R_up_night	Transport overview.Electrochemical Potential-driven Transporters.Porters.Major Facilitator Superfamily.Phosphate: H+ Symporter	Transport overview.Ion transport.Anion transport.Phosphate transport
VIT_05s0049g01010	Myb domain protein 14	Cluster 1; R_up_day	Cluster 1; R_up_night	Regulation overview.Regulation of gene expression.Regulation of transcription.Transcription factor.MYB family transcription factor
VIT_05s0049g01170	Unknown protein	Cluster 1; R_up_day	Cluster 1; R_up_night	Unknown
VIT_05s0049g01200	S-locus lectin protein kinase	Cluster 1; R_up_day	Cluster 1; R_up_night	Signaling.Signaling pathway.Protein kinase
VIT_05s0049g01360	HrBP1-1 PAP/fibrillin family	Cluster 1; R_up_day	Cluster 1; R_up_night	Cellular process
VIT_05s0049g01710	Transducin family protein / WD-40 repeat	Cluster 1; R_up_day	Cluster 1; R_up_night	Unclear
VIT_05s0049g02270	Ribosomal protein S3	Cluster 1; R_up_day	Cluster 1; R_up_night	Metabolism.Primary metabolism.Protein metabolism and modification.Protein synthesis.Ribosome
VIT_05s0049g02280	Ribosomal protein S3 40S	Cluster 1; R_up_day	Cluster 1; R_up_night	Metabolism.Primary metabolism.Protein metabolism and modification.Protein synthesis.Ribosome
VIT_05s0049g02320	HAD superfamily hydrolase	Cluster 1; R_up_day	Cluster 1; R_up_night	Unclassified
VIT_05s0051g00190	TIR-NBS-LRR-TIR disease resistance protein	Cluster 1; R_up_day	Cluster 1; R_up_night	Diverse functions.Gene family with diverse functions.NBS-LRR superfamily	Response to stimulus.Stress response.Biotic stress response
VIT_05s0051g00230	R protein L6	Cluster 1; R_up_day	Cluster 1; R_up_night	Response to stimulus.Stress response.Biotic stress response.Plant-pathogen interaction.R proteins from Plant-pathogen interaction
VIT_05s0051g00290	R protein L6	Cluster 1; R_up_day	Cluster 1; R_up_night	Response to stimulus.Stress response.Biotic stress response.Plant-pathogen interaction.R proteins from Plant-pathogen interaction
VIT_05s0051g00390	Disease resistance-responsive	Cluster 1; R_up_day	Cluster 1; R_up_night	Diverse functions.Gene family with diverse functions.NBS-LRR superfamily	Response to stimulus.Stress response.Biotic stress response
VIT_05s0051g00430	No hit	Cluster 1; R_up_day	Cluster 1; R_up_night	No hit
VIT_05s0051g00970	AAA-type ATPase family	Cluster 1; R_up_day	Cluster 1; R_up_night	Diverse functions.Gene family with diverse functions.AAA-type ATPase domain family
VIT_05s0062g00370	No hit	Cluster 1; R_up_day	Cluster 1; R_up_night	No hit
VIT_05s0062g00470	UDP-glucose:flavonoid 7-O-glucosyltransferase	Cluster 1; R_up_day	Cluster 1; R_up_night	Metabolism.Secondary metabolism.Phenylpropanoid metabolism.Flavonoid metabolism.Flavonoid biosynthesis.Flavonoid-glycoside biosynthesis
VIT_05s0062g00590	UDP-glucose:flavonoid 7-O-glucosyltransferase	Cluster 1; R_up_day	Cluster 1; R_up_night	Metabolism.Secondary metabolism.Phenylpropanoid metabolism.Flavonoid metabolism.Flavonoid biosynthesis.Flavonoid-glycoside biosynthesis
VIT_05s0062g00840	RAB GTPase ARA4	Cluster 1; R_up_day	Cluster 1; R_up_night	Cellular process.Cellular transport.Protein trafficking.Vesicle-mediated trafficking	Signaling.Signaling pathway.G-protein signaling pathway.RAB-GTPase regulation
VIT_05s0062g00950	Aldo/keto reductase AKR	Cluster 1; R_up_day	Cluster 1; R_up_night	Metabolism.Primary metabolism.Carbohydrate metabolism.Monosaccharide metabolism.Pentose glucuronate interconversion	Metabolism.Primary metabolism.Carbohydrate metabolism.Monosaccharide metabolism.Fructose and mannose metabolism	Metabolism.Primary metabolism.Carbohydrate metabolism.Monosaccharide metabolism.Galactose metabolism	Metabolism.Primary metabolism.Lipid metabolism.Glycerolipid metabolism	Metabolism.Primary metabolism.Carbohydrate metabolism.Monosaccharide metabolism.Pyruvate metabolism	Metabolism.Primary metabolism.Carbohydrate metabolism.Carbohydrate oxidation reduction
VIT_05s0062g01130	Aromatic and neutral transporter 1	Cluster 1; R_up_day	Cluster 1; R_up_night	Transport overview.Electrochemical Potential-driven Transporters.Porters.Amino Acid/Auxin Permease	Transport overview.Macromolecule transport.Amino acid transport
VIT_05s0062g01190	Pirin	Cluster 1; R_up_day	Cluster 1; R_up_night	Unknown
VIT_05s0062g01270	Cyclo-DOPA 5-O-glucosyltransferase	Cluster 1; R_up_day	Cluster 1; R_up_night	Metabolism.Primary metabolism.Amino acid metabolism.Aromatic amino acid metabolism.Tyrosine metabolism	Metabolism.Secondary metabolism.Aromatic compound metabolism
VIT_05s0062g01280	Cyclo-DOPA 5-O-glucosyltransferase	Cluster 1; R_up_day	Cluster 1; R_up_night	Metabolism.Primary metabolism.Amino acid metabolism.Aromatic amino acid metabolism.Tyrosine metabolism	Metabolism.Secondary metabolism.Aromatic compound metabolism
VIT_05s0062g01350	Unknown	Cluster 1; R_up_day	Cluster 1; R_up_night	Unknown
VIT_05s0077g00040	No hit	Cluster 1; R_up_day	Cluster 1; R_up_night	No hit
VIT_05s0077g00050	Peroxiredoxin	Cluster 1; R_up_day	Cluster 1; R_up_night	Response to stimulus.Stress response.Abiotic stress response.Oxidative stress response
VIT_05s0077g00260	Transducin protein	Cluster 1; R_up_day	Cluster 1; R_up_night	Unclear
VIT_05s0077g00270	SPX1 (SYG1/Pho81/XPR1) domain-containing protein SPX1	Cluster 1; R_up_day	Cluster 1; R_up_night	Transport overview.Electrochemical Potential-driven Transporters.Porters.Phosphate Permease (Pho1)
VIT_05s0077g00750	Basic helix-loop-helix (bHLH) family	Cluster 1; R_up_day	Cluster 1; R_up_night	Regulation overview.Regulation of gene expression.Regulation of transcription.Transcription factor.bHLH family transcription factor
VIT_05s0077g01100	Ubiquitin-conjugating enzyme E2 J1	Cluster 1; R_up_day	Cluster 1; R_up_night	Metabolism.Primary metabolism.Protein metabolism and modification.Proteolysis.cytoplasmic and nuclear protein degradation.Ubiquitin-mediated proteolysis	Metabolism.Primary metabolism.Protein metabolism and modification.Protein processing in endoplasmic reticulum
VIT_05s0077g01300	Aldo-keto reductase	Cluster 1; R_up_day	Cluster 1; R_up_night	Metabolism.Primary metabolism.Carbohydrate metabolism.Monosaccharide metabolism.Pentose glucuronate interconversion	Metabolism.Primary metabolism.Carbohydrate metabolism.Monosaccharide metabolism.Fructose and mannose metabolism	Metabolism.Primary metabolism.Carbohydrate metabolism.Monosaccharide metabolism.Galactose metabolism	Metabolism.Primary metabolism.Lipid metabolism.Glycerolipid metabolism	Metabolism.Primary metabolism.Carbohydrate metabolism.Monosaccharide metabolism.Pyruvate metabolism	Metabolism.Primary metabolism.Carbohydrate metabolism.Carbohydrate oxidation reduction
VIT_05s0077g01530	Pathogenesis protein 10 [Vitis vinifera]	Cluster 1; R_up_day	Cluster 1; R_up_night	Response to stimulus.Stress response.Biotic stress response
VIT_05s0077g01590	Major allergen Mal d 1	Cluster 1; R_up_day	Cluster 1; R_up_night	Response to stimulus.Stress response.Biotic stress response
VIT_05s0077g01660	Major allergen protein homolog	Cluster 1; R_up_day	Cluster 1; R_up_night	Response to stimulus.Stress response.Biotic stress response
VIT_05s0077g01940	Acyl-CoA dehydrogenase (ibr3)	Cluster 1; R_up_day	Cluster 1; R_up_night	Metabolism.Primary metabolism.Lipid metabolism.Fatty acid metabolism.Fatty acid catabolism.Fatty acid beta-oxidation	Metabolism.Primary metabolism.Amino acid metabolism.Valine, leucine, and isoleucine metabolism.Valine, leucine, and isoleucine catabolism	Metabolism.Primary metabolism.Amino acid metabolism.Beta-Alanine metabolism	Metabolism.Primary metabolism.Organic acid metabolism.Propanoate metabolism	Metabolism.Secondary metabolism.Iba metabolism
VIT_05s0077g01970	Zinc finger (C3HC4-type ring finger)	Cluster 1; R_up_day	Cluster 1; R_up_night	Regulation overview.Regulation of gene expression.Regulation of transcription.Transcription factor.Zinc finger C3HC4 family transcription factor
VIT_05s0077g01980	Unknown protein	Cluster 1; R_up_day	Cluster 1; R_up_night	Unknown
VIT_05s0077g02180	Chalcone reductase	Cluster 1; R_up_day	Cluster 1; R_up_night	Metabolism.Secondary metabolism.Phenylpropanoid metabolism.Flavonoid metabolism.Flavonoid biosynthesis
VIT_05s0077g02320	Hypoxia-responsive	Cluster 1; R_up_day	Cluster 1; R_up_night	Response to stimulus.Stress response.Abiotic stress response.Hypoxia stress response
VIT_05s0077g02380	DnaJ homolog	Cluster 1; R_up_day	Cluster 1; R_up_night	Transport overview.Primary Active Transporters.P-P-bond hydrolysis-driven transporters.General Secretory Pathway (Sec)	Metabolism.Primary metabolism.Protein metabolism and modification.Protein folding.Chaperone-mediated protein folding.HSP-mediated protein folding.HSP-mediated protein folding co-chaperone
VIT_05s0094g00190	Cyclin-L1-1	Cluster 1; R_up_day	Cluster 1; R_up_night	Cellular process.Cell growth and death	Regulation overview.Regulation of cell cycle
VIT_05s0094g00200	Chitinase class IV	Cluster 1; R_up_day	Cluster 1; R_up_night	Metabolism.Primary metabolism.Carbohydrate metabolism.Monosaccharide metabolism.Amino sugar metabolism	Response to stimulus.Stress response
VIT_05s0094g00220	Chitinase class IV	Cluster 1; R_up_day	Cluster 1; R_up_night	Metabolism.Primary metabolism.Carbohydrate metabolism.Monosaccharide metabolism.Amino sugar metabolism	Response to stimulus.Stress response
VIT_05s0094g00260	Chitinase	Cluster 1; R_up_day	Cluster 1; R_up_night	Metabolism.Primary metabolism.Carbohydrate metabolism.Monosaccharide metabolism.Amino sugar metabolism	Response to stimulus.Stress response
VIT_05s0094g00320	Chitinase	Cluster 1; R_up_day	Cluster 1; R_up_night	Metabolism.Primary metabolism.Carbohydrate metabolism.Monosaccharide metabolism.Amino sugar metabolism	Response to stimulus.Stress response
VIT_05s0094g00360	Chitinase class IV	Cluster 1; R_up_day	Cluster 1; R_up_night	Metabolism.Primary metabolism.Carbohydrate metabolism.Monosaccharide metabolism.Amino sugar metabolism	Response to stimulus.Stress response
VIT_05s0094g00600	H+-transporting ATPase	Cluster 1; R_up_day	Cluster 1; R_up_night	Metabolism.Primary metabolism.Generation of metabolite precursors and energy.Electron transport.Respiratory-chain phosphorylation	Transport overview.Primary Active Transporters.P-P-bond hydrolysis-driven transporters.P-type ATPase (P-ATPase).Plasma membrane H+ ATPase	Transport overview.Ion transport.Cation transport.Proton transport
VIT_05s0094g00620	Ribosomal protein S3A (RPS3aA) 40S	Cluster 1; R_up_day	Cluster 1; R_up_night	Metabolism.Primary metabolism.Protein metabolism and modification.Protein synthesis.Ribosome
VIT_05s0094g00700	Ribosomal protein SA (p40) 40S	Cluster 1; R_up_day	Cluster 1; R_up_night	Metabolism.Primary metabolism.Protein metabolism and modification.Protein synthesis.Ribosome
VIT_05s0094g00710	RNA helicase 75 PRH75	Cluster 1; R_up_day	Cluster 1; R_up_night	Transport overview.Primary Active Transporters.P-P-bond hydrolysis-driven transporters.Nuclear mRNA Exporter	Metabolism.Primary metabolism.Nucleobase, nucleoside, nucleotide, nucleic acid metabolism.Nucleic acid metabolism.RNA metabolism
VIT_05s0094g01420	Inosine-uridine preferring nucleoside hydrolase	Cluster 1; R_up_day	Cluster 1; R_up_night	Metabolism.Primary metabolism.Nucleobase, nucleoside, nucleotide, nucleic acid metabolism.Nucleotide metabolism.Purine metabolism	Metabolism.Primary metabolism.Coenzyme and prosthetic group metabolism.Nicotinate and nicotinamide metabolism
VIT_05s0094g01670	PP1/PP2A phosphatases pleiotropic regulator PRL1	Cluster 1; R_up_day	Cluster 1; R_up_night	Metabolism.Primary metabolism.Nucleobase, nucleoside, nucleotide, nucleic acid metabolism.Nucleic acid metabolism.RNA metabolism.RNA processing.mRNA processing.mRNA splicing	Transport overview.Incompletely characterized transport systems.Recognized transporters of unknown biochemical mechanism.Nuclear pore complex	Signaling.Signaling pathway
VIT_05s0094g01680	A/G-specific adenine glycosylase	Cluster 1; R_up_day	Cluster 1; R_up_night	Metabolism.Primary metabolism.Nucleobase, nucleoside, nucleotide, nucleic acid metabolism.Nucleic acid metabolism.DNA metabolism.DNA recombination and repair.repair.Base excision repair
VIT_05s0102g00010	Unknown	Cluster 1; R_up_day	Cluster 1; R_up_night	Unknown
VIT_05s0102g00200	Unknown protein	Cluster 1; R_up_day	Cluster 1; R_up_night	Unknown
VIT_05s0102g00380	Unknown	Cluster 1; R_up_day	Cluster 1; R_up_night	Unknown
VIT_05s0102g00510	Unknown protein	Cluster 1; R_up_day	Cluster 1; R_up_night	Unknown
VIT_05s0102g00670	Unknown	Cluster 1; R_up_day	Cluster 1; R_up_night	Unknown
VIT_05s0102g00740	Leucin-rich repeat protein kinase	Cluster 1; R_up_day	Cluster 1; R_up_night	Signaling.Signaling pathway.Protein kinase
VIT_05s0102g01100	R protein PRF disease resistance protein	Cluster 1; R_up_day	Cluster 1; R_up_night	Response to stimulus.Stress response.Biotic stress response.Plant-pathogen interaction.R proteins from Plant-pathogen interaction
VIT_05s0102g01130	Unknown protein	Cluster 1; R_up_day	Cluster 1; R_up_night	Unknown
VIT_05s0124g00480	2-hydroxyacyl-CoA lyase 1	Cluster 1; R_up_day	Cluster 1; R_up_night	Cellular process.Cellular component organization and biogenesis.Organelle organization and biogenesis.Peroxisome organization and biogenesis	Cellular process.Cellular transport
VIT_05s0124g00490	Oxalyl-CoA decarboxylase	Cluster 1; R_up_day	Cluster 1; R_up_night	Metabolism.Primary metabolism.Generation of metabolite precursors and energy.Glyoxylate and dicarboxylate metabolism
VIT_05s0124g00510	Oxalyl-CoA decarboxylase [Vitis vinifera]	Cluster 1; R_up_day	Cluster 1; R_up_night	Metabolism.Primary metabolism.Generation of metabolite precursors and energy.Glyoxylate and dicarboxylate metabolism
VIT_05s0124g00590	No hit	Cluster 1; R_up_day	Cluster 1; R_up_night	No hit
VIT_05s0136g00080	No hit	Cluster 1; R_up_day	Cluster 1; R_up_night	No hit
VIT_05s0136g00130	Ubiquinone biosynthesis monooxygenase Coq6	Cluster 1; R_up_day	Cluster 1; R_up_night	Metabolism.Primary metabolism.Coenzyme and prosthetic group metabolism.Biosynthesis of derivatives of dehydroquinic acid, shikimic acid and chorismic acid.Ubiquinone biosynthesis	Metabolism.Secondary metabolism.Terpenoid metabolism.Terpenoid biosynthesis.Terpenoid-quinone biosynthesis
VIT_05s0136g00190	PHD finger transcription factor	Cluster 1; R_up_day	Cluster 1; R_up_night	Regulation overview.Regulation of gene expression.Regulation of transcription.Transcription factor.PHD family transcription factor
VIT_05s0136g00250	No hit	Cluster 1; R_up_day	Cluster 1; R_up_night	No hit
VIT_05s0136g00340	WNK kinase 6	Cluster 1; R_up_day	Cluster 1; R_up_night	Signaling.Signaling pathway.Protein kinase
VIT_05s0165g00100	Elongation factor 1-alpha	Cluster 1; R_up_day	Cluster 1; R_up_night	Metabolism.Primary metabolism.Protein metabolism and modification.Protein synthesis.Translation.Translational elongation	Transport overview.Macromolecule transport.RNA transport
VIT_06s0004g00350	Hcr2-p4.1	Cluster 1; R_up_day	Cluster 1; R_up_night	Response to stimulus.Stress response.Biotic stress response
VIT_06s0004g00740	Acyl-CoA synthetases (Acyl-activating enzyme 18)	Cluster 1; R_up_day	Cluster 1; R_up_night	Metabolism.Primary metabolism.Lipid metabolism.Fatty acid metabolism	Transport overview.Group translocators.Acyl CoA ligase-coupled transporters.Proposed Fatty Acid Transporter
VIT_06s0004g00760	Leucoanthocyanidin dioxygenase-like protein	Cluster 1; R_up_day	Cluster 1; R_up_night	Metabolism.Secondary metabolism.Phenylpropanoid metabolism.Flavonoid metabolism.Flavonoid biosynthesis.Anthocyanin biosynthesis
VIT_06s0004g00770	Leucoanthocyanidin dioxygenase-like protein	Cluster 1; R_up_day	Cluster 1; R_up_night	Metabolism.Secondary metabolism.Phenylpropanoid metabolism.Flavonoid metabolism.Flavonoid biosynthesis.Anthocyanin biosynthesis
VIT_06s0004g01020	Dirigent protein	Cluster 1; R_up_day	Cluster 1; R_up_night	Response to stimulus.Stress response.Biotic stress response
VIT_06s0004g01030	Dirigent protein	Cluster 1; R_up_day	Cluster 1; R_up_night	Response to stimulus.Stress response.Biotic stress response
VIT_06s0004g01210	PRLI-interacting factor A	Cluster 1; R_up_day	Cluster 1; R_up_night	Unknown
VIT_06s0004g01430	ABA glucosidase	Cluster 1; R_up_day	Cluster 1; R_up_night	Signaling.Hormone Signaling.ABA Signaling.ABA metabolism.ABA biosynthesis
VIT_06s0004g01670	UDP-glucoronosyl and UDP-glucosyl transferase	Cluster 1; R_up_day	Cluster 1; R_up_night	Unclear
VIT_06s0004g01840	Cytochrome c-type biogenesis protein	Cluster 1; R_up_day	Cluster 1; R_up_night	Cellular process.Cellular macromolecular complex assembly.Protein complex assembly.Cytochrome complex assembly
VIT_06s0004g01850	Cytochrome c-type biogenesis protein	Cluster 1; R_up_day	Cluster 1; R_up_night	Cellular process.Cellular macromolecular complex assembly.Protein complex assembly.Cytochrome complex assembly
VIT_06s0004g01990	No hit	Cluster 1; R_up_day	Cluster 1; R_up_night	No hit
VIT_06s0004g02010	No hit	Cluster 1; R_up_day	Cluster 1; R_up_night	No hit
VIT_06s0004g02200	Unknown protein	Cluster 1; R_up_day	Cluster 1; R_up_night	Unknown
VIT_06s0004g02250	Unknown protein	Cluster 1; R_up_day	Cluster 1; R_up_night	Unknown
VIT_06s0004g02310	No hit	Cluster 1; R_up_day	Cluster 1; R_up_night	No hit
VIT_06s0004g02550	Kiwellin Ripening-related protein grip22	Cluster 1; R_up_day	Cluster 1; R_up_night	Unknown
VIT_06s0004g02590	Carbonic anhydrase	Cluster 1; R_up_day	Cluster 1; R_up_night	Metabolism.Cellular metabolism.Nitrogen and sulfur metabolism.Nitrogen metabolism	Transport overview.Electrochemical Potential-driven Transporters.Porters.Sulfate Permease	Metabolism.Cellular metabolism.One-carbon metabolism
VIT_06s0004g03120	MLO-like protein 3	Cluster 1; R_up_day	Cluster 1; R_up_night	Cellular process.Cell growth and death.Cell death	Response to stimulus.Stress response.Biotic stress response
VIT_06s0004g03270	Unknown protein	Cluster 1; R_up_day	Cluster 1; R_up_night	Unknown
VIT_06s0004g03300	2'	Cluster 1; R_up_day	Cluster 1; R_up_night	Metabolism.Primary metabolism.Protein metabolism and modification.Protein synthesis.Translation
VIT_06s0004g03330	Lateral organ boundaries protein 11	Cluster 1; R_up_day	Cluster 1; R_up_night	Regulation overview.Regulation of gene expression.Regulation of transcription.Transcription factor.AS2 family transcription factor
VIT_06s0004g03340	Ribose-5-phosphate isomerase	Cluster 1; R_up_day	Cluster 1; R_up_night	Metabolism.Primary metabolism.Carbohydrate metabolism.Monosaccharide metabolism.Monosaccharide catabolism.Pentose-phosphate shunt	Metabolism.Primary metabolism.Carbon fixation	Metabolism.Primary metabolism.Generation of metabolite precursors and energy.Photosynthesis.Calvin cycle
VIT_06s0004g03370	Unknown protein	Cluster 1; R_up_day	Cluster 1; R_up_night	Unknown
VIT_06s0004g03450	V-type H+-transporting ATPase subunit I	Cluster 1; R_up_day	Cluster 1; R_up_night	Metabolism.Primary metabolism.Generation of metabolite precursors and energy.Electron transport.Respiratory-chain phosphorylation	Transport overview.Primary Active Transporters.P-P-bond hydrolysis-driven transporters.H+ or Na+ trsloc F-t, V-t and A-t ATPase	Transport overview.Ion transport.Cation transport.Proton transport	Cellular process.Cellular transport.Protein trafficking.Vesicle-mediated trafficking.Phagosome
VIT_06s0004g03810	Kinesin motor protein	Cluster 1; R_up_day	Cluster 1; R_up_night	Cellular process.Cellular component organization and biogenesis.Cytoskeleton organization and biogenesis.Microtubule organization and biogenesis.Microtubule-driven movement
VIT_06s0004g03830	Chitinase 1	Cluster 1; R_up_day	Cluster 1; R_up_night	Metabolism.Primary metabolism.Carbohydrate metabolism.Monosaccharide metabolism.Amino sugar metabolism	Response to stimulus.Stress response
VIT_06s0004g03910	Unknown protein	Cluster 1; R_up_day	Cluster 1; R_up_night	Unknown
VIT_06s0004g04030	Copper chaperone	Cluster 1; R_up_day	Cluster 1; R_up_night	Metabolism.Primary metabolism.Protein metabolism and modification.Protein folding.Chaperone-mediated protein folding
VIT_06s0004g04380	Unknown protein	Cluster 1; R_up_day	Cluster 1; R_up_night	Unknown
VIT_06s0004g04410	SEC14 cytosolic factor	Cluster 1; R_up_day	Cluster 1; R_up_night	Transport overview.Electrochemical Potential-driven Transporters.Porters.Drug/Metabolite Transporter.Triose-phosphate Transporter	Signaling.Signaling pathway.Phosphatidylinositol Signaling	Transport overview.Macromolecule transport.Lipid transport.Phosphatidylinositol/Phosphatidyl choline transport
VIT_06s0004g04450	No hit	Cluster 1; R_up_day	Cluster 1; R_up_night	No hit
VIT_06s0004g04490	Unknown protein	Cluster 1; R_up_day	Cluster 1; R_up_night	Unknown
VIT_06s0004g04910	Unknown protein	Cluster 1; R_up_day	Cluster 1; R_up_night	Unknown
VIT_06s0004g05070	Zinc transporter (ZIP2)	Cluster 1; R_up_day	Cluster 1; R_up_night	Transport overview.Electrochemical Potential-driven Transporters.Porters.Zinc (Zn2+)-Iron (Fe2+) Permease	Transport overview.Ion transport.Cation transport.Heavy metal ion transport.Zinc transport
VIT_06s0004g05490	Myosin heavy chain	Cluster 1; R_up_day	Cluster 1; R_up_night	Cellular process.Cellular component organization and biogenesis.Cytoskeleton organization and biogenesis.Myosin-driven movement
VIT_06s0004g05660	Glycosyl transferase family 1 protein	Cluster 1; R_up_day	Cluster 1; R_up_night	Metabolism.Primary metabolism.Carbohydrate metabolism
VIT_06s0004g05710	Glutathione S-transferase GSTU7	Cluster 1; R_up_day	Cluster 1; R_up_night	Metabolism.Primary metabolism.Coenzyme and prosthetic group metabolism.Peptide derived compounds biosynthesis.Glutathione metabolism	Response to stimulus.Stress response.Abiotic stress response.Oxidative stress response
VIT_06s0004g05720	No hit	Cluster 1; R_up_day	Cluster 1; R_up_night	No hit
VIT_06s0004g05730	Universal stress protein (USP) family protein	Cluster 1; R_up_day	Cluster 1; R_up_night	Response to stimulus.Stress response
VIT_06s0004g05800	Phosphatidic acid phosphatase / PAP2	Cluster 1; R_up_day	Cluster 1; R_up_night	Metabolism.Primary metabolism.Lipid metabolism.Glycerolipid metabolism.Glycerophospholipid metabolism	Metabolism.Primary metabolism.Lipid metabolism.Ether lipid metabolism	Metabolism.Primary metabolism.Lipid metabolism.Sphingolipid metabolism
VIT_06s0004g06180	GTP-binding protein hflX	Cluster 1; R_up_day	Cluster 1; R_up_night	Signaling.Signaling pathway.G-protein signaling pathway
VIT_06s0004g06220	Na+/Pi transporter	Cluster 1; R_up_day	Cluster 1; R_up_night	Transport overview.Electrochemical Potential-driven Transporters.Porters.Inorganic Phosphate Transporter	Transport overview.Ion transport.Anion transport.Phosphate transport	Transport overview.Macromolecule transport.Carbohydrate transport.Sugar transport
VIT_06s0004g06310	Ribosomal protein P0 (RPP0A) acidic 60S	Cluster 1; R_up_day	Cluster 1; R_up_night	Metabolism.Primary metabolism.Protein metabolism and modification.Protein synthesis.Ribosome
VIT_06s0004g06370	UDP-glucose: anthocyanidin 5	Cluster 1; R_up_day	Cluster 1; R_up_night	Metabolism.Secondary metabolism.Phenylpropanoid metabolism.Flavonoid metabolism.Flavonoid biosynthesis.Anthocyanin biosynthesis.Anthocyanin-glycoside biosynthesis
VIT_06s0004g06410	Anthocyanidin 3-O-glucosyltransferase	Cluster 1; R_up_day	Cluster 1; R_up_night	Metabolism.Secondary metabolism.Phenylpropanoid metabolism.Flavonoid metabolism.Flavonoid biosynthesis.Anthocyanin biosynthesis.Anthocyanin-glycoside biosynthesis
VIT_06s0004g06450	No hit	Cluster 1; R_up_day	Cluster 1; R_up_night	No hit
VIT_06s0004g06840	Protein phosphatase 2C	Cluster 1; R_up_day	Cluster 1; R_up_night	Signaling.Signaling pathway.Protein phosphatase.PP2C
VIT_06s0004g07240	UDP-glucoronosyl and UDP-glucosyl transferase	Cluster 1; R_up_day	Cluster 1; R_up_night	Unclear
VIT_06s0004g07340	Nucleotide binding	Cluster 1; R_up_day	Cluster 1; R_up_night	Unknown
VIT_06s0004g07530	U2B'' (U2 small nuclear ribonucleoprotein B)	Cluster 1; R_up_day	Cluster 1; R_up_night	Metabolism.Primary metabolism.Nucleobase, nucleoside, nucleotide, nucleic acid metabolism.Nucleic acid metabolism.RNA metabolism.RNA processing.mRNA processing.mRNA splicing	Metabolism.Primary metabolism.Protein metabolism and modification.Protein folding
VIT_06s0004g07560	Ribosomal protein S29 28S	Cluster 1; R_up_day	Cluster 1; R_up_night	Metabolism.Primary metabolism.Protein metabolism and modification.Protein synthesis.Ribosome
VIT_06s0004g07610	Ribokinase	Cluster 1; R_up_day	Cluster 1; R_up_night	Metabolism.Primary metabolism.Carbohydrate metabolism.Monosaccharide metabolism.Monosaccharide catabolism.Pentose-phosphate shunt
VIT_06s0004g07660	Alanine--glyoxylate aminotransferase 2 2	Cluster 1; R_up_day	Cluster 1; R_up_night	Metabolism.Primary metabolism.Amino acid metabolism.Alanine and aspartate metabolism	Metabolism.Primary metabolism.Amino acid metabolism.Alanine metabolism	Metabolism.Primary metabolism.Amino acid metabolism.Glycine, serine, and threonine metabolism.Glycine metabolism	Metabolism.Primary metabolism.Generation of metabolite precursors and energy.Glyoxylate and dicarboxylate metabolism
VIT_06s0004g07690	Pentatricopeptide (PPR) repeat-containing	Cluster 1; R_up_day	Cluster 1; R_up_night	Diverse functions.Gene family with diverse functions.Pentatricopeptide domain family
VIT_06s0004g07720	S-adenosyl-L-methionine-dependent methyltransferase mraW	Cluster 1; R_up_day	Cluster 1; R_up_night	Metabolism.Cellular metabolism.Amino acid derivative metabolism.S-adenosylmethionine metabolism
VIT_06s0004g07790	Lateral organ boundaries Domain 15	Cluster 1; R_up_day	Cluster 1; R_up_night	Regulation overview.Regulation of gene expression.Regulation of transcription.Transcription factor.AS2 family transcription factor
VIT_06s0004g07820	Asp/Glu racemase	Cluster 1; R_up_day	Cluster 1; R_up_night	Unclear
VIT_06s0004g08030	Alanyl-tRNA synthetase	Cluster 1; R_up_day	Cluster 1; R_up_night	Metabolism.Primary metabolism.Amino acid metabolism.Alanine and aspartate metabolism	Metabolism.Primary metabolism.Nucleobase, nucleoside, nucleotide, nucleic acid metabolism.Nucleic acid metabolism.RNA metabolism.tRNA metabolism.tRNA processing	Metabolism.Primary metabolism.Protein metabolism and modification.Protein synthesis.Translation.Amino acid activation
VIT_06s0004g08120	No hit	Cluster 1; R_up_day	Cluster 1; R_up_night	No hit
VIT_06s0004g08250	Leucine-rich repeat transmembrane protein kinase	Cluster 1; R_up_day	Cluster 1; R_up_night	Signaling.Signaling pathway.Protein kinase
VIT_06s0004g08470	BLH7 (BELL1-like homeodomain 7)	Cluster 1; R_up_day	Cluster 1; R_up_night	Regulation overview.Regulation of gene expression.Regulation of transcription.Transcription factor.Homeobox domain family transcription factor
VIT_06s0004g08510	Unknown protein	Cluster 1; R_up_day	Cluster 1; R_up_night	Unknown
VIT_06s0009g00060	No hit	Cluster 1; R_up_day	Cluster 1; R_up_night	No hit
VIT_06s0009g00220	No hit	Cluster 1; R_up_day	Cluster 1; R_up_night	No hit
VIT_06s0009g00760	HcrVf1 protein	Cluster 1; R_up_day	Cluster 1; R_up_night	Diverse functions.Gene family with diverse functions.NBS-LRR superfamily	Response to stimulus.Stress response.Biotic stress response
VIT_06s0009g01140	Amino acid permease	Cluster 1; R_up_day	Cluster 1; R_up_night	Transport overview.Electrochemical Potential-driven Transporters.Porters.Amino Acid/Auxin Permease	Transport overview.Macromolecule transport.Amino acid transport
VIT_06s0009g01170	No hit	Cluster 1; R_up_day	Cluster 1; R_up_night	No hit
VIT_06s0009g01770	Lipase GDSL	Cluster 1; R_up_day	Cluster 1; R_up_night	Unclear
VIT_06s0009g01880	Vacuolar protein sorting-associated protein 26	Cluster 1; R_up_day	Cluster 1; R_up_night	Transport overview.Macromolecule transport.Protein transport.Protein coat	Cellular process.Cellular transport.Protein trafficking.Vesicle-mediated trafficking
VIT_06s0009g02490	Urease accessory protein F	Cluster 1; R_up_day	Cluster 1; R_up_night	Regulation overview.Regulation of gene expression
VIT_06s0009g02560	Pectinesterase family	Cluster 1; R_up_day	Cluster 1; R_up_night	Cellular process.Cellular component organization and biogenesis.Cell wall organization and biogenesis.Cell wall metabolism.Cell wall modification.Pectin modification
VIT_06s0009g02910	Flavonoid 3'	Cluster 1; R_up_day	Cluster 1; R_up_night	Metabolism.Secondary metabolism.Phenylpropanoid metabolism.Flavonoid metabolism.Flavonoid biosynthesis
VIT_06s0009g03090	Geranyl diphosphate synthase	Cluster 1; R_up_day	Cluster 1; R_up_night	Metabolism.Primary metabolism.Lipid metabolism.Steroid metabolism.Steroid biosynthesis	Metabolism.Secondary metabolism.Terpenoid metabolism.Terpenoid biosynthesis
VIT_06s0009g03120	Cytochrome P450	Cluster 1; R_up_day	Cluster 1; R_up_night	Metabolism.Secondary metabolism.Primary amino acids derivated metabolism.Glucosinolate metabolism	Metabolism.Cellular metabolism.Oxidation reduction.Cytochrome P450 oxidoreductase
VIT_06s0009g03130	Cytochrome P450	Cluster 1; R_up_day	Cluster 1; R_up_night	Metabolism.Secondary metabolism.Primary amino acids derivated metabolism.Glucosinolate metabolism	Metabolism.Cellular metabolism.Oxidation reduction.Cytochrome P450 oxidoreductase
VIT_06s0009g03370	No hit	Cluster 1; R_up_day	Cluster 1; R_up_night	No hit
VIT_06s0009g03430	Zinc finger (C3HC4-type ring finger)	Cluster 1; R_up_day	Cluster 1; R_up_night	Regulation overview.Regulation of gene expression.Regulation of transcription.Transcription factor.Zinc finger C3HC4 family transcription factor
VIT_06s0009g03580	No hit	Cluster 1; R_up_day	Cluster 1; R_up_night	No hit
VIT_06s0009g03670	F-box family protein	Cluster 1; R_up_day	Cluster 1; R_up_night	Metabolism.Primary metabolism.Protein metabolism and modification.Proteolysis.cytoplasmic and nuclear protein degradation.Ubiquitin-mediated proteolysis
VIT_06s0009g03700	V-type H+-transporting ATPase subunit B	Cluster 1; R_up_day	Cluster 1; R_up_night	Metabolism.Primary metabolism.Generation of metabolite precursors and energy.Electron transport.Respiratory-chain phosphorylation	Transport overview.Primary Active Transporters.P-P-bond hydrolysis-driven transporters.H+ or Na+ trsloc F-t, V-t and A-t ATPase	Transport overview.Ion transport.Cation transport.Proton transport	Cellular process.Cellular transport.Protein trafficking.Vesicle-mediated trafficking.Phagosome
VIT_06s0009g03710	No hit	Cluster 1; R_up_day	Cluster 1; R_up_night	No hit
VIT_06s0009g03720	No hit	Cluster 1; R_up_day	Cluster 1; R_up_night	No hit
VIT_06s0061g00100	Glucan endo-1	Cluster 1; R_up_day	Cluster 1; R_up_night	Metabolism.Primary metabolism.Carbohydrate metabolism.Polysaccharide metabolism.Starch and sucrose metabolism	Metabolism.Primary metabolism.Carbohydrate metabolism.Polysaccharide metabolism.Beta-1,3 glucan metabolism.Beta-1,3 glucan catabolism
VIT_06s0061g00120	Beta-1	Cluster 1; R_up_day	Cluster 1; R_up_night	Metabolism.Primary metabolism.Carbohydrate metabolism.Polysaccharide metabolism.Beta-1,3 glucan metabolism.Beta-1,3 glucan catabolism
VIT_06s0061g00430	Ribosomal protein L18	Cluster 1; R_up_day	Cluster 1; R_up_night	Metabolism.Primary metabolism.Protein metabolism and modification.Protein synthesis.Ribosome
VIT_06s0061g00660	No hit	Cluster 1; R_up_day	Cluster 1; R_up_night	No hit
VIT_06s0061g01090	No hit	Cluster 1; R_up_day	Cluster 1; R_up_night	No hit
VIT_06s0061g01150	Unknown	Cluster 1; R_up_day	Cluster 1; R_up_night	Unknown
VIT_06s0061g01320	No hit	Cluster 1; R_up_day	Cluster 1; R_up_night	No hit
VIT_06s0061g01410	TRNA isopentenyltransferase	Cluster 1; R_up_day	Cluster 1; R_up_night	Metabolism.Primary metabolism.Lipid metabolism.Steroid metabolism.Steroid biosynthesis
VIT_06s0080g00040	ABC transporter G member 22	Cluster 1; R_up_day	Cluster 1; R_up_night	Transport overview.Macromolecule transport.Multidrug transport.Multidrug ABC transport
VIT_06s0080g00050	ABC transporter G member 22	Cluster 1; R_up_day	Cluster 1; R_up_night	Transport overview.Macromolecule transport.Multidrug transport.Multidrug ABC transport
VIT_06s0080g00260	Seed maturation protein PM38	Cluster 1; R_up_day	Cluster 1; R_up_night	Response to stimulus.Stress response.Biotic stress response
VIT_06s0080g00270	Zinc finger (C2H2 type) protein (WIP3)	Cluster 1; R_up_day	Cluster 1; R_up_night	Regulation overview.Regulation of gene expression.Regulation of transcription.Transcription factor.C2H2 family transcription factor
VIT_06s0080g00310	Esterase/lipase/thioesterase family protein	Cluster 1; R_up_day	Cluster 1; R_up_night	Unclear
VIT_06s0080g00400	Ribosomal protein L10A (RPL10aA) 60S	Cluster 1; R_up_day	Cluster 1; R_up_night	Metabolism.Primary metabolism.Protein metabolism and modification.Protein synthesis.Ribosome
VIT_06s0080g00610	No hit	Cluster 1; R_up_day	Cluster 1; R_up_night	No hit
VIT_06s0080g00950	Nitrilase	Cluster 1; R_up_day	Cluster 1; R_up_night	Metabolism.Cellular metabolism.Amino acid derivative metabolism.Cyanoamino acid metabolism	Metabolism.Cellular metabolism.Nitrogen and sulfur metabolism.Nitrogen metabolism	Signaling.Hormone Signaling.Auxin Signaling.Auxin metabolism
VIT_06s0080g01000	Secoisolariciresinol dehydrogenase	Cluster 1; R_up_day	Cluster 1; R_up_night	Metabolism.Secondary metabolism.Phenylpropanoid metabolism.Phenylpropanoid biosynthesis	Metabolism.Secondary metabolism.Phenylpropanoid metabolism.Lignan metabolism.Lignan biosynthesis
VIT_06s0080g01020	Secoisolariciresinol dehydrogenase	Cluster 1; R_up_day	Cluster 1; R_up_night	Metabolism.Secondary metabolism.Phenylpropanoid metabolism.Phenylpropanoid biosynthesis	Metabolism.Secondary metabolism.Phenylpropanoid metabolism.Lignan metabolism.Lignan biosynthesis
VIT_06s0080g01060	Calcium-binding EF hand	Cluster 1; R_up_day	Cluster 1; R_up_night	Unknown
VIT_07s0005g00070		Cluster 1; R_up_day	Cluster 1; R_up_night	Metabolism.Primary metabolism.Generation of metabolite precursors and energy.Glyoxylate and dicarboxylate metabolism	Metabolism.Cellular metabolism.One-carbon metabolism	Metabolism.Primary metabolism.Coenzyme and prosthetic group metabolism.Folate metabolism
VIT_07s0005g00110	Rapid ALkalinization Factor RALFL11	Cluster 1; R_up_day	Cluster 1; R_up_night	Signaling.Signaling pathway.Signaling molecules.Signaling peptide
VIT_07s0005g00260	Glutathione-conjugate transporter (MRP10)	Cluster 1; R_up_day	Cluster 1; R_up_night	Transport overview.Macromolecule transport.Multidrug transport.Multidrug ABC transport
VIT_07s0005g00350	No hit	Cluster 1; R_up_day	Cluster 1; R_up_night	No hit
VIT_07s0005g00360	Glycosyl hydrolase family 1	Cluster 1; R_up_day	Cluster 1; R_up_night	Metabolism.Primary metabolism.Carbohydrate metabolism.Carbohydrate catabolism
VIT_07s0005g00370	Glycosyl hydrolase family 1 protein	Cluster 1; R_up_day	Cluster 1; R_up_night	Metabolism.Primary metabolism.Carbohydrate metabolism.Carbohydrate catabolism
VIT_07s0005g00380	Glycosyl hydrolase family 1 protein	Cluster 1; R_up_day	Cluster 1; R_up_night	Metabolism.Primary metabolism.Carbohydrate metabolism.Carbohydrate catabolism
VIT_07s0005g00390	Beta Glucosidase 11	Cluster 1; R_up_day	Cluster 1; R_up_night	Metabolism.Primary metabolism.Carbohydrate metabolism.Oligosaccharide metabolism.Glycan metabolism.Glycan catabolism
VIT_07s0005g00600	O-methyltransferase	Cluster 1; R_up_day	Cluster 1; R_up_night	Unknown
VIT_07s0005g00620	U3 small nucleolar RNA-associated protein 14	Cluster 1; R_up_day	Cluster 1; R_up_night	Metabolism.Primary metabolism.Nucleobase, nucleoside, nucleotide, nucleic acid metabolism.Nucleic acid metabolism	Metabolism.Primary metabolism.Protein metabolism and modification.Protein synthesis.Ribosome	Cellular process.Cellular component organization and biogenesis.Ribosome organization and biogenesis
VIT_07s0005g00700	Epoxide hydrolase	Cluster 1; R_up_day	Cluster 1; R_up_night	Metabolism.Cellular metabolism.Epoxide hydrolase family	Response to stimulus.Stress response.Biotic stress response
VIT_07s0005g01700	Transcription regulator	Cluster 1; R_up_day	Cluster 1; R_up_night	Regulation overview.Regulation of gene expression.Regulation of transcription.Transcriptional co-activation
VIT_07s0005g02110	Protein phosphatase 2C DBP	Cluster 1; R_up_day	Cluster 1; R_up_night	Regulation overview.Regulation of gene expression.Regulation of transcription.Transcription factor.DBP family transcription factor
VIT_07s0005g02850	No hit	Cluster 1; R_up_day	Cluster 1; R_up_night	No hit
VIT_07s0005g03340	Myb domain protein 14	Cluster 1; R_up_day	Cluster 1; R_up_night	Regulation overview.Regulation of gene expression.Regulation of transcription.Transcription factor.MYB family transcription factor
VIT_07s0005g03800	Unknown protein	Cluster 1; R_up_day	Cluster 1; R_up_night	Unknown
VIT_07s0005g03810	Unknown protein	Cluster 1; R_up_day	Cluster 1; R_up_night	Unknown
VIT_07s0005g04000	No hit	Cluster 1; R_up_day	Cluster 1; R_up_night	No hit
VIT_07s0005g04050	Leucine Rich Repeat receptor-like kinase	Cluster 1; R_up_day	Cluster 1; R_up_night	Signaling.Signaling pathway.Protein kinase
VIT_07s0005g04540	Poly(A) binding protein 8	Cluster 1; R_up_day	Cluster 1; R_up_night	Unknown
VIT_07s0005g04580	Xyloglucanase inhibitor	Cluster 1; R_up_day	Cluster 1; R_up_night	Unclear
VIT_07s0005g04660	ABC transporter C member 9	Cluster 1; R_up_day	Cluster 1; R_up_night	Transport overview.Macromolecule transport.Multidrug transport.Multidrug ABC transport
VIT_07s0005g04820	PAPA-1	Cluster 1; R_up_day	Cluster 1; R_up_night	Unclear
VIT_07s0005g04890	Glutathione S-transferase 25 GSTU7	Cluster 1; R_up_day	Cluster 1; R_up_night	Metabolism.Primary metabolism.Coenzyme and prosthetic group metabolism.Peptide derived compounds biosynthesis.Glutathione metabolism	Response to stimulus.Stress response.Abiotic stress response.Oxidative stress response
VIT_07s0005g05110	Transaldolase	Cluster 1; R_up_day	Cluster 1; R_up_night	Metabolism.Primary metabolism.Carbohydrate metabolism.Monosaccharide metabolism.Monosaccharide catabolism.Pentose-phosphate shunt
VIT_07s0005g05540	No hit	Cluster 1; R_up_day	Cluster 1; R_up_night	No hit
VIT_07s0005g05590	Unknown	Cluster 1; R_up_day	Cluster 1; R_up_night	Unknown
VIT_07s0005g05610	3-ketoacyl-CoA thiolase PED1	Cluster 1; R_up_day	Cluster 1; R_up_night	Metabolism.Primary metabolism.Lipid metabolism.Fatty acid metabolism.Fatty acid biosynthesis.Fatty acid elongation	Metabolism.Primary metabolism.Lipid metabolism.Fatty acid metabolism.Fatty acid catabolism.Fatty acid beta-oxidation	Metabolism.Primary metabolism.Amino acid metabolism.Valine, leucine, and isoleucine metabolism.Valine, leucine, and isoleucine catabolism	Metabolism.Primary metabolism.Lipid metabolism.Fatty acid metabolism.Alpha-linolenic acid metabolism	Metabolism.Secondary metabolism.Iba metabolism	Cellular process.Cellular component organization and biogenesis.Organelle organization and biogenesis.Peroxisome organization and biogenesis
VIT_07s0005g05680	Tetratricopeptide repeat domain male sterility MS5	Cluster 1; R_up_day	Cluster 1; R_up_night	Unknown
VIT_07s0005g05820	Brassinosteroid biosynthetic protein DWARF1	Cluster 1; R_up_day	Cluster 1; R_up_night	Metabolism.Primary metabolism.Lipid metabolism.Steroid metabolism.Steroid biosynthesis
VIT_07s0005g05910	Auxin-binding protein ABP19	Cluster 1; R_up_day	Cluster 1; R_up_night	Signaling.Hormone Signaling.Auxin Signaling.Auxin-mediated Signaling pathway
VIT_07s0005g05920	Auxin-binding protein ABP19	Cluster 1; R_up_day	Cluster 1; R_up_night	Signaling.Hormone Signaling.Auxin Signaling.Auxin-mediated Signaling pathway
VIT_07s0005g05930	Auxin-binding protein ABP19	Cluster 1; R_up_day	Cluster 1; R_up_night	Signaling.Hormone Signaling.Auxin Signaling.Auxin-mediated Signaling pathway
VIT_07s0005g05950	FAD linked oxidase	Cluster 1; R_up_day	Cluster 1; R_up_night	Unclear
VIT_07s0005g05960	Cytokinin dehydrogenase 5 precursor	Cluster 1; R_up_day	Cluster 1; R_up_night	Signaling.Hormone Signaling.Cytokinin Signaling.Cytokinin metabolism.Cytokinin catabolism
VIT_07s0005g06010	FAD linked oxidase	Cluster 1; R_up_day	Cluster 1; R_up_night	Unclear
VIT_07s0005g06020	Galacturonosyltransferase 14	Cluster 1; R_up_day	Cluster 1; R_up_night	Cellular process.Cellular component organization and biogenesis.Cell wall organization and biogenesis.Cell wall metabolism.Cell wall biosynthesis.Pectin biosynthesis
VIT_07s0005g06350	Photosystem II 47 kDa protein	Cluster 1; R_up_day	Cluster 1; R_up_night	Metabolism.Primary metabolism.Generation of metabolite precursors and energy.Photosynthesis.Photosystem II	Transport overview.Primary Active Transporters.Light absorption-driven transporters.Photosynthetic Reaction Center
VIT_07s0005g06480	EMB1974 (embryo defective 1974)	Cluster 1; R_up_day	Cluster 1; R_up_night	Development.Reproductive development.Embryo development
VIT_07s0005g06590	MADS-box agamous-like 62	Cluster 1; R_up_day	Cluster 1; R_up_night	Regulation overview.Regulation of gene expression.Regulation of transcription.Transcription factor.MADS-box family transcription factor
VIT_07s0005g06610	Unknown protein	Cluster 1; R_up_day	Cluster 1; R_up_night	Unknown
VIT_07s0005g06620	Unknown protein	Cluster 1; R_up_day	Cluster 1; R_up_night	Unknown
VIT_07s0005g06650	Molecular chaperone DnaK	Cluster 1; R_up_day	Cluster 1; R_up_night	Metabolism.Primary metabolism.Nucleobase, nucleoside, nucleotide, nucleic acid metabolism.Nucleic acid metabolism.RNA metabolism.RNA catabolism	Transport overview.Channels and pores.a-Type channels.Cation Channel-forming Heat Shock Protein-70	Metabolism.Primary metabolism.Protein metabolism and modification.Protein folding.Chaperone-mediated protein folding.HSP-mediated protein folding	Response to stimulus.Stress response.Abiotic stress response.Temperature stress response
VIT_07s0005g06710	No hit	Cluster 1; R_up_day	Cluster 1; R_up_night	No hit
VIT_07s0031g00030	Endoplasmatic reticulum retrieval protein 1A	Cluster 1; R_up_day	Cluster 1; R_up_night	Transport overview.Incompletely characterized transport systems.Putative transport protein.ER Retrieval Prot1 (Heavy Metal Tr)	Cellular process.Cellular transport.Protein trafficking.Vesicle-mediated trafficking
VIT_07s0031g00070	No hit	Cluster 1; R_up_day	Cluster 1; R_up_night	No hit
VIT_07s0031g00090	TRNA-dihydrouridine synthase B	Cluster 1; R_up_day	Cluster 1; R_up_night	Metabolism.Primary metabolism.Nucleobase, nucleoside, nucleotide, nucleic acid metabolism.Nucleotide metabolism.Pyrimidine metabolism	Metabolism.Primary metabolism.Nucleobase, nucleoside, nucleotide, nucleic acid metabolism.Nucleic acid metabolism.RNA metabolism.tRNA metabolism.tRNA processing
VIT_07s0031g00220	APETALA2 (AP2) floral homeotic protein	Cluster 1; R_up_day	Cluster 1; R_up_night	Signaling.Hormone Signaling.Ethylene Signaling.Ethylene-mediated Signaling pathway	Development.Reproductive development.Flower development	Regulation overview.Regulation of gene expression.Regulation of transcription.Transcription factor.AP2 family transcription factor
VIT_07s0031g00230	E3 ubiquitin-protein ligase MARCH6	Cluster 1; R_up_day	Cluster 1; R_up_night	Regulation overview.Regulation of gene expression.Regulation of transcription.Transcription factor.Zinc finger C3HC4 family transcription factor	Metabolism.Primary metabolism.Protein metabolism and modification.Protein processing in endoplasmic reticulum
VIT_07s0031g00360	No hit	Cluster 1; R_up_day	Cluster 1; R_up_night	No hit
VIT_07s0031g00420	SHN1 (SHINE 1)	Cluster 1; R_up_day	Cluster 1; R_up_night	Signaling.Hormone Signaling.Ethylene Signaling.Ethylene-mediated Signaling pathway	Regulation overview.Regulation of gene expression.Regulation of transcription.Transcription factor.AP2 family transcription factor
VIT_07s0031g00460	Nicotinate phosphoribosyltransferase	Cluster 1; R_up_day	Cluster 1; R_up_night	Metabolism.Primary metabolism.Coenzyme and prosthetic group metabolism.Nicotinate and nicotinamide metabolism.NAD biosynthesis
VIT_07s0031g00530	MAPKKK21	Cluster 1; R_up_day	Cluster 1; R_up_night	Signaling.Signaling pathway.Protein kinase.MAPK cascade
VIT_07s0031g00810	No hit	Cluster 1; R_up_day	Cluster 1; R_up_night	No hit
VIT_07s0031g01010	L-ascorbate oxidase	Cluster 1; R_up_day	Cluster 1; R_up_night	Metabolism.Primary metabolism.Organic acid metabolism.Ascorbate and aldarate metabolism	Transport overview.Incompletely characterized transport systems.Recognized transporters of unknown biochemical mechanism.Iron/Lead Transporter.Oxidase-dep Fe2+ Transporter	Response to stimulus.Stress response.Abiotic stress response.Oxidative stress response
VIT_07s0031g01040	L-ascorbate oxidase	Cluster 1; R_up_day	Cluster 1; R_up_night	Metabolism.Primary metabolism.Organic acid metabolism.Ascorbate and aldarate metabolism	Transport overview.Incompletely characterized transport systems.Recognized transporters of unknown biochemical mechanism.Iron/Lead Transporter.Oxidase-dep Fe2+ Transporter	Response to stimulus.Stress response.Abiotic stress response.Oxidative stress response
VIT_07s0031g01050	Ascorbate oxidase	Cluster 1; R_up_day	Cluster 1; R_up_night	Metabolism.Primary metabolism.Organic acid metabolism.Ascorbate and aldarate metabolism	Transport overview.Incompletely characterized transport systems.Recognized transporters of unknown biochemical mechanism.Iron/Lead Transporter.Oxidase-dep Fe2+ Transporter
VIT_07s0031g01070	Ascorbate oxidase	Cluster 1; R_up_day	Cluster 1; R_up_night	Metabolism.Primary metabolism.Organic acid metabolism.Ascorbate and aldarate metabolism	Transport overview.Incompletely characterized transport systems.Recognized transporters of unknown biochemical mechanism.Iron/Lead Transporter.Oxidase-dep Fe2+ Transporter
VIT_07s0031g01090	Ascorbate oxidase	Cluster 1; R_up_day	Cluster 1; R_up_night	Metabolism.Primary metabolism.Organic acid metabolism.Ascorbate and aldarate metabolism	Transport overview.Incompletely characterized transport systems.Recognized transporters of unknown biochemical mechanism.Iron/Lead Transporter.Oxidase-dep Fe2+ Transporter
VIT_07s0031g01120	Ascorbate oxidase	Cluster 1; R_up_day	Cluster 1; R_up_night	Metabolism.Primary metabolism.Organic acid metabolism.Ascorbate and aldarate metabolism	Transport overview.Incompletely characterized transport systems.Recognized transporters of unknown biochemical mechanism.Iron/Lead Transporter.Oxidase-dep Fe2+ Transporter
VIT_07s0031g01130	Ascorbate oxidase	Cluster 1; R_up_day	Cluster 1; R_up_night	Metabolism.Primary metabolism.Organic acid metabolism.Ascorbate and aldarate metabolism	Transport overview.Incompletely characterized transport systems.Recognized transporters of unknown biochemical mechanism.Iron/Lead Transporter.Oxidase-dep Fe2+ Transporter
VIT_07s0031g01710	WRKY DNA-binding protein 51	Cluster 1; R_up_day	Cluster 1; R_up_night	Regulation overview.Regulation of gene expression.Regulation of transcription.Transcription factor.WRKY family transcription factor
VIT_07s0031g01880	Ubiquitin-specific protease 27	Cluster 1; R_up_day	Cluster 1; R_up_night	Metabolism.Primary metabolism.Protein metabolism and modification.Proteolysis.cytoplasmic and nuclear protein degradation.Ubiquitin-mediated proteolysis
VIT_07s0031g01930	Myb TKI1 (TSL-kinase interacting protein 1)	Cluster 1; R_up_day	Cluster 1; R_up_night	Regulation overview.Regulation of gene expression.Regulation of transcription.Transcription factor.MYB-related family transcription factor
VIT_07s0031g01980	Ethylene-responsive transcription factor aba repressor 1 abr1/erf111	Cluster 1; R_up_day	Cluster 1; R_up_night	Signaling.Hormone Signaling.ABA Signaling.ABA-mediated Signaling pathway	Signaling.Hormone Signaling.Ethylene Signaling.Ethylene-mediated Signaling pathway	Regulation overview.Regulation of gene expression.Regulation of transcription.Transcription factor.AP2 family transcription factor
VIT_07s0031g02260	Unknown protein	Cluster 1; R_up_day	Cluster 1; R_up_night	Unknown
VIT_07s0031g02670	Delay of germination 1	Cluster 1; R_up_day	Cluster 1; R_up_night	Regulation overview.Regulation of gene expression.Regulation of transcription.Transcription factor.bZIP family transcription factor
VIT_07s0031g02730	Reticulon-like protein B1 RTNLB1	Cluster 1; R_up_day	Cluster 1; R_up_night	Unclear
VIT_07s0095g00060	Cystathionine gamma-synthase isoform 1	Cluster 1; R_up_day	Cluster 1; R_up_night	Metabolism.Primary metabolism.Amino acid metabolism.Methionine metabolism	Metabolism.Primary metabolism.Amino acid metabolism.Cysteine metabolism	Metabolism.Cellular metabolism.Amino acid derivative metabolism.Selenoamino acid metabolism	Metabolism.Cellular metabolism.Nitrogen and sulfur metabolism.Nitrogen metabolism	Metabolism.Cellular metabolism.Nitrogen and sulfur metabolism.Sulfur metabolism	Metabolism.Primary metabolism.Amino acid metabolism.Cysteine and methionine metabolism
VIT_07s0095g00180	S-receptor kinase 1	Cluster 1; R_up_day	Cluster 1; R_up_night	Signaling.Signaling pathway.Protein kinase
VIT_07s0095g00420	Unknown	Cluster 1; R_up_day	Cluster 1; R_up_night	Unknown
VIT_07s0095g00630	No hit	Cluster 1; R_up_day	Cluster 1; R_up_night	No hit
VIT_07s0095g00660	Curculin (mannose-binding) lectin	Cluster 1; R_up_day	Cluster 1; R_up_night	Unknown
VIT_07s0095g00720	Heat shock protein 81-4 (HSP81-4)	Cluster 1; R_up_day	Cluster 1; R_up_night	Metabolism.Primary metabolism.Protein metabolism and modification.Protein folding.Chaperone-mediated protein folding.HSP-mediated protein folding	Response to stimulus.Stress response.Biotic stress response.Plant-pathogen interaction	Metabolism.Primary metabolism.Protein metabolism and modification.Protein processing in endoplasmic reticulum
VIT_07s0104g00140	No hit	Cluster 1; R_up_day	Cluster 1; R_up_night	No hit
VIT_07s0104g00170	Glutamine synthetase	Cluster 1; R_up_day	Cluster 1; R_up_night	Metabolism.Primary metabolism.Amino acid metabolism.Glutamate metabolism	Metabolism.Primary metabolism.Carbohydrate metabolism.Oligosaccharide metabolism.Glycan metabolism.Peptidoglycan biosynthesis	Metabolism.Cellular metabolism.Nitrogen and sulfur metabolism.Nitrogen metabolism	Metabolism.Primary metabolism.Amino acid metabolism.Amino acid biosynthesis	Metabolism.Primary metabolism.Amino acid metabolism.Glutamine metabolism.Glutamine biosynthesis
VIT_07s0104g00550	GTP binding protein	Cluster 1; R_up_day	Cluster 1; R_up_night	Unknown
VIT_07s0104g00650	No hit	Cluster 1; R_up_day	Cluster 1; R_up_night	No hit
VIT_07s0104g00860	WD40	Cluster 1; R_up_day	Cluster 1; R_up_night	Unknown
VIT_07s0104g00870	WD40	Cluster 1; R_up_day	Cluster 1; R_up_night	Unknown
VIT_07s0104g01350	Integral membrane family protein UPF0497	Cluster 1; R_up_day	Cluster 1; R_up_night	Unknown
VIT_07s0104g01660	HAK5 (High affinity K+ transporter 5)	Cluster 1; R_up_day	Cluster 1; R_up_night	Transport overview.Electrochemical Potential-driven Transporters.Porters.K+ uptake porter (aka permease)	Transport overview.Ion transport.Cation transport.Potassium transport
VIT_07s0104g01710	HAK5 (High affinity K+ transporter 5)	Cluster 1; R_up_day	Cluster 1; R_up_night	Transport overview.Electrochemical Potential-driven Transporters.Porters.K+ uptake porter (aka permease)	Transport overview.Ion transport.Cation transport.Potassium transport
VIT_07s0104g01780	Autophagy 18 ATG18a	Cluster 1; R_up_day	Cluster 1; R_up_night	Metabolism.Cellular metabolism.Cellular catabolism.Autophagy
VIT_07s0129g00050	Unknown protein	Cluster 1; R_up_day	Cluster 1; R_up_night	Unknown
VIT_07s0129g00500	Seed maturation protein PM21	Cluster 1; R_up_day	Cluster 1; R_up_night	Response to stimulus.Stress response.Biotic stress response
VIT_07s0129g00710	CYP81E1 Isoflavone 2'-hydroxylase	Cluster 1; R_up_day	Cluster 1; R_up_night	Metabolism.Secondary metabolism.Phenylpropanoid metabolism.Flavonoid metabolism.Isoflavonoid metabolism.Isoflavonoid biosynthesis	Metabolism.Cellular metabolism.Oxidation reduction.Cytochrome P450 oxidoreductase
VIT_07s0129g00760	CYP81E1 Isoflavone 2'-hydroxylase	Cluster 1; R_up_day	Cluster 1; R_up_night	Metabolism.Secondary metabolism.Phenylpropanoid metabolism.Flavonoid metabolism.Isoflavonoid metabolism.Isoflavonoid biosynthesis	Metabolism.Cellular metabolism.Oxidation reduction.Cytochrome P450 oxidoreductase
VIT_07s0129g01010	Unknown	Cluster 1; R_up_day	Cluster 1; R_up_night	Unknown
VIT_07s0130g00010	Peroxiredoxin-2B	Cluster 1; R_up_day	Cluster 1; R_up_night	Response to stimulus.Stress response.Abiotic stress response.Oxidative stress response
VIT_07s0141g00010	Unknown	Cluster 1; R_up_day	Cluster 1; R_up_night	Unknown
VIT_07s0141g00440	Unc51-like kinase	Cluster 1; R_up_day	Cluster 1; R_up_night	Metabolism.Cellular metabolism.Cellular catabolism.Autophagy	Signaling.Signaling pathway.TOR Signaling pathway	Regulation overview.Regulation of gene expression.Regulation of transcription.Transcription factor.ARF family transcription factor	Signaling.Signaling pathway.Protein kinase
VIT_07s0141g00520	Serine carboxypeptidase 1 precursor	Cluster 1; R_up_day	Cluster 1; R_up_night	Metabolism.Primary metabolism.Protein metabolism and modification.Proteolysis.Peptidase-mediated proteolysis
VIT_07s0141g00580	Glycosyl transferase family 8 protein	Cluster 1; R_up_day	Cluster 1; R_up_night	Metabolism.Primary metabolism.Carbohydrate metabolism.Glycosyl transference
VIT_07s0141g00880	Unknown protein	Cluster 1; R_up_day	Cluster 1; R_up_night	Unknown
VIT_07s0141g00980	CC-NBS-LRR class	Cluster 1; R_up_day	Cluster 1; R_up_night	Diverse functions.Gene family with diverse functions.NBS-LRR superfamily
VIT_07s0141g01080	Digalactosyldiacylglycerol synthase 2	Cluster 1; R_up_day	Cluster 1; R_up_night	Metabolism.Primary metabolism.Lipid metabolism.Glycerolipid metabolism.Glycerolipid biosynthesis
VIT_07s0151g00830	HSP20 chaperone	Cluster 1; R_up_day	Cluster 1; R_up_night	Metabolism.Primary metabolism.Protein metabolism and modification.Protein folding.Chaperone-mediated protein folding.HSP-mediated protein folding
VIT_07s0151g00840	Late embryogenesis abundant protein D-34 (LEA D-34)	Cluster 1; R_up_day	Cluster 1; R_up_night	Response to stimulus.Stress response.Abiotic stress response.Desiccation stress response
VIT_07s0151g01070	Copalyl diphosphate synthase	Cluster 1; R_up_day	Cluster 1; R_up_night	Metabolism.Secondary metabolism.Terpenoid metabolism.Diterpenoid metabolism.Diterpenoid biosynthesis
VIT_07s0185g00070	No hit	Cluster 1; R_up_day	Cluster 1; R_up_night	No hit
VIT_07s0185g00170	Hexaprenyldihydroxybenzoate methyltransferase	Cluster 1; R_up_day	Cluster 1; R_up_night	Metabolism.Primary metabolism.Coenzyme and prosthetic group metabolism.Biosynthesis of derivatives of dehydroquinic acid, shikimic acid and chorismic acid.Ubiquinone biosynthesis	Metabolism.Secondary metabolism.Terpenoid metabolism.Terpenoid biosynthesis.Terpenoid-quinone biosynthesis
VIT_07s0197g00020	Lateral organ boundaries domain gene 36	Cluster 1; R_up_day	Cluster 1; R_up_night	Regulation overview.Regulation of gene expression.Regulation of transcription.Transcription factor.AS2 family transcription factor
VIT_07s0197g00230	Disease resistance protein (CC-NBS-LRR class)	Cluster 1; R_up_day	Cluster 1; R_up_night	Diverse functions.Gene family with diverse functions.NBS-LRR superfamily	Response to stimulus.Stress response.Biotic stress response
VIT_07s0255g00090	CYP82C1p	Cluster 1; R_up_day	Cluster 1; R_up_night	Metabolism.Cellular metabolism.Oxidation reduction.Cytochrome P450 oxidoreductase
VIT_07s0255g00100	Extra-large G-protein (XLG1)	Cluster 1; R_up_day	Cluster 1; R_up_night	Signaling.Signaling pathway.G-protein signaling pathway
VIT_07s0255g00150	Kinase	Cluster 1; R_up_day	Cluster 1; R_up_night	Signaling.Signaling pathway.Protein kinase
VIT_08s0007g00180	OBP3 (OBF-binding protein 3)	Cluster 1; R_up_day	Cluster 1; R_up_night	Signaling.Hormone Signaling.Jasmonate salicylate signaling.Jasmonate Signaling.Jasmonate-mediated Signaling pathway	Regulation overview.Regulation of gene expression.Regulation of transcription.Transcription factor.C2C2-DOF family transcription factor
VIT_08s0007g00430	C2 domain containing protein	Cluster 1; R_up_day	Cluster 1; R_up_night	Signaling.Signaling pathway.Protein kinase
VIT_08s0007g00720	Ring-H2 finger C2A	Cluster 1; R_up_day	Cluster 1; R_up_night	Regulation overview.Regulation of gene expression.Regulation of transcription.Transcription factor.Zinc finger C3HC4 family transcription factor
VIT_08s0007g00830	Lectin protein kinase	Cluster 1; R_up_day	Cluster 1; R_up_night	Signaling.Signaling pathway.Protein kinase
VIT_08s0007g00970	Translation initiation factor eIF-3 subunit 3	Cluster 1; R_up_day	Cluster 1; R_up_night	Metabolism.Primary metabolism.Protein metabolism and modification.Protein synthesis.Translation	Transport overview.Macromolecule transport.RNA transport
VIT_08s0007g01010	Aldo/keto reductase	Cluster 1; R_up_day	Cluster 1; R_up_night	Metabolism.Primary metabolism.Carbohydrate metabolism.Monosaccharide metabolism.Pentose glucuronate interconversion	Metabolism.Primary metabolism.Carbohydrate metabolism.Monosaccharide metabolism.Fructose and mannose metabolism	Metabolism.Primary metabolism.Carbohydrate metabolism.Monosaccharide metabolism.Galactose metabolism	Metabolism.Primary metabolism.Lipid metabolism.Glycerolipid metabolism	Metabolism.Primary metabolism.Carbohydrate metabolism.Monosaccharide metabolism.Pyruvate metabolism	Metabolism.Primary metabolism.Carbohydrate metabolism.Carbohydrate oxidation reduction
VIT_08s0007g01120	No hit	Cluster 1; R_up_day	Cluster 1; R_up_night	No hit
VIT_08s0007g01150	Unc51-like kinase	Cluster 1; R_up_day	Cluster 1; R_up_night	Metabolism.Cellular metabolism.Cellular catabolism.Autophagy	Signaling.Signaling pathway.TOR Signaling pathway	Signaling.Signaling pathway.Protein kinase
VIT_08s0007g01510	Phosphatidic acid phosphatase / PAP2	Cluster 1; R_up_day	Cluster 1; R_up_night	Metabolism.Primary metabolism.Lipid metabolism.Glycerolipid metabolism.Glycerophospholipid metabolism	Metabolism.Primary metabolism.Lipid metabolism.Ether lipid metabolism	Metabolism.Primary metabolism.Lipid metabolism.Sphingolipid metabolism
VIT_08s0007g02040	No hit	Cluster 1; R_up_day	Cluster 1; R_up_night	No hit
VIT_08s0007g02070	No hit	Cluster 1; R_up_day	Cluster 1; R_up_night	No hit
VIT_08s0007g02230	Brittle-1	Cluster 1; R_up_day	Cluster 1; R_up_night	Transport overview.Electrochemical Potential-driven Transporters.Porters.Mitochondrial Carrier	Transport overview.Mitochondrial membrane transport
VIT_08s0007g02570	CCR4-NOT transcription complex subunit 7	Cluster 1; R_up_day	Cluster 1; R_up_night	Regulation overview.Regulation of gene expression.Regulation of transcription.Transcription factor.OFP	Metabolism.Primary metabolism.Nucleobase, nucleoside, nucleotide, nucleic acid metabolism.Nucleic acid metabolism.RNA metabolism.RNA catabolism
VIT_08s0007g02860	RNA-binding protein	Cluster 1; R_up_day	Cluster 1; R_up_night	Unknown
VIT_08s0007g03010	Hydrolase	Cluster 1; R_up_day	Cluster 1; R_up_night	Unknown
VIT_08s0007g03300	Unknown protein	Cluster 1; R_up_day	Cluster 1; R_up_night	Unknown
VIT_08s0007g03330	Iron-sulfur assembly protein IscA 2	Cluster 1; R_up_day	Cluster 1; R_up_night	Unclassified
VIT_08s0007g03470	Farnesylated-proteins converting enzyme-2	Cluster 1; R_up_day	Cluster 1; R_up_night	Metabolism.Primary metabolism.Protein metabolism and modification.Proteolysis.Peptidase-mediated proteolysis
VIT_08s0007g03560	Anthocyanin membrane protein 1 (Anm1)	Cluster 1; R_up_day	Cluster 1; R_up_night	Transport overview.Electrochemical Potential-driven Transporters.Porters.Drug/Metabolite Transporter.Thiamine Pyrophosphate Transporter
VIT_08s0007g03640	BZIP transcription factor	Cluster 1; R_up_day	Cluster 1; R_up_night	Regulation overview.Regulation of gene expression.Regulation of transcription.Transcription factor.bZIP family transcription factor
VIT_08s0007g03690	Inosine-uridine preferring nucleoside hydrolase family protein	Cluster 1; R_up_day	Cluster 1; R_up_night	Metabolism.Primary metabolism.Nucleobase, nucleoside, nucleotide, nucleic acid metabolism.Nucleotide metabolism.Purine metabolism	Metabolism.Primary metabolism.Coenzyme and prosthetic group metabolism.Nicotinate and nicotinamide metabolism
VIT_08s0007g03870	Phytosulfokines PSK1	Cluster 1; R_up_day	Cluster 1; R_up_night	Signaling.Signaling pathway.Signaling molecules.Signaling peptide.Ligand peptide
VIT_08s0007g03900	Heat stress transcription factor A3	Cluster 1; R_up_day	Cluster 1; R_up_night	Metabolism.Primary metabolism.Protein metabolism and modification.Protein folding.Chaperone-mediated protein folding.HSP-mediated protein folding	Regulation overview.Regulation of gene expression.Regulation of transcription.Transcription factor.HSF family transcription factor	Response to stimulus.Stress response.Abiotic stress response.Temperature stress response
VIT_08s0007g04000	Unknown protein	Cluster 1; R_up_day	Cluster 1; R_up_night	Unknown
VIT_08s0007g04190	ATPP2-A15	Cluster 1; R_up_day	Cluster 1; R_up_night	Unclassified
VIT_08s0007g04370	Unknown protein	Cluster 1; R_up_day	Cluster 1; R_up_night	Unknown
VIT_08s0007g04850	Protein phosphatase 2 (formerly 2A)	Cluster 1; R_up_day	Cluster 1; R_up_night	Signaling.Signaling pathway.Calcium sensors and Signaling	Metabolism.Primary metabolism.Nucleobase, nucleoside, nucleotide, nucleic acid metabolism.Nucleic acid metabolism.RNA metabolism.RNA catabolism.RNA surveillance
VIT_08s0007g04860	Nodulin family protein	Cluster 1; R_up_day	Cluster 1; R_up_night	Metabolism.Primary metabolism.Protein metabolism and modification.Protein modification.Protein myristoylation	Metabolism.Cellular metabolism.Nitrogen and sulfur metabolism.Nitrogen metabolism.Nitrogen assimilation
VIT_08s0007g05050	4-coumarate--CoA ligase	Cluster 1; R_up_day	Cluster 1; R_up_night	Metabolism.Secondary metabolism.Phenylpropanoid metabolism.Phenylpropanoid biosynthesis	Transport overview.Group translocators.Acyl CoA ligase-coupled transporters.Proposed Fatty Acid Transporter
VIT_08s0007g05150	Cysteine proteinase A494	Cluster 1; R_up_day	Cluster 1; R_up_night	Metabolism.Primary metabolism.Protein metabolism and modification.Proteolysis.Peptidase-mediated proteolysis
VIT_08s0007g05370	Strictosidine synthase	Cluster 1; R_up_day	Cluster 1; R_up_night	Metabolism.Secondary metabolism.Terpenoid metabolism.Terpenoid biosynthesis	Metabolism.Secondary metabolism.Terpenoid metabolism.Monoterpenoid metabolism.Monoterpenoid biosynthesis	Metabolism.Secondary metabolism.Primary amino acids derivated metabolism.Alkaloid metabolism.Alkaloid biosynthesis.Monoterpenoid indole alkaloid metabolism.Monoterpenoid indole alkaloid biosynthesis
VIT_08s0007g05440	Cation exchanger (CAX10)	Cluster 1; R_up_day	Cluster 1; R_up_night	Transport overview.Electrochemical Potential-driven Transporters.Porters.Ca2+:Cation Antiporter	Transport overview.Ion transport.Cation transport
VIT_08s0007g05580	Embryo-abundant protein	Cluster 1; R_up_day	Cluster 1; R_up_night	Unknown
VIT_08s0007g05680	No hit	Cluster 1; R_up_day	Cluster 1; R_up_night	No hit
VIT_08s0007g05760	No hit	Cluster 1; R_up_day	Cluster 1; R_up_night	No hit
VIT_08s0007g05940	Unknown	Cluster 1; R_up_day	Cluster 1; R_up_night	Unknown
VIT_08s0007g06030	Beta 1-3 glucanase [Vitis vinifera]	Cluster 1; R_up_day	Cluster 1; R_up_night	Metabolism.Primary metabolism.Carbohydrate metabolism.Polysaccharide metabolism.Beta-1,3 glucan metabolism.Beta-1,3 glucan catabolism
VIT_08s0007g06140	Anthranilate phosphoribosyltransferase	Cluster 1; R_up_day	Cluster 1; R_up_night	Metabolism.Primary metabolism.Amino acid metabolism.Aromatic amino acid metabolism.Aromatic amino acid biosynthesis	Metabolism.Primary metabolism.Amino acid metabolism.Amino acid biosynthesis	Metabolism.Primary metabolism.Amino acid metabolism.Aromatic amino acid metabolism.Tryptophan metabolism.Tryptophan biosynthesis
VIT_08s0007g06440	No hit	Cluster 1; R_up_day	Cluster 1; R_up_night	No hit
VIT_08s0007g06530	DnaJ homolog	Cluster 1; R_up_day	Cluster 1; R_up_night	Transport overview.Primary Active Transporters.P-P-bond hydrolysis-driven transporters.General Secretory Pathway (Sec)	Metabolism.Primary metabolism.Protein metabolism and modification.Protein folding.Chaperone-mediated protein folding.HSP-mediated protein folding.HSP-mediated protein folding co-chaperone
VIT_08s0007g06620	DC1 domain-containing protein	Cluster 1; R_up_day	Cluster 1; R_up_night	Unknown
VIT_08s0007g06850	Colon cancer-associated protein Mic1 containing protein	Cluster 1; R_up_day	Cluster 1; R_up_night	Unknown
VIT_08s0007g07050	Unknown protein	Cluster 1; R_up_day	Cluster 1; R_up_night	Unknown
VIT_08s0007g07310	No hit	Cluster 1; R_up_day	Cluster 1; R_up_night	No hit
VIT_08s0007g07430	Galactose-1-phosphate uridyl transferase	Cluster 1; R_up_day	Cluster 1; R_up_night	Metabolism.Primary metabolism.Carbohydrate metabolism.Monosaccharide metabolism.Galactose metabolism	Metabolism.Primary metabolism.Carbohydrate metabolism.Monosaccharide metabolism.Nucleotide sugar metabolism
VIT_08s0007g08010	No hit	Cluster 1; R_up_day	Cluster 1; R_up_night	No hit
VIT_08s0007g08040	No hit	Cluster 1; R_up_day	Cluster 1; R_up_night	No hit
VIT_08s0007g08240	Unknown	Cluster 1; R_up_day	Cluster 1; R_up_night	Unknown
VIT_08s0007g08360	Zf AN1 and C2H2 domain-containing stress-associated protein 11	Cluster 1; R_up_day	Cluster 1; R_up_night	Regulation overview.Regulation of gene expression.Regulation of transcription.Transcription factor.C2H2 family transcription factor
VIT_08s0007g08700	DTW domain-containing protein	Cluster 1; R_up_day	Cluster 1; R_up_night	Unknown
VIT_08s0007g08830	Polcalcin	Cluster 1; R_up_day	Cluster 1; R_up_night	Response to stimulus.Stress response.Biotic stress response.Plant-pathogen interaction
VIT_08s0007g08850	No hit	Cluster 1; R_up_day	Cluster 1; R_up_night	No hit
VIT_08s0032g00040	Carboxyesterase 16	Cluster 1; R_up_day	Cluster 1; R_up_night	Metabolism.Cellular metabolism.Esterase activity
VIT_08s0032g00240	CYP71A22	Cluster 1; R_up_day	Cluster 1; R_up_night	Metabolism.Secondary metabolism.Terpenoid metabolism.Monoterpenoid metabolism.Monoterpenoid biosynthesis	Metabolism.Secondary metabolism.Primary amino acids derivated metabolism.Alkaloid metabolism.Alkaloid biosynthesis.Monoterpenoid indole alkaloid metabolism.Monoterpenoid indole alkaloid biosynthesis
VIT_08s0032g00410	Myosin-like protein XIK	Cluster 1; R_up_day	Cluster 1; R_up_night	Cellular process.Cellular component organization and biogenesis.Cytoskeleton organization and biogenesis.Actin organization and biogenesis.Actin-driven movement
VIT_08s0032g00460	No hit	Cluster 1; R_up_day	Cluster 1; R_up_night	No hit
VIT_08s0032g00520	Transmembrane protein 9	Cluster 1; R_up_day	Cluster 1; R_up_night	Unknown
VIT_08s0032g00790	ABC transporter G member 4	Cluster 1; R_up_day	Cluster 1; R_up_night	Transport overview.Macromolecule transport.Multidrug transport.Multidrug ABC transport
VIT_08s0032g00840	Sucrose-phosphatase.	Cluster 1; R_up_day	Cluster 1; R_up_night	Metabolism.Primary metabolism.Carbohydrate metabolism.Polysaccharide metabolism.Starch and sucrose metabolism.Sucrose biosynthesis
VIT_08s0032g00870	No hit	Cluster 1; R_up_day	Cluster 1; R_up_night	No hit
VIT_08s0032g00940	DnaJ homolog	Cluster 1; R_up_day	Cluster 1; R_up_night	Transport overview.Primary Active Transporters.P-P-bond hydrolysis-driven transporters.General Secretory Pathway (Sec)	Metabolism.Primary metabolism.Protein metabolism and modification.Protein folding.Chaperone-mediated protein folding.HSP-mediated protein folding.HSP-mediated protein folding co-chaperone
VIT_08s0032g00960	Chaperone binding	Cluster 1; R_up_day	Cluster 1; R_up_night	Metabolism.Primary metabolism.Protein metabolism and modification.Protein folding.Chaperone-mediated protein folding.Chaperonin
VIT_08s0032g01100	Acyl-CoA oxidase ACX6	Cluster 1; R_up_day	Cluster 1; R_up_night	Metabolism.Primary metabolism.Lipid metabolism.Fatty acid metabolism.Alpha-linolenic acid metabolism	Metabolism.Primary metabolism.Lipid metabolism.Fatty acid metabolism.Fatty acid biosynthesis.Unsaturated fatty acid biosynthesis	Cellular process.Cellular component organization and biogenesis.Organelle organization and biogenesis.Peroxisome organization and biogenesis
VIT_08s0032g01150	Syntaxin 1B/2/3/4	Cluster 1; R_up_day	Cluster 1; R_up_night	Cellular process.Cellular transport.Protein trafficking.Vesicle-mediated trafficking.SNARE interactions in vesicular transport	Transport overview.Channels and pores.Vesicle Fusion Pores.Synaptosomal Vesicle Fusion Pore
VIT_08s0040g00050	Unknown protein	Cluster 1; R_up_day	Cluster 1; R_up_night	Unknown
VIT_08s0040g00230	Exportin 7	Cluster 1; R_up_day	Cluster 1; R_up_night	Transport overview.Nucleocytoplasmic transport.Nuclear pore complex
VIT_08s0040g00680	Phosphatidylinositol 4-kinase type-II	Cluster 1; R_up_day	Cluster 1; R_up_night	Metabolism.Primary metabolism.Carbohydrate metabolism.Monosaccharide metabolism.Inositol phosphate metabolism	Signaling.Signaling pathway.Phosphatidylinositol Signaling	Signaling.Signaling pathway.Protein kinase
VIT_08s0040g01060	Serine carboxypeptidase S10	Cluster 1; R_up_day	Cluster 1; R_up_night	Metabolism.Primary metabolism.Protein metabolism and modification.Proteolysis.Peptidase-mediated proteolysis
VIT_08s0040g01110	Serine carboxypeptidase II	Cluster 1; R_up_day	Cluster 1; R_up_night	Metabolism.Primary metabolism.Protein metabolism and modification.Proteolysis.Peptidase-mediated proteolysis
VIT_08s0040g01270	Dual specificity protein phosphatase	Cluster 1; R_up_day	Cluster 1; R_up_night	Signaling.Signaling pathway.Calcium sensors and Signaling	Signaling.Signaling pathway.Protein phosphatase
VIT_08s0040g01390	Auxin-responsive family protein	Cluster 1; R_up_day	Cluster 1; R_up_night	Signaling.Hormone Signaling.Auxin Signaling.Auxin-mediated Signaling pathway
VIT_08s0040g01720	No hit	Cluster 1; R_up_day	Cluster 1; R_up_night	No hit
VIT_08s0040g01770	Cyclic nucleotide-gated ion channel 15	Cluster 1; R_up_day	Cluster 1; R_up_night	Response to stimulus.Stress response.Biotic stress response.Plant-pathogen interaction	Transport overview.Channels and pores.a-Type channels.The Voltage-gated Ion Channel.Cyclic nucleotide-gated nonselective cation channel
VIT_08s0040g01840	No hit	Cluster 1; R_up_day	Cluster 1; R_up_night	No hit
VIT_08s0040g02090	DnaJ homolog	Cluster 1; R_up_day	Cluster 1; R_up_night	Transport overview.Primary Active Transporters.P-P-bond hydrolysis-driven transporters.General Secretory Pathway (Sec)	Metabolism.Primary metabolism.Protein metabolism and modification.Protein folding.Chaperone-mediated protein folding.HSP-mediated protein folding.HSP-mediated protein folding co-chaperone
VIT_08s0040g02130	Syntaxin of plants SYP7	Cluster 1; R_up_day	Cluster 1; R_up_night	Cellular process.Cellular transport.Protein trafficking.Vesicle-mediated trafficking.SNARE interactions in vesicular transport
VIT_08s0040g02260	Protamine P1	Cluster 1; R_up_day	Cluster 1; R_up_night	Cellular process.Cellular component organization and biogenesis.Nucleus.Chromosome organization and biogenesis.Chromatin organization
VIT_08s0040g02280	Phosphatidic acid phosphatase / PAP2	Cluster 1; R_up_day	Cluster 1; R_up_night	Metabolism.Primary metabolism.Lipid metabolism.Glycerolipid metabolism.Glycerophospholipid metabolism	Metabolism.Primary metabolism.Lipid metabolism.Ether lipid metabolism	Metabolism.Primary metabolism.Lipid metabolism.Sphingolipid metabolism
VIT_08s0040g02440	PWWP domain-containing protein	Cluster 1; R_up_day	Cluster 1; R_up_night	Unknown
VIT_08s0040g02520	Inositol-1	Cluster 1; R_up_day	Cluster 1; R_up_night	Metabolism.Primary metabolism.Carbohydrate metabolism.Monosaccharide metabolism.Inositol phosphate metabolism	Signaling.Signaling pathway.Phosphatidylinositol Signaling
VIT_08s0040g02530	No hit	Cluster 1; R_up_day	Cluster 1; R_up_night	No hit
VIT_08s0040g02610	Unknown	Cluster 1; R_up_day	Cluster 1; R_up_night	Unknown
VIT_08s0040g03330	RNA-binding protein	Cluster 1; R_up_day	Cluster 1; R_up_night	Unknown
VIT_08s0056g00040	WD-40 repeat protein	Cluster 1; R_up_day	Cluster 1; R_up_night	Unknown
VIT_08s0056g00120	Ethanolamine-phosphate cytidylyltransferase	Cluster 1; R_up_day	Cluster 1; R_up_night	Metabolism.Primary metabolism.Lipid metabolism.Glycerolipid metabolism.Glycerophospholipid metabolism
VIT_08s0056g00180	Translation initiation factor IF-2B subunit delta	Cluster 1; R_up_day	Cluster 1; R_up_night	Metabolism.Primary metabolism.Protein metabolism and modification.Protein synthesis.Translation.Translational initiation
VIT_08s0056g00280	Plant adhesion molecule 1 (PAM1)	Cluster 1; R_up_day	Cluster 1; R_up_night	Signaling.Signaling pathway.G-protein signaling pathway.RAB-GTPase regulation
VIT_08s0056g00290	Calcium-binding protein CML	Cluster 1; R_up_day	Cluster 1; R_up_night	Response to stimulus.Stress response.Biotic stress response.Plant-pathogen interaction
VIT_08s0056g00300	Unknown	Cluster 1; R_up_day	Cluster 1; R_up_night	Unknown
VIT_08s0056g00430	Unknown protein	Cluster 1; R_up_day	Cluster 1; R_up_night	Unknown
VIT_08s0056g00450	No hit	Cluster 1; R_up_day	Cluster 1; R_up_night	No hit
VIT_08s0056g00740	Unknown protein	Cluster 1; R_up_day	Cluster 1; R_up_night	Unknown
VIT_08s0056g01090	5'-3' exoribonuclease 2	Cluster 1; R_up_day	Cluster 1; R_up_night	Metabolism.Primary metabolism.Nucleobase, nucleoside, nucleotide, nucleic acid metabolism.Nucleic acid metabolism.RNA metabolism.RNA catabolism	Cellular process.Cellular component organization and biogenesis.Ribosome organization and biogenesis
VIT_08s0056g01170	Zinc finger protein VAR3	Cluster 1; R_up_day	Cluster 1; R_up_night	Regulation overview.Regulation of gene expression.Regulation of transcription.Transcription factor.Other zinc finger family transcription factor
VIT_08s0056g01240	No hit	Cluster 1; R_up_day	Cluster 1; R_up_night	No hit
VIT_08s0056g01610	No hit	Cluster 1; R_up_day	Cluster 1; R_up_night	No hit
VIT_08s0058g00040	Verticillium wilt disease resistance protein Ve2	Cluster 1; R_up_day	Cluster 1; R_up_night	Response to stimulus.Stress response.Biotic stress response
VIT_08s0058g00120	Phosphatidylethanolamine-binding	Cluster 1; R_up_day	Cluster 1; R_up_night	Unknown
VIT_08s0058g00140	Ammonium transporter 2	Cluster 1; R_up_day	Cluster 1; R_up_night	Transport overview.Channels and pores.a-Type channels.Ammonia Channel Transporter	Metabolism.Cellular metabolism.Nitrogen and sulfur metabolism.Nitrogen metabolism.Nitrogen assimilation	Transport overview.Ion transport.Cation transport.Ammonium transport
VIT_08s0058g00210	Chaperone	Cluster 1; R_up_day	Cluster 1; R_up_night	Metabolism.Primary metabolism.Protein metabolism and modification.Protein folding.Chaperone-mediated protein folding
VIT_08s0058g00340	Unknown protein	Cluster 1; R_up_day	Cluster 1; R_up_night	Unknown
VIT_08s0058g00430	ferritin	Cluster 1; R_up_day	Cluster 1; R_up_night	Metabolism.Primary metabolism.Cofactor metabolism.Tetrapyrrole metabolism
VIT_08s0058g00630	DNA-directed RNA polymerase II subunit A	Cluster 1; R_up_day	Cluster 1; R_up_night	Metabolism.Primary metabolism.Nucleobase, nucleoside, nucleotide, nucleic acid metabolism.Nucleic acid metabolism.RNA metabolism.RNA polymerase	Metabolism.Primary metabolism.Nucleobase, nucleoside, nucleotide, nucleic acid metabolism.Nucleic acid metabolism.RNA metabolism.RNA biosynthesis
VIT_08s0058g00840	U4/U6 small nuclear ribonucleoprotein PRP4	Cluster 1; R_up_day	Cluster 1; R_up_night	Metabolism.Primary metabolism.Nucleobase, nucleoside, nucleotide, nucleic acid metabolism.Nucleic acid metabolism.RNA metabolism.RNA processing.mRNA processing.mRNA splicing	Metabolism.Primary metabolism.Protein metabolism and modification.Protein folding
VIT_08s0058g01000	Aspartate aminotransferase	Cluster 1; R_up_day	Cluster 1; R_up_night	Metabolism.Primary metabolism.Amino acid metabolism.Alanine and aspartate metabolism	Metabolism.Primary metabolism.Amino acid metabolism.Cysteine metabolism	Metabolism.Primary metabolism.Amino acid metabolism.Arginine and proline metabolism	Metabolism.Primary metabolism.Amino acid metabolism.Aromatic amino acid metabolism.Tyrosine metabolism	Metabolism.Primary metabolism.Amino acid metabolism.Aromatic amino acid metabolism.Phenylalanine metabolism.Phenylalanine biosynthesis	Metabolism.Primary metabolism.Amino acid metabolism.Aromatic amino acid metabolism.Aromatic amino acid biosynthesis	Metabolism.Primary metabolism.Carbon fixation	Metabolism.Secondary metabolism.Primary amino acids derivated metabolism.Alkaloid metabolism
VIT_08s0058g01120	Unknown	Cluster 1; R_up_day	Cluster 1; R_up_night	Unknown
VIT_08s0058g01130	WNK5 (Arabidopsis WNK kinase 5)	Cluster 1; R_up_day	Cluster 1; R_up_night	Development.Reproductive development.Flower development	Signaling.Signaling pathway.Circadian clock Signaling	Signaling.Signaling pathway.Protein kinase
VIT_08s0058g01410	Transcription factor S-II (TFIIS)	Cluster 1; R_up_day	Cluster 1; R_up_night	Metabolism.Primary metabolism.Nucleobase, nucleoside, nucleotide, nucleic acid metabolism.Nucleic acid metabolism.RNA metabolism.Basal transcription factors	Metabolism.Primary metabolism.Nucleobase, nucleoside, nucleotide, nucleic acid metabolism.Nucleic acid metabolism.RNA metabolism.RNA biosynthesis
VIT_08s0058g01460		Cluster 1; R_up_day	Cluster 1; R_up_night	Metabolism.Primary metabolism.Carbohydrate metabolism.Monosaccharide metabolism.Fructose and mannose metabolism
VIT_08s0058g01480		Cluster 1; R_up_day	Cluster 1; R_up_night	Metabolism.Primary metabolism.Carbohydrate metabolism.Monosaccharide metabolism.Fructose and mannose metabolism
VIT_08s0105g00120	No hit	Cluster 1; R_up_day	Cluster 1; R_up_night	No hit
VIT_08s0105g00160	No hit	Cluster 1; R_up_day	Cluster 1; R_up_night	No hit
VIT_08s0105g00200	U-box domain-containing protein	Cluster 1; R_up_day	Cluster 1; R_up_night	Unknown
VIT_08s0105g00370	Myb family	Cluster 1; R_up_day	Cluster 1; R_up_night	Regulation overview.Regulation of gene expression.Regulation of transcription.Transcription factor.G2-like family transcription factor
VIT_08s0105g00400	GT-1-like transcription factor	Cluster 1; R_up_day	Cluster 1; R_up_night	Regulation overview.Regulation of gene expression.Regulation of transcription.Transcription factor.Trihelix family transcription factor
VIT_08s0105g00450	Transducin protein	Cluster 1; R_up_day	Cluster 1; R_up_night	Unclear
VIT_09s0002g00160	Histone H2A.4 HTA12	Cluster 1; R_up_day	Cluster 1; R_up_night	Cellular process.Cellular component organization and biogenesis.Nucleus.Chromosome organization and biogenesis.Chromatin assembly
VIT_09s0002g00190	NBS-LRR type disease resistance protein	Cluster 1; R_up_day	Cluster 1; R_up_night	Diverse functions.Gene family with diverse functions.NBS-LRR superfamily	Response to stimulus.Stress response.Biotic stress response
VIT_09s0002g00250	Disease resistance protein (NBS-LRR class)	Cluster 1; R_up_day	Cluster 1; R_up_night	Diverse functions.Gene family with diverse functions.NBS-LRR superfamily	Response to stimulus.Stress response.Biotic stress response
VIT_09s0002g00460	WD-40 repeat family protein / beige-related	Cluster 1; R_up_day	Cluster 1; R_up_night	Unknown
VIT_09s0002g00510	Lipase GDSL 1	Cluster 1; R_up_day	Cluster 1; R_up_night	Unclear
VIT_09s0002g00730	No hit	Cluster 1; R_up_day	Cluster 1; R_up_night	No hit
VIT_09s0002g01100	DAG	Cluster 1; R_up_day	Cluster 1; R_up_night	Cellular process.Cellular component organization and biogenesis.Organelle organization and biogenesis.Plastid organization and biogenesis
VIT_09s0002g01190	Scarecrow transcription factor 29 (SCL29)	Cluster 1; R_up_day	Cluster 1; R_up_night	Regulation overview.Regulation of gene expression.Regulation of transcription.Transcription factor.GRAS family transcription factor
VIT_09s0002g01320	Germin-like protein	Cluster 1; R_up_day	Cluster 1; R_up_night	Metabolism.Primary metabolism.Generation of metabolite precursors and energy.Storage proteins
VIT_09s0002g01700	Epidermal patterning factor-like protein 3	Cluster 1; R_up_day	Cluster 1; R_up_night	Unknown
VIT_09s0002g01860	DNA-directed RNA polymerase	Cluster 1; R_up_day	Cluster 1; R_up_night	Metabolism.Primary metabolism.Nucleobase, nucleoside, nucleotide, nucleic acid metabolism.Nucleic acid metabolism.RNA metabolism
VIT_09s0002g01870	Unknown protein	Cluster 1; R_up_day	Cluster 1; R_up_night	Unknown
VIT_09s0002g01890	Hydroxyproline-rich glycoprotein	Cluster 1; R_up_day	Cluster 1; R_up_night	Cellular process.Cellular component organization and biogenesis.Cell wall organization and biogenesis.Cell wall structural protein
VIT_09s0002g02180	Tubulin beta-5 chain	Cluster 1; R_up_day	Cluster 1; R_up_night	Cellular process.Cellular component organization and biogenesis.Cytoskeleton organization and biogenesis.Microtubule organization and biogenesis	Cellular process.Cellular transport.Protein trafficking.Vesicle-mediated trafficking.Phagosome
VIT_09s0002g02570	No hit	Cluster 1; R_up_day	Cluster 1; R_up_night	No hit
VIT_09s0002g02830	Light repressible receptor protein kinase	Cluster 1; R_up_day	Cluster 1; R_up_night	Signaling.Signaling pathway.Protein kinase
VIT_09s0002g02890	FRK1 (FLG22-induced receptor-like kinase 1)	Cluster 1; R_up_day	Cluster 1; R_up_night	Response to stimulus.Stress response.Biotic stress response.Plant-pathogen interaction	Signaling.Signaling pathway.Protein kinase
VIT_09s0002g02900	Leucine-rich repeat protein kinase	Cluster 1; R_up_day	Cluster 1; R_up_night	Signaling.Signaling pathway.Protein kinase
VIT_09s0002g02970	Unknown	Cluster 1; R_up_day	Cluster 1; R_up_night	Unknown
VIT_09s0002g03000	Leucine-rich repeat protein kinase	Cluster 1; R_up_day	Cluster 1; R_up_night	Signaling.Signaling pathway.Protein kinase
VIT_09s0002g03440	Protein kinase	Cluster 1; R_up_day	Cluster 1; R_up_night	Signaling.Signaling pathway.Protein kinase
VIT_09s0002g03690	Avr9/Cf-9 rapidly elicited protein 146	Cluster 1; R_up_day	Cluster 1; R_up_night	Response to stimulus.Stress response.Biotic stress response
VIT_09s0002g04160	Thioesterase family	Cluster 1; R_up_day	Cluster 1; R_up_night	Unclear
VIT_09s0002g04590	Unknown protein	Cluster 1; R_up_day	Cluster 1; R_up_night	Unknown
VIT_09s0002g04620	Unknown protein	Cluster 1; R_up_day	Cluster 1; R_up_night	Unknown
VIT_09s0002g04720	Coatomer protein complex	Cluster 1; R_up_day	Cluster 1; R_up_night	Transport overview.Macromolecule transport.Protein transport.Protein coat	Cellular process.Cellular transport.Protein trafficking.Vesicle-mediated trafficking
VIT_09s0002g05020	No hit	Cluster 1; R_up_day	Cluster 1; R_up_night	No hit
VIT_09s0002g05150	IAA19	Cluster 1; R_up_day	Cluster 1; R_up_night	Signaling.Hormone Signaling.Auxin Signaling.Auxin-mediated Signaling pathway	Regulation overview.Regulation of gene expression.Regulation of transcription.Transcription factor.AUXIAA family transcription factor
VIT_09s0002g05250	Aminotransferase class I and II	Cluster 1; R_up_day	Cluster 1; R_up_night	Metabolism.Primary metabolism.Amino acid metabolism.Alanine and aspartate metabolism	Metabolism.Primary metabolism.Amino acid metabolism.Cysteine metabolism	Metabolism.Primary metabolism.Amino acid metabolism.Arginine and proline metabolism	Metabolism.Primary metabolism.Amino acid metabolism.Aromatic amino acid metabolism.Tyrosine metabolism	Metabolism.Primary metabolism.Amino acid metabolism.Aromatic amino acid metabolism.Phenylalanine metabolism.Phenylalanine biosynthesis	Metabolism.Primary metabolism.Amino acid metabolism.Aromatic amino acid metabolism.Aromatic amino acid biosynthesis	Metabolism.Primary metabolism.Carbon fixation	Metabolism.Secondary metabolism.Primary amino acids derivated metabolism.Alkaloid metabolism
VIT_09s0002g05360	ABC transporter g family pleiotropic drug resistance 12 PDR12	Cluster 1; R_up_day	Cluster 1; R_up_night	Transport overview.Macromolecule transport.Multidrug transport.Multidrug ABC transport
VIT_09s0002g05370	ABC transporter g family pleiotropic drug resistance 12 PDR12	Cluster 1; R_up_day	Cluster 1; R_up_night	Transport overview.Macromolecule transport.Multidrug transport.Multidrug ABC transport
VIT_09s0002g05390	ABC transporter g family pleiotropic drug resistance 12 PDR12	Cluster 1; R_up_day	Cluster 1; R_up_night	Transport overview.Macromolecule transport.Multidrug transport.Multidrug ABC transport
VIT_09s0002g05470	ABC transporter g family pleiotropic drug resistance 12 PDR12	Cluster 1; R_up_day	Cluster 1; R_up_night	Transport overview.Macromolecule transport.Multidrug transport.Multidrug ABC transport
VIT_09s0002g05490	ABC transporter g family pleiotropic drug resistance 12 PDR12	Cluster 1; R_up_day	Cluster 1; R_up_night	Transport overview.Macromolecule transport.Multidrug transport.Multidrug ABC transport
VIT_09s0002g05560	ABC transporter g family pleiotropic drug resistance 12 PDR12	Cluster 1; R_up_day	Cluster 1; R_up_night	Transport overview.Macromolecule transport.Multidrug transport.Multidrug ABC transport
VIT_09s0002g05570	ABC transporter g family pleiotropic drug resistance 12 PDR12	Cluster 1; R_up_day	Cluster 1; R_up_night	Transport overview.Macromolecule transport.Multidrug transport.Multidrug ABC transport
VIT_09s0002g05590	ABC transporter g family pleiotropic drug resistance 12 PDR12	Cluster 1; R_up_day	Cluster 1; R_up_night	Transport overview.Macromolecule transport.Multidrug transport.Multidrug ABC transport
VIT_09s0002g05610	Unknown	Cluster 1; R_up_day	Cluster 1; R_up_night	Unknown
VIT_09s0002g06230	RPS5 (resistant to p. syringae 5)	Cluster 1; R_up_day	Cluster 1; R_up_night	Response to stimulus.Stress response.Biotic stress response.Plant-pathogen interaction.R proteins from Plant-pathogen interaction	Diverse functions.Gene family with diverse functions.NBS-LRR superfamily
VIT_09s0002g06400	No hit	Cluster 1; R_up_day	Cluster 1; R_up_night	No hit
VIT_09s0002g06500	Glycosyl hydrolase family 17 protein	Cluster 1; R_up_day	Cluster 1; R_up_night	Metabolism.Primary metabolism.Carbohydrate metabolism.Carbohydrate catabolism
VIT_09s0002g06840	Barwin endoglucanase	Cluster 1; R_up_day	Cluster 1; R_up_night	Response to stimulus.Stress response.Biotic stress response
VIT_09s0002g06860	Barwin endoglucanase	Cluster 1; R_up_day	Cluster 1; R_up_night	Response to stimulus.Stress response.Biotic stress response
VIT_09s0002g06900	NtEIG-A1	Cluster 1; R_up_day	Cluster 1; R_up_night	Response to stimulus.Stress response.Biotic stress response
VIT_09s0002g06910	DNA polymerase V	Cluster 1; R_up_day	Cluster 1; R_up_night	Metabolism.Primary metabolism.Nucleobase, nucleoside, nucleotide, nucleic acid metabolism.Nucleic acid metabolism.DNA metabolism.DNA replication
VIT_09s0002g06940	ABC transporter g family pleiotropic drug resistance 12 PDR12	Cluster 1; R_up_day	Cluster 1; R_up_night	Transport overview.Macromolecule transport.Multidrug transport.Multidrug ABC transport
VIT_09s0002g06950	ABC transporter g family pleiotropic drug resistance 12 PDR12	Cluster 1; R_up_day	Cluster 1; R_up_night	Transport overview.Macromolecule transport.Multidrug transport.Multidrug ABC transport
VIT_09s0002g07110	KEG (keep on going)	Cluster 1; R_up_day	Cluster 1; R_up_night	Signaling.Hormone Signaling.ABA Signaling.ABA-mediated Signaling pathway
VIT_09s0002g07580	NADPH quinone oxidoreductase-like protein	Cluster 1; R_up_day	Cluster 1; R_up_night	Metabolism.Primary metabolism.Coenzyme and prosthetic group metabolism.Riboflavin metabolism	Metabolism.Cellular metabolism.Oxidation reduction
VIT_09s0002g07640	Glycerol kinase	Cluster 1; R_up_day	Cluster 1; R_up_night	Metabolism.Primary metabolism.Lipid metabolism.Glycerolipid metabolism
VIT_09s0002g07740	Ubiquitin-conjugating enzyme E2 W	Cluster 1; R_up_day	Cluster 1; R_up_night	Metabolism.Primary metabolism.Protein metabolism and modification.Proteolysis.cytoplasmic and nuclear protein degradation.Ubiquitin-mediated proteolysis
VIT_09s0002g07760	NADPH quinone oxidoreductase	Cluster 1; R_up_day	Cluster 1; R_up_night	Metabolism.Primary metabolism.Coenzyme and prosthetic group metabolism.Riboflavin metabolism	Metabolism.Cellular metabolism.Oxidation reduction
VIT_09s0002g07860	Glycerol kinase	Cluster 1; R_up_day	Cluster 1; R_up_night	Metabolism.Primary metabolism.Lipid metabolism.Glycerolipid metabolism
VIT_09s0002g08050	Unknown protein	Cluster 1; R_up_day	Cluster 1; R_up_night	Unknown
VIT_09s0002g08230	PTAC17 (plastid transcriptionally active17)	Cluster 1; R_up_day	Cluster 1; R_up_night	Cellular process.Cellular component organization and biogenesis.Organelle organization and biogenesis.Plastid organization and biogenesis
VIT_09s0002g08600	No hit	Cluster 1; R_up_day	Cluster 1; R_up_night	No hit
VIT_09s0002g08640	Protein kinase Xa21	Cluster 1; R_up_day	Cluster 1; R_up_night	Response to stimulus.Stress response.Biotic stress response.Plant-pathogen interaction	Signaling.Signaling pathway.Protein kinase
VIT_09s0002g08660	F-box protein (FBL14)	Cluster 1; R_up_day	Cluster 1; R_up_night	Metabolism.Primary metabolism.Protein metabolism and modification.Proteolysis.cytoplasmic and nuclear protein degradation.Ubiquitin-mediated proteolysis
VIT_09s0002g08760	Ankyrin	Cluster 1; R_up_day	Cluster 1; R_up_night	Diverse functions.Gene family with diverse functions.Ankyrin domain family
VIT_09s0002g08870	F-box/kelch-repeat protein	Cluster 1; R_up_day	Cluster 1; R_up_night	Metabolism.Primary metabolism.Protein metabolism and modification.Proteolysis.cytoplasmic and nuclear protein degradation.Ubiquitin-mediated proteolysis
VIT_09s0002g09000	No hit	Cluster 1; R_up_day	Cluster 1; R_up_night	No hit
VIT_09s0002g09100	No hit	Cluster 1; R_up_day	Cluster 1; R_up_night	No hit
VIT_09s0002g09120	Ethylene-responsive transcription factor ERF003	Cluster 1; R_up_day	Cluster 1; R_up_night	Signaling.Hormone Signaling.Ethylene Signaling.Ethylene-mediated Signaling pathway	Regulation overview.Regulation of gene expression.Regulation of transcription.Transcription factor.AP2 family transcription factor.ERF subfamily transcription factor
VIT_09s0002g09140	Ethylene-responsive transcription factor ERF003	Cluster 1; R_up_day	Cluster 1; R_up_night	Signaling.Hormone Signaling.Ethylene Signaling.Ethylene-mediated Signaling pathway	Regulation overview.Regulation of gene expression.Regulation of transcription.Transcription factor.AP2 family transcription factor.ERF subfamily transcription factor
VIT_09s0002g09160	No hit	Cluster 1; R_up_day	Cluster 1; R_up_night	No hit
VIT_09s0018g00100	Pentatricopeptide repeat	Cluster 1; R_up_day	Cluster 1; R_up_night	Diverse functions.Gene family with diverse functions.Pentatricopeptide domain family
VIT_09s0018g00110	No hit	Cluster 1; R_up_day	Cluster 1; R_up_night	No hit
VIT_09s0018g00190	Glycerol kinase	Cluster 1; R_up_day	Cluster 1; R_up_night	Metabolism.Primary metabolism.Lipid metabolism.Glycerolipid metabolism
VIT_09s0018g00230	Phosphoglucomutase/phosphomannomutase C terminal	Cluster 1; R_up_day	Cluster 1; R_up_night	Metabolism.Primary metabolism.Carbohydrate metabolism.Glycolysis Gluconeogenesis	Metabolism.Primary metabolism.Carbohydrate metabolism.Monosaccharide metabolism.Monosaccharide catabolism.Pentose-phosphate shunt	Metabolism.Primary metabolism.Carbohydrate metabolism.Monosaccharide metabolism.Galactose metabolism	Metabolism.Primary metabolism.Carbohydrate metabolism.Polysaccharide metabolism.Starch and sucrose metabolism.Starch biosynthesis catabolism	Metabolism.Primary metabolism.Carbohydrate metabolism.Monosaccharide metabolism.Fructose and mannose metabolism	Metabolism.Primary metabolism.Organic acid metabolism.Ascorbate and aldarate metabolism
VIT_09s0018g00660	CTV.12	Cluster 1; R_up_day	Cluster 1; R_up_night	Unknown
VIT_09s0018g00730	CTV.12	Cluster 1; R_up_day	Cluster 1; R_up_night	Unknown
VIT_09s0018g00900	ABC transporter g family pleiotropic drug resistance 12 PDR12	Cluster 1; R_up_day	Cluster 1; R_up_night	Transport overview.Macromolecule transport.Multidrug transport.Multidrug ABC transport
VIT_09s0018g01020	Zinc finger and C2 domain protein	Cluster 1; R_up_day	Cluster 1; R_up_night	Unknown
VIT_09s0018g01050	Serine-threonine protein kinase	Cluster 1; R_up_day	Cluster 1; R_up_night	Signaling.Signaling pathway.Protein kinase
VIT_09s0018g01120	Zinc finger and C2 domain protein	Cluster 1; R_up_day	Cluster 1; R_up_night	Unknown
VIT_09s0018g01290	Unknown protein	Cluster 1; R_up_day	Cluster 1; R_up_night	Unknown
VIT_09s0018g01370	STE20/SPS1 proline-alanine-rich protein kinase	Cluster 1; R_up_day	Cluster 1; R_up_night	Signaling.Signaling pathway.Protein kinase
VIT_09s0018g01480	No hit	Cluster 1; R_up_day	Cluster 1; R_up_night	No hit
VIT_09s0018g01490	Anthraniloyal-CoA: methanol anthraniloyal transferase	Cluster 1; R_up_day	Cluster 1; R_up_night	Metabolism.Primary metabolism.Amino acid metabolism.Aromatic amino acid metabolism.Aromatic amino acid biosynthesis	Metabolism.Secondary metabolism.Aromatic compound metabolism.Aromatic compound biosynthesis
VIT_09s0018g01520	Disease resistance protein	Cluster 1; R_up_day	Cluster 1; R_up_night	Diverse functions.Gene family with diverse functions.NBS-LRR superfamily	Response to stimulus.Stress response.Biotic stress response
VIT_09s0018g01790	Integral membrane Yip1 family protein	Cluster 1; R_up_day	Cluster 1; R_up_night	Transport overview.Macromolecule transport.Protein transport.Protein coat	Cellular process.Cellular transport.Protein trafficking.Vesicle-mediated trafficking
VIT_09s0018g01820	MKK5	Cluster 1; R_up_day	Cluster 1; R_up_night	Response to stimulus.Stress response.Biotic stress response.Plant-pathogen interaction	Signaling.Signaling pathway.Protein kinase.MAPK cascade
VIT_09s0018g01910	Unknown	Cluster 1; R_up_day	Cluster 1; R_up_night	Unknown
VIT_09s0054g00160	Ceramidase	Cluster 1; R_up_day	Cluster 1; R_up_night	Metabolism.Primary metabolism.Lipid metabolism.Sphingolipid metabolism
VIT_09s0054g00250	No hit	Cluster 1; R_up_day	Cluster 1; R_up_night	No hit
VIT_09s0054g00330	Mannosyl-oligosaccharide 1	Cluster 1; R_up_day	Cluster 1; R_up_night	Metabolism.Primary metabolism.Carbohydrate metabolism.Oligosaccharide metabolism.N-Glycan metabolism.N-Glycan biosynthesis	Metabolism.Primary metabolism.Carbohydrate metabolism.Oligosaccharide metabolism.Glycan metabolism.Glycan structures-biosynthesis1	Metabolism.Primary metabolism.Protein metabolism and modification.Protein processing in endoplasmic reticulum
VIT_09s0054g00490	No hit	Cluster 1; R_up_day	Cluster 1; R_up_night	No hit
VIT_09s0054g00560	No hit	Cluster 1; R_up_day	Cluster 1; R_up_night	No hit
VIT_09s0054g00910	Chaperone BCS1 mitochondrial	Cluster 1; R_up_day	Cluster 1; R_up_night	Metabolism.Primary metabolism.Protein metabolism and modification.Protein folding.Chaperone-mediated protein folding
VIT_09s0054g01040	Unknown protein	Cluster 1; R_up_day	Cluster 1; R_up_night	Unknown
VIT_09s0054g01270	Receptor kinase ARK3	Cluster 1; R_up_day	Cluster 1; R_up_night	Signaling.Signaling pathway.Protein kinase
VIT_09s0054g01610	Synaptic vesicle 2-related protein	Cluster 1; R_up_day	Cluster 1; R_up_night	Transport overview.Electrochemical Potential-driven Transporters.Porters.Major Facilitator Superfamily.Vesicular Neurotransmitter Transporter
VIT_09s0054g01820	Indeterminate(ID)-domain 2	Cluster 1; R_up_day	Cluster 1; R_up_night	Regulation overview.Regulation of gene expression.Regulation of transcription.Transcription factor.C2H2 family transcription factor
VIT_09s0054g01890	No hit	Cluster 1; R_up_day	Cluster 1; R_up_night	No hit
VIT_09s0070g00110	S-adenosyl-L-methionine Mg-protoporphyrin IX methyltranserase	Cluster 1; R_up_day	Cluster 1; R_up_night	Metabolism.Primary metabolism.Cofactor metabolism.Tetrapyrrole metabolism.Chlorophyll metabolism
VIT_09s0070g00150	EMB2454	Cluster 1; R_up_day	Cluster 1; R_up_night	Development.Reproductive development.Embryo development
VIT_09s0070g00320	Male germ cell-associated kinase	Cluster 1; R_up_day	Cluster 1; R_up_night	Signaling.Signaling pathway.Protein kinase
VIT_09s0070g00680	Glycerol kinase	Cluster 1; R_up_day	Cluster 1; R_up_night	Metabolism.Primary metabolism.Lipid metabolism.Glycerolipid metabolism
VIT_09s0070g00760	Glycerol kinase	Cluster 1; R_up_day	Cluster 1; R_up_night	Metabolism.Primary metabolism.Lipid metabolism.Glycerolipid metabolism
VIT_09s0070g00820	AAA-type ATPase	Cluster 1; R_up_day	Cluster 1; R_up_night	Diverse functions.Gene family with diverse functions.AAA-type ATPase domain family
VIT_09s0096g00020	No hit	Cluster 1; R_up_day	Cluster 1; R_up_night	No hit
VIT_09s0096g00030	No hit	Cluster 1; R_up_day	Cluster 1; R_up_night	No hit
VIT_09s0096g00130	Pirin	Cluster 1; R_up_day	Cluster 1; R_up_night	Unknown
VIT_09s0096g00200	RPS5 (resistant to p. syringae 5)	Cluster 1; R_up_day	Cluster 1; R_up_night	Response to stimulus.Stress response.Biotic stress response.Plant-pathogen interaction.R proteins from Plant-pathogen interaction	Diverse functions.Gene family with diverse functions.NBS-LRR superfamily
VIT_09s0096g00260	No hit	Cluster 1; R_up_day	Cluster 1; R_up_night	No hit
VIT_09s0096g00420	RPS5 (resistant to p. syringae 5)	Cluster 1; R_up_day	Cluster 1; R_up_night	Response to stimulus.Stress response.Biotic stress response.Plant-pathogen interaction.R proteins from Plant-pathogen interaction	Diverse functions.Gene family with diverse functions.NBS-LRR superfamily
VIT_09s0096g00560	Phagocytosis and cell motility protein ELMO1	Cluster 1; R_up_day	Cluster 1; R_up_night	Unclassified
VIT_09s0096g00760	RPS5 (resistant to p. syringae 5)	Cluster 1; R_up_day	Cluster 1; R_up_night	Response to stimulus.Stress response.Biotic stress response.Plant-pathogen interaction.R proteins from Plant-pathogen interaction	Diverse functions.Gene family with diverse functions.NBS-LRR superfamily
VIT_09s0096g00840	NBS-LRR type disease resistance protein	Cluster 1; R_up_day	Cluster 1; R_up_night	Diverse functions.Gene family with diverse functions.NBS-LRR superfamily
VIT_09s0096g01000	Nuclear pore complex protein Nup155 (Nucleoporin 155)	Cluster 1; R_up_day	Cluster 1; R_up_night	Transport overview.Incompletely characterized transport systems.Recognized transporters of unknown biochemical mechanism.Nuclear pore complex	Transport overview.Nucleocytoplasmic transport.Nuclear pore complex	Transport overview.Macromolecule transport.RNA transport
VIT_10s0003g00140	Ethylene-responsive transcription factor 9	Cluster 1; R_up_day	Cluster 1; R_up_night	Signaling.Hormone Signaling.Ethylene Signaling.Ethylene-mediated Signaling pathway	Regulation overview.Regulation of gene expression.Regulation of transcription.Transcription factor.AP2 family transcription factor.ERF subfamily transcription factor
VIT_10s0003g00150	NSL1 (necrotic spotted lesions 1)	Cluster 1; R_up_day	Cluster 1; R_up_night	Cellular process.Cell growth and death.Cell death
VIT_10s0003g00170	Dehydration-induced 19	Cluster 1; R_up_day	Cluster 1; R_up_night	Response to stimulus.Stress response.Abiotic stress response.Drought stress response
VIT_10s0003g00410	MLO6 (mildew resistance locus O 6)	Cluster 1; R_up_day	Cluster 1; R_up_night	Cellular process.Cell growth and death.Cell death	Response to stimulus.Stress response.Biotic stress response
VIT_10s0003g00480	Isoflavone methyltransferase/ Orcinol O-methyltransferase 1 oomt1	Cluster 1; R_up_day	Cluster 1; R_up_night	Metabolism.Secondary metabolism.Phenylpropanoid metabolism.Flavonoid metabolism.Isoflavonoid metabolism.Isoflavonoid biosynthesis
VIT_10s0003g00710	Protein transport protein Sec61 subunit alpha	Cluster 1; R_up_day	Cluster 1; R_up_night	Transport overview.Macromolecule transport.Protein transport.Tethering factors	Transport overview.Primary Active Transporters.P-P-bond hydrolysis-driven transporters.General Secretory Pathway (Sec)	Cellular process.Cellular transport.Protein trafficking.Vesicle-mediated trafficking.Phagosome	Cellular process.Cellular transport.Protein trafficking	Metabolism.Primary metabolism.Protein metabolism and modification.Protein processing in endoplasmic reticulum
VIT_10s0003g00750	No hit	Cluster 1; R_up_day	Cluster 1; R_up_night	No hit
VIT_10s0003g00940	No hit	Cluster 1; R_up_day	Cluster 1; R_up_night	No hit
VIT_10s0003g01020	Unknown protein	Cluster 1; R_up_day	Cluster 1; R_up_night	Unknown
VIT_10s0003g01030	Unknown protein	Cluster 1; R_up_day	Cluster 1; R_up_night	Unknown
VIT_10s0003g01410	CBL-interacting protein kinase 20 (CIPK20)	Cluster 1; R_up_day	Cluster 1; R_up_night	Signaling.Signaling pathway.Protein kinase
VIT_10s0003g01430	MEE62 (maternal effect embryo arrest 62)	Cluster 1; R_up_day	Cluster 1; R_up_night	Signaling.Signaling pathway.Protein kinase
VIT_10s0003g01730	PUB17 (plant U- box 17)	Cluster 1; R_up_day	Cluster 1; R_up_night	Cellular process.Cell growth and death.Cell death	Metabolism.Primary metabolism.Protein metabolism and modification.Proteolysis.cytoplasmic and nuclear protein degradation.Ubiquitin-mediated proteolysis
VIT_10s0003g01770	Heat shock transcription factor A4A	Cluster 1; R_up_day	Cluster 1; R_up_night	Metabolism.Primary metabolism.Protein metabolism and modification.Protein folding.Chaperone-mediated protein folding.HSP-mediated protein folding	Regulation overview.Regulation of gene expression.Regulation of transcription.Transcription factor.HSF family transcription factor	Response to stimulus.Stress response.Abiotic stress response.Temperature stress response
VIT_10s0003g01940	RKF1 (receptor-like kinase in flowers 1)	Cluster 1; R_up_day	Cluster 1; R_up_night	Signaling.Signaling pathway.Protein kinase
VIT_10s0003g01970	No hit	Cluster 1; R_up_day	Cluster 1; R_up_night	No hit
VIT_10s0003g02370	No hit	Cluster 1; R_up_day	Cluster 1; R_up_night	No hit
VIT_10s0003g02610	Unknown protein	Cluster 1; R_up_day	Cluster 1; R_up_night	Unknown
VIT_10s0003g03030	Cation/hydrogen exchanger (CHX15)	Cluster 1; R_up_day	Cluster 1; R_up_night	Transport overview.Electrochemical Potential-driven Transporters.Porters.Monovalent Cation:Proton Antiporter-2	Transport overview.Ion transport.Cation transport.Proton transport
VIT_10s0003g03460	Multidrug resistance-associated protein 5	Cluster 1; R_up_day	Cluster 1; R_up_night	Transport overview.Macromolecule transport.Multidrug transport.Multidrug ABC transport
VIT_10s0003g04080	Unknown	Cluster 1; R_up_day	Cluster 1; R_up_night	Unknown
VIT_10s0003g04150	No hit	Cluster 1; R_up_day	Cluster 1; R_up_night	No hit
VIT_10s0003g04790	No hit	Cluster 1; R_up_day	Cluster 1; R_up_night	No hit
VIT_10s0003g05340	Germin-like protein	Cluster 1; R_up_day	Cluster 1; R_up_night	Metabolism.Primary metabolism.Generation of metabolite precursors and energy.Storage proteins
VIT_10s0003g05360	Germin-like protein	Cluster 1; R_up_day	Cluster 1; R_up_night	Metabolism.Primary metabolism.Generation of metabolite precursors and energy.Storage proteins
VIT_10s0003g05430	Reticuline oxidase precursor	Cluster 1; R_up_day	Cluster 1; R_up_night	Metabolism.Secondary metabolism.Primary amino acids derivated metabolism.Alkaloid metabolism.Alkaloid biosynthesis
VIT_10s0003g05440	No hit	Cluster 1; R_up_day	Cluster 1; R_up_night	No hit
VIT_10s0003g05450	Reticuline oxidase precursor	Cluster 1; R_up_day	Cluster 1; R_up_night	Metabolism.Secondary metabolism.Primary amino acids derivated metabolism.Alkaloid metabolism.Alkaloid biosynthesis
VIT_10s0003g05550	Carbohydrate oxidase	Cluster 1; R_up_day	Cluster 1; R_up_night	Unclear
VIT_10s0003g05570	Reticuline oxidase	Cluster 1; R_up_day	Cluster 1; R_up_night	Metabolism.Secondary metabolism.Primary amino acids derivated metabolism.Alkaloid metabolism.Alkaloid biosynthesis
VIT_10s0003g05580	Carbohydrate oxidase	Cluster 1; R_up_day	Cluster 1; R_up_night	Unclear
VIT_10s0003g05620	Carbohydrate oxidase	Cluster 1; R_up_day	Cluster 1; R_up_night	Unclear
VIT_10s0003g05720	Protein kinase MK6	Cluster 1; R_up_day	Cluster 1; R_up_night	Signaling.Signaling pathway.Protein kinase
VIT_10s0003g05820	SKP1-like 1 ASK1	Cluster 1; R_up_day	Cluster 1; R_up_night	Metabolism.Primary metabolism.Protein metabolism and modification.Proteolysis.cytoplasmic and nuclear protein degradation.Ubiquitin-mediated proteolysis	Cellular process.Cell growth and death	Metabolism.Primary metabolism.Protein metabolism and modification.Protein processing in endoplasmic reticulum
VIT_10s0042g00010	Strictosidine synthase	Cluster 1; R_up_day	Cluster 1; R_up_night	Metabolism.Secondary metabolism.Terpenoid metabolism.Terpenoid biosynthesis	Metabolism.Secondary metabolism.Terpenoid metabolism.Monoterpenoid metabolism.Monoterpenoid biosynthesis	Metabolism.Secondary metabolism.Primary amino acids derivated metabolism.Alkaloid metabolism.Alkaloid biosynthesis.Monoterpenoid indole alkaloid metabolism.Monoterpenoid indole alkaloid biosynthesis
VIT_10s0042g00020	Strictosidine synthase	Cluster 1; R_up_day	Cluster 1; R_up_night	Metabolism.Secondary metabolism.Terpenoid metabolism.Terpenoid biosynthesis	Metabolism.Secondary metabolism.Terpenoid metabolism.Monoterpenoid metabolism.Monoterpenoid biosynthesis	Metabolism.Secondary metabolism.Primary amino acids derivated metabolism.Alkaloid metabolism.Alkaloid biosynthesis.Monoterpenoid indole alkaloid metabolism.Monoterpenoid indole alkaloid biosynthesis
VIT_10s0042g00030	Strictosidine synthase	Cluster 1; R_up_day	Cluster 1; R_up_night	Metabolism.Secondary metabolism.Terpenoid metabolism.Terpenoid biosynthesis	Metabolism.Secondary metabolism.Terpenoid metabolism.Monoterpenoid metabolism.Monoterpenoid biosynthesis	Metabolism.Secondary metabolism.Primary amino acids derivated metabolism.Alkaloid metabolism.Alkaloid biosynthesis.Monoterpenoid indole alkaloid metabolism.Monoterpenoid indole alkaloid biosynthesis
VIT_10s0042g00050	Strictosidine synthase	Cluster 1; R_up_day	Cluster 1; R_up_night	Metabolism.Secondary metabolism.Terpenoid metabolism.Terpenoid biosynthesis	Metabolism.Secondary metabolism.Terpenoid metabolism.Monoterpenoid metabolism.Monoterpenoid biosynthesis	Metabolism.Secondary metabolism.Primary amino acids derivated metabolism.Alkaloid metabolism.Alkaloid biosynthesis.Monoterpenoid indole alkaloid metabolism.Monoterpenoid indole alkaloid biosynthesis
VIT_10s0042g00310	MRP-like ABC transporter	Cluster 1; R_up_day	Cluster 1; R_up_night	Transport overview.Macromolecule transport.Multidrug transport.Multidrug ABC transport
VIT_10s0042g00320	Myosin-like protein XIH	Cluster 1; R_up_day	Cluster 1; R_up_night	Cellular process.Cellular component organization and biogenesis.Cytoskeleton organization and biogenesis.Actin organization and biogenesis.Actin-driven movement
VIT_10s0042g00410	No hit	Cluster 1; R_up_day	Cluster 1; R_up_night	No hit
VIT_10s0042g00480	ABC transporter g family pleiotropic drug resistance 12 PDR12	Cluster 1; R_up_day	Cluster 1; R_up_night	Transport overview.Macromolecule transport.Multidrug transport.Multidrug ABC transport
VIT_10s0042g00850	Stilbene synthase [Vitis pseudoreticulata]	Cluster 1; R_up_day	Cluster 1; R_up_night	Metabolism.Secondary metabolism.Phenylpropanoid metabolism.Phenylpropanoid biosynthesis	Metabolism.Cellular metabolism.Phytoalexin metabolism.Phytoalexin biosynthesis	Metabolism.Secondary metabolism.Phenylpropanoid metabolism.Stilbenoid metabolism.Stilbenoid biosynthesis
VIT_10s0042g00860	Stilbene synthase [Vitis pseudoreticulata]	Cluster 1; R_up_day	Cluster 1; R_up_night	Metabolism.Secondary metabolism.Phenylpropanoid metabolism.Phenylpropanoid biosynthesis	Metabolism.Cellular metabolism.Phytoalexin metabolism.Phytoalexin biosynthesis	Metabolism.Secondary metabolism.Phenylpropanoid metabolism.Stilbenoid metabolism.Stilbenoid biosynthesis
VIT_10s0042g00910	Stilbene synthase [Vitis pseudoreticulata]	Cluster 1; R_up_day	Cluster 1; R_up_night	Metabolism.Secondary metabolism.Phenylpropanoid metabolism.Phenylpropanoid biosynthesis	Metabolism.Cellular metabolism.Phytoalexin metabolism.Phytoalexin biosynthesis	Metabolism.Secondary metabolism.Phenylpropanoid metabolism.Stilbenoid metabolism.Stilbenoid biosynthesis
VIT_10s0042g00940	Hydroxyproline-rich glycoprotein family protein	Cluster 1; R_up_day	Cluster 1; R_up_night	Cellular process.Cellular component organization and biogenesis.Cell wall organization and biogenesis.Cell wall structural protein	Regulation overview.Regulation of gene expression.Regulation of transcription.Transcription factor.Trihelix family transcription factor
VIT_10s0042g01310	No hit	Cluster 1; R_up_day	Cluster 1; R_up_night	No hit
VIT_10s0042g01410	No hit	Cluster 1; R_up_day	Cluster 1; R_up_night	No hit
VIT_10s0042g01470	Armadillo/beta-catenin repeat	Cluster 1; R_up_day	Cluster 1; R_up_night	Unknown
VIT_10s0071g00010	Strictosidine synthase	Cluster 1; R_up_day	Cluster 1; R_up_night	Metabolism.Secondary metabolism.Terpenoid metabolism.Terpenoid biosynthesis	Metabolism.Secondary metabolism.Terpenoid metabolism.Monoterpenoid metabolism.Monoterpenoid biosynthesis	Metabolism.Secondary metabolism.Primary amino acids derivated metabolism.Alkaloid metabolism.Alkaloid biosynthesis.Monoterpenoid indole alkaloid metabolism.Monoterpenoid indole alkaloid biosynthesis
VIT_10s0071g00170	Phosphatidylinositol 3- and 4-kinase / ubiquitin	Cluster 1; R_up_day	Cluster 1; R_up_night	Signaling.Signaling pathway.Protein kinase
VIT_10s0071g00190	R protein disease resistance protein	Cluster 1; R_up_day	Cluster 1; R_up_night	Response to stimulus.Stress response.Biotic stress response.Plant-pathogen interaction.R proteins from Plant-pathogen interaction
VIT_10s0071g00230	HcrVf1 protein	Cluster 1; R_up_day	Cluster 1; R_up_night	Diverse functions.Gene family with diverse functions.NBS-LRR superfamily	Response to stimulus.Stress response.Biotic stress response
VIT_10s0071g00300	Unknown protein	Cluster 1; R_up_day	Cluster 1; R_up_night	Unknown
VIT_10s0071g00320	GRAM domain-containing protein / ABA-responsive	Cluster 1; R_up_day	Cluster 1; R_up_night	Unknown
VIT_10s0071g00440	Serine/threonine-protein kinase receptor ARK3	Cluster 1; R_up_day	Cluster 1; R_up_night	Signaling.Signaling pathway.Protein kinase
VIT_10s0071g00480	Unknown	Cluster 1; R_up_day	Cluster 1; R_up_night	Unknown
VIT_10s0071g00590	GRAM domain-containing protein / ABA-responsive	Cluster 1; R_up_day	Cluster 1; R_up_night	Unknown
VIT_10s0071g00740	No hit	Cluster 1; R_up_day	Cluster 1; R_up_night	No hit
VIT_10s0071g01060	Pyruvate kinase	Cluster 1; R_up_day	Cluster 1; R_up_night	Metabolism.Primary metabolism.Carbohydrate metabolism.Glycolysis Gluconeogenesis.Glycolysis	Metabolism.Primary metabolism.Nucleobase, nucleoside, nucleotide, nucleic acid metabolism.Nucleotide metabolism.Purine metabolism	Metabolism.Primary metabolism.Carbohydrate metabolism.Monosaccharide metabolism.Pyruvate metabolism	Metabolism.Primary metabolism.Carbon fixation
VIT_10s0071g01180	No hit	Cluster 1; R_up_day	Cluster 1; R_up_night	No hit
VIT_10s0071g01210	No hit	Cluster 1; R_up_day	Cluster 1; R_up_night	No hit
VIT_10s0092g00160	No hit	Cluster 1; R_up_day	Cluster 1; R_up_night	No hit
VIT_10s0092g00180	DEGP7 (DEGP protease 7)	Cluster 1; R_up_day	Cluster 1; R_up_night	Metabolism.Primary metabolism.Protein metabolism and modification.Proteolysis.Peptidase-mediated proteolysis
VIT_10s0092g00380	Multidrug resistance-associated protein 3	Cluster 1; R_up_day	Cluster 1; R_up_night	Transport overview.Macromolecule transport.Multidrug transport.Multidrug ABC transport
VIT_10s0092g00410	No hit	Cluster 1; R_up_day	Cluster 1; R_up_night	No hit
VIT_10s0092g00420	No hit	Cluster 1; R_up_day	Cluster 1; R_up_night	No hit
VIT_10s0092g00430	No hit	Cluster 1; R_up_day	Cluster 1; R_up_night	No hit
VIT_10s0092g00470	SHR5-receptor-like kinase	Cluster 1; R_up_day	Cluster 1; R_up_night	Signaling.Signaling pathway.Protein kinase
VIT_10s0092g00560	Transducin protein	Cluster 1; R_up_day	Cluster 1; R_up_night	Unclear
VIT_10s0092g00650	Receptor kinase RK20-1	Cluster 1; R_up_day	Cluster 1; R_up_night	Signaling.Signaling pathway.Protein kinase
VIT_10s0092g00660	CBS domain containing protein	Cluster 1; R_up_day	Cluster 1; R_up_night	Unknown
VIT_10s0092g00710	Receptor protein kinase	Cluster 1; R_up_day	Cluster 1; R_up_night	Signaling.Signaling pathway.Protein kinase
VIT_10s0116g00040	No hit	Cluster 1; R_up_day	Cluster 1; R_up_night	No hit
VIT_10s0116g00410	Gibberellin 2-beta-dioxygenase 7	Cluster 1; R_up_day	Cluster 1; R_up_night	Metabolism.Secondary metabolism.Terpenoid metabolism.Diterpenoid metabolism.Diterpenoid biosynthesis	Signaling.Hormone Signaling.Gibberellic acid Signaling.Gibberellic acid metabolism.Gibberellic acid catabolism
VIT_10s0116g00980	Unknown protein	Cluster 1; R_up_day	Cluster 1; R_up_night	Unknown
VIT_10s0116g01280	Prefoldin	Cluster 1; R_up_day	Cluster 1; R_up_night	Metabolism.Primary metabolism.Protein metabolism and modification.Protein folding
VIT_10s0116g01300	No hit	Cluster 1; R_up_day	Cluster 1; R_up_night	No hit
VIT_10s0116g01650	5'-adenylylsulfate reductase (APR1)	Cluster 1; R_up_day	Cluster 1; R_up_night	Metabolism.Cellular metabolism.Nitrogen and sulfur metabolism.Sulfur metabolism.Sulfate assimilation
VIT_10s0116g01730	Soluble starch synthase 3	Cluster 1; R_up_day	Cluster 1; R_up_night	Metabolism.Primary metabolism.Carbohydrate metabolism.Polysaccharide metabolism.Starch and sucrose metabolism.Starch biosynthesis catabolism.Starch biosynthesis
VIT_11s0016g00060	No hit	Cluster 1; R_up_day	Cluster 1; R_up_night	No hit
VIT_11s0016g00440	Phosphoinositide phosphatase	Cluster 1; R_up_day	Cluster 1; R_up_night	Metabolism.Primary metabolism.Carbohydrate metabolism.Monosaccharide metabolism.Inositol phosphate metabolism	Signaling.Signaling pathway.Phosphatidylinositol Signaling
VIT_11s0016g00570	Dimethylaniline monooxygenase (N-oxide forming) 2	Cluster 1; R_up_day	Cluster 1; R_up_night	Metabolism.single reactions	Metabolism.Cellular metabolism.Oxidation reduction.Flavin-containing monooxygenase
VIT_11s0016g00670	AP2 domain-containing transcription factor	Cluster 1; R_up_day	Cluster 1; R_up_night	Signaling.Hormone Signaling.Ethylene Signaling.Ethylene-mediated Signaling pathway	Regulation overview.Regulation of gene expression.Regulation of transcription.Transcription factor.AP2 family transcription factor.DREB subfamily transcription factor
VIT_11s0016g00710	Jasmonate ZIM-domain protein 1	Cluster 1; R_up_day	Cluster 1; R_up_night	Signaling.Hormone Signaling.Jasmonate salicylate signaling.Jasmonate Signaling.Jasmonate-mediated Signaling pathway	Regulation overview.Regulation of gene expression.Regulation of transcription.Transcription factor.ZIM family transcription factor	Regulation overview.Regulation of gene expression.Regulation of transcription.Transcription factor.JAZ family transcription factor
VIT_11s0016g00810	Inter-alpha-trypsin inhibitor heavy chain	Cluster 1; R_up_day	Cluster 1; R_up_night	Transposable elements viral and plasmid proteins.Protein from transposable element
VIT_11s0016g00930	Unknown protein	Cluster 1; R_up_day	Cluster 1; R_up_night	Unknown
VIT_11s0016g01010	Serine/threonine-protein kinase NAK	Cluster 1; R_up_day	Cluster 1; R_up_night	Signaling.Signaling pathway.Protein kinase
VIT_11s0016g01210	Pentatricopeptide (PPR) repeat-containing	Cluster 1; R_up_day	Cluster 1; R_up_night	Diverse functions.Gene family with diverse functions.Pentatricopeptide domain family
VIT_11s0016g01860	RPS2 (resistant to p. syringae 2)	Cluster 1; R_up_day	Cluster 1; R_up_night	Response to stimulus.Stress response.Biotic stress response.Plant-pathogen interaction	Diverse functions.Gene family with diverse functions.NBS-LRR superfamily
VIT_11s0016g02220	Transducin family protein / WD-40 repeat	Cluster 1; R_up_day	Cluster 1; R_up_night	Unclear
VIT_11s0016g02380	1-aminocyclopropane-1-carboxylate oxidase 2	Cluster 1; R_up_day	Cluster 1; R_up_night	Metabolism.Primary metabolism.Organic acid metabolism.Propanoate metabolism	Signaling.Hormone Signaling.Ethylene Signaling.Ethylene-mediated Signaling pathway	Signaling.Hormone Signaling.Ethylene Signaling.Ethylene metabolism.Ethylene biosynthesis
VIT_11s0016g02470	Carrier protein	Cluster 1; R_up_day	Cluster 1; R_up_night	Transport overview.Electrochemical Potential-driven Transporters.Porters.Mitochondrial Carrier	Transport overview.Mitochondrial membrane transport
VIT_11s0016g02540	Xaa-Pro dipeptidase	Cluster 1; R_up_day	Cluster 1; R_up_night	Metabolism.Primary metabolism.Protein metabolism and modification.Proteolysis.Peptidase-mediated proteolysis
VIT_11s0016g02830	Gamma-glutamyltranspeptidase	Cluster 1; R_up_day	Cluster 1; R_up_night	Metabolism.Primary metabolism.Amino acid metabolism.Cysteine metabolism	Metabolism.Cellular metabolism.Amino acid derivative metabolism.Selenoamino acid metabolism	Metabolism.Primary metabolism.Coenzyme and prosthetic group metabolism.Peptide derived compounds biosynthesis.Glutathione metabolism.Glutathione catabolism	Metabolism.Primary metabolism.Amino acid metabolism.Glutamine metabolism.Peptide glutamine transferase
VIT_11s0016g02850	Phosphofructokinase	Cluster 1; R_up_day	Cluster 1; R_up_night	Metabolism.Primary metabolism.Carbohydrate metabolism.Monosaccharide metabolism.Fructose and mannose metabolism	Metabolism.Primary metabolism.Carbohydrate metabolism.Glycolysis Gluconeogenesis
VIT_11s0016g03190	Unknown	Cluster 1; R_up_day	Cluster 1; R_up_night	Unknown
VIT_11s0016g03200	Gibberellin oxidase	Cluster 1; R_up_day	Cluster 1; R_up_night	Metabolism.Secondary metabolism.Terpenoid metabolism.Diterpenoid metabolism.Diterpenoid biosynthesis	Signaling.Hormone Signaling.Gibberellic acid Signaling.Gibberellic acid metabolism.Gibberellic acid biosynthesis
VIT_11s0016g03660	Glucose transporter 2 plastidic	Cluster 1; R_up_day	Cluster 1; R_up_night	Transport overview.Electrochemical Potential-driven Transporters.Porters.Major Facilitator Superfamily.Sugar Porter	Transport overview.Macromolecule transport.Carbohydrate transport.Sugar transport
VIT_11s0016g03690	Peroxisomal fatty acid beta-oxidation multifunctional protein (aim1)	Cluster 1; R_up_day	Cluster 1; R_up_night	Metabolism.Primary metabolism.Lipid metabolism.Fatty acid metabolism.Fatty acid biosynthesis.Fatty acid elongation	Metabolism.Primary metabolism.Lipid metabolism.Fatty acid metabolism.Fatty acid catabolism.Fatty acid beta-oxidation	Metabolism.Primary metabolism.Amino acid metabolism.Valine, leucine, and isoleucine metabolism.Valine, leucine, and isoleucine catabolism	Metabolism.Primary metabolism.Lipid metabolism.Fatty acid metabolism.Alpha-linolenic acid metabolism	Metabolism.Primary metabolism.Organic acid metabolism.Propanoate metabolism	Metabolism.Primary metabolism.Organic acid metabolism.Butanoate metabolism	Metabolism.Secondary metabolism.Iba metabolism
VIT_11s0016g03770	Dynein light chain LC6	Cluster 1; R_up_day	Cluster 1; R_up_night	Cellular process.Cellular component organization and biogenesis.Cytoskeleton organization and biogenesis.Microtubule organization and biogenesis.Microtubule-driven movement
VIT_11s0016g03950	Dehydration-responsive protein (RD22)	Cluster 1; R_up_day	Cluster 1; R_up_night	Response to stimulus.Stress response.Abiotic stress response.Drought stress response
VIT_11s0016g03990	R protein PRF disease resistance protein	Cluster 1; R_up_day	Cluster 1; R_up_night	Response to stimulus.Stress response.Biotic stress response.Plant-pathogen interaction.R proteins from Plant-pathogen interaction
VIT_11s0016g04050	No hit	Cluster 1; R_up_day	Cluster 1; R_up_night	No hit
VIT_11s0016g04310	No hit	Cluster 1; R_up_day	Cluster 1; R_up_night	No hit
VIT_11s0016g04340	Unknown protein	Cluster 1; R_up_day	Cluster 1; R_up_night	Unknown
VIT_11s0016g04790	No hit	Cluster 1; R_up_day	Cluster 1; R_up_night	No hit
VIT_11s0016g05130	Signal peptidase	Cluster 1; R_up_day	Cluster 1; R_up_night	Metabolism.Primary metabolism.Protein metabolism and modification.Proteolysis.Peptidase-mediated proteolysis	Cellular process.Cellular transport.Protein trafficking
VIT_11s0016g05280	Peroxidase	Cluster 1; R_up_day	Cluster 1; R_up_night	Metabolism.Primary metabolism.Amino acid metabolism.Aromatic amino acid metabolism.Phenylalanine metabolism.Phenylalanine biosynthesis	Metabolism.Cellular metabolism.Methane metabolism	Response to stimulus.Stress response.Abiotic stress response.Oxidative stress response
VIT_11s0016g05600	Zinc finger (ubiquitin-hydrolase) domain-containing	Cluster 1; R_up_day	Cluster 1; R_up_night	Regulation overview.Regulation of gene expression.Regulation of transcription.Transcription factor.Other zinc finger family transcription factor
VIT_11s0016g05670	RabGAP/TBC domain-containing protein	Cluster 1; R_up_day	Cluster 1; R_up_night	Signaling.Signaling pathway.G-protein signaling pathway.RAB-GTPase regulation
VIT_11s0016g05680	RAB GTPase activator	Cluster 1; R_up_day	Cluster 1; R_up_night	Signaling.Signaling pathway.G-protein signaling pathway
VIT_11s0016g05780	No hit	Cluster 1; R_up_day	Cluster 1; R_up_night	No hit
VIT_11s0037g00130	fip1 motif-containing protein	Cluster 1; R_up_day	Cluster 1; R_up_night	Metabolism.Primary metabolism.Nucleobase, nucleoside, nucleotide, nucleic acid metabolism.Nucleic acid metabolism.RNA metabolism
VIT_11s0037g00390	Unknown protein	Cluster 1; R_up_day	Cluster 1; R_up_night	Unknown
VIT_11s0037g00470	No hit	Cluster 1; R_up_day	Cluster 1; R_up_night	No hit
VIT_11s0037g00480	Unknown protein	Cluster 1; R_up_day	Cluster 1; R_up_night	Unknown
VIT_11s0037g00680	Leucine Rich Repeat receptor-like kinase	Cluster 1; R_up_day	Cluster 1; R_up_night	Signaling.Signaling pathway.Protein kinase
VIT_11s0037g00700	Unknown protein	Cluster 1; R_up_day	Cluster 1; R_up_night	Unknown
VIT_11s0037g00710	Trehalose-phosphate phosphatase	Cluster 1; R_up_day	Cluster 1; R_up_night	Metabolism.Primary metabolism.Carbohydrate metabolism.Polysaccharide metabolism.Starch and sucrose metabolism	Metabolism.Primary metabolism.Carbohydrate metabolism.Oligosaccharide metabolism.Trehalose metabolism
VIT_11s0037g00720	Trehalose-phosphate phosphatase	Cluster 1; R_up_day	Cluster 1; R_up_night	Metabolism.Primary metabolism.Carbohydrate metabolism.Polysaccharide metabolism.Starch and sucrose metabolism	Metabolism.Primary metabolism.Carbohydrate metabolism.Oligosaccharide metabolism.Trehalose metabolism
VIT_11s0037g00800	Serine carboxypeptidase II	Cluster 1; R_up_day	Cluster 1; R_up_night	Metabolism.Primary metabolism.Protein metabolism and modification.Proteolysis.Peptidase-mediated proteolysis
VIT_11s0037g00980	Unknown	Cluster 1; R_up_day	Cluster 1; R_up_night	Unknown
VIT_11s0037g01200	Unknown	Cluster 1; R_up_day	Cluster 1; R_up_night	Unknown
VIT_11s0037g01250	Dolichyl-phosphate-mannose--glycolipid alpha-mannosyltransferase	Cluster 1; R_up_day	Cluster 1; R_up_night	Metabolism.Primary metabolism.Carbohydrate metabolism.Oligosaccharide metabolism.N-Glycan metabolism.N-Glycan biosynthesis
VIT_11s0037g01360	NADH dehydrogenase subunit 4	Cluster 1; R_up_day	Cluster 1; R_up_night	Metabolism.Primary metabolism.Generation of metabolite precursors and energy.Electron transport.Respiratory-chain phosphorylation	Transport overview.Primary Active Transporters.Oxidoreduction-driven transporters.Proton-translocating NADH Dehydrogenase
VIT_11s0052g00050	No hit	Cluster 1; R_up_day	Cluster 1; R_up_night	No hit
VIT_11s0052g00350	Receptor kinase TRKe	Cluster 1; R_up_day	Cluster 1; R_up_night	Signaling.Signaling pathway.Protein kinase
VIT_11s0052g00360	No hit	Cluster 1; R_up_day	Cluster 1; R_up_night	No hit
VIT_11s0052g00520	Extracellular ribonuclease precursor	Cluster 1; R_up_day	Cluster 1; R_up_night	Metabolism.Primary metabolism.Nucleobase, nucleoside, nucleotide, nucleic acid metabolism.Nucleic acid metabolism.RNA metabolism
VIT_11s0052g00580	No hit	Cluster 1; R_up_day	Cluster 1; R_up_night	No hit
VIT_11s0052g00610	Homogenitisate geranylgeranyl transferase	Cluster 1; R_up_day	Cluster 1; R_up_night	Metabolism.Primary metabolism.Lipid metabolism.Steroid metabolism.Steroid biosynthesis	Metabolism.Secondary metabolism.Terpenoid metabolism.Terpenoid biosynthesis.Terpenoid-quinone biosynthesis
VIT_11s0052g00630	Metallothionein	Cluster 1; R_up_day	Cluster 1; R_up_night	Cellular process.Cellular homeostasis.Heavy metal ion homeostasis
VIT_11s0052g00760	No hit	Cluster 1; R_up_day	Cluster 1; R_up_night	No hit
VIT_11s0052g01190	Xyloglucan endotransglucosylase-hydrolase XTH3	Cluster 1; R_up_day	Cluster 1; R_up_night	Cellular process.Cellular component organization and biogenesis.Cell wall organization and biogenesis.Cell wall metabolism.Cell wall modification.Xyloglucan modification
VIT_11s0052g01430	Receptor kinase TRKe	Cluster 1; R_up_day	Cluster 1; R_up_night	Signaling.Signaling pathway.Protein kinase
VIT_11s0065g00020	Unknown	Cluster 1; R_up_day	Cluster 1; R_up_night	Unknown
VIT_11s0065g00070	Histone-lysine N-methyltransferase ATXR3	Cluster 1; R_up_day	Cluster 1; R_up_night	Metabolism.Primary metabolism.Amino acid metabolism.Lysine metabolism	Regulation overview.Regulation of gene expression.Regulation of transcription.Transcription factor.SET PCG family transcription factor	Cellular process.Cellular component organization and biogenesis.Nucleus.Chromosome organization and biogenesis.Chromatin organization	Metabolism.Primary metabolism.Protein metabolism and modification.Protein modification.Protein methylation.Histone methylation	Regulation overview.Regulation of gene expression.Epigenetic regulation of gene expression
VIT_11s0065g00090	Unknown	Cluster 1; R_up_day	Cluster 1; R_up_night	Unknown
VIT_11s0065g01050	No hit	Cluster 1; R_up_day	Cluster 1; R_up_night	No hit
VIT_11s0065g01230	No hit	Cluster 1; R_up_day	Cluster 1; R_up_night	No hit
VIT_11s0078g00150	EXECUTER1 protein	Cluster 1; R_up_day	Cluster 1; R_up_night	Unknown
VIT_11s0078g00230	N2	Cluster 1; R_up_day	Cluster 1; R_up_night	Metabolism.Primary metabolism.Amino acid metabolism.Methionine metabolism
VIT_11s0103g00280	No hit	Cluster 1; R_up_day	Cluster 1; R_up_night	No hit
VIT_11s0103g00390	DNA-directed RNA polymerase subunit beta'	Cluster 1; R_up_day	Cluster 1; R_up_night	Metabolism.Primary metabolism.Nucleobase, nucleoside, nucleotide, nucleic acid metabolism.Nucleic acid metabolism.RNA metabolism.RNA polymerase	Metabolism.Primary metabolism.Nucleobase, nucleoside, nucleotide, nucleic acid metabolism.Nucleic acid metabolism.RNA metabolism.RNA biosynthesis
VIT_11s0103g00440	No hit	Cluster 1; R_up_day	Cluster 1; R_up_night	No hit
VIT_11s0118g00040	Receptor Like Protein 9	Cluster 1; R_up_day	Cluster 1; R_up_night	Signaling.Signaling pathway.Protein kinase
VIT_11s0118g00050	EIX receptor	Cluster 1; R_up_day	Cluster 1; R_up_night	Diverse functions.Gene family with diverse functions.NBS-LRR superfamily	Response to stimulus.Stress response.Biotic stress response
VIT_11s0118g00080	Disease resistance protein	Cluster 1; R_up_day	Cluster 1; R_up_night	Diverse functions.Gene family with diverse functions.NBS-LRR superfamily	Response to stimulus.Stress response.Biotic stress response
VIT_11s0118g00090	Leucine-rich repeat family protein	Cluster 1; R_up_day	Cluster 1; R_up_night	Diverse functions.Gene family with diverse functions.NBS-LRR superfamily
VIT_11s0118g00160	Disease resistance protein	Cluster 1; R_up_day	Cluster 1; R_up_night	Diverse functions.Gene family with diverse functions.NBS-LRR superfamily	Response to stimulus.Stress response.Biotic stress response
VIT_11s0118g00200	Sucrose-phosphate synthase	Cluster 1; R_up_day	Cluster 1; R_up_night	Metabolism.Primary metabolism.Carbohydrate metabolism.Polysaccharide metabolism.Starch and sucrose metabolism.Sucrose biosynthesis
VIT_11s0118g00400	Oxidoreductase	Cluster 1; R_up_day	Cluster 1; R_up_night	Metabolism.Cellular metabolism.Oxidation reduction.2OG-Fe(II) oxygenase superfamily
VIT_11s0118g00490	Octicosapeptide/Phox/Bem1p (PB1) domain-containing protein	Cluster 1; R_up_day	Cluster 1; R_up_night	Transport overview.Primary Active Transporters.P-P-bond hydrolysis-driven transporters.Mitochondrial Protein Translocase
VIT_11s0118g00820	D111/G-patch domain-containing protein	Cluster 1; R_up_day	Cluster 1; R_up_night	Unknown
VIT_11s0149g00280	Chitinase A	Cluster 1; R_up_day	Cluster 1; R_up_night	Metabolism.Primary metabolism.Carbohydrate metabolism.Monosaccharide metabolism.Amino sugar metabolism	Response to stimulus.Stress response
VIT_11s0149g00390	Diadenosine tetraphosphatase	Cluster 1; R_up_day	Cluster 1; R_up_night	Metabolism.Primary metabolism.Nucleobase, nucleoside, nucleotide, nucleic acid metabolism.Nucleotide metabolism.Purine metabolism	Metabolism.Primary metabolism.Nucleobase, nucleoside, nucleotide, nucleic acid metabolism.Nucleotide metabolism.Pyrimidine metabolism
VIT_11s0206g00020	Isopentenyl diphosphate isomerase 2	Cluster 1; R_up_day	Cluster 1; R_up_night	Metabolism.Primary metabolism.Lipid metabolism.Steroid metabolism.Steroid biosynthesis	Metabolism.Secondary metabolism.Terpenoid metabolism.Terpenoid biosynthesis
VIT_12s0028g00170	Low expression of osmotically responsive genes 1	Cluster 1; R_up_day	Cluster 1; R_up_night	Transport overview.Primary Active Transporters.P-P-bond hydrolysis-driven transporters.Nuclear mRNA Exporter	Metabolism.Primary metabolism.Nucleobase, nucleoside, nucleotide, nucleic acid metabolism.Nucleic acid metabolism.RNA metabolism
VIT_12s0028g00560	Unknown	Cluster 1; R_up_day	Cluster 1; R_up_night	Unknown
VIT_12s0028g00580	Unknown protein	Cluster 1; R_up_day	Cluster 1; R_up_night	Unknown
VIT_12s0028g00670	Zinc knuckle	Cluster 1; R_up_day	Cluster 1; R_up_night	Metabolism.Primary metabolism.Nucleobase, nucleoside, nucleotide, nucleic acid metabolism.Nucleic acid metabolism
VIT_12s0028g00710	4-hydroxyphenylpyruvate dioxygenase	Cluster 1; R_up_day	Cluster 1; R_up_night	Metabolism.Primary metabolism.Amino acid metabolism.Aromatic amino acid metabolism.Tyrosine metabolism.Tyrosine catabolism	Metabolism.Primary metabolism.Amino acid metabolism.Aromatic amino acid metabolism.Phenylalanine metabolism.Phenylalanine biosynthesis	Metabolism.Primary metabolism.Amino acid metabolism.Amino acid catabolism	Metabolism.Secondary metabolism.Terpenoid metabolism.Terpenoid biosynthesis.Terpenoid-quinone biosynthesis
VIT_12s0028g00860	NAC domain-containing protein 42	Cluster 1; R_up_day	Cluster 1; R_up_night	Regulation overview.Regulation of gene expression.Regulation of transcription.Transcription factor.NAC family transcription factor
VIT_12s0028g00980	Myb family	Cluster 1; R_up_day	Cluster 1; R_up_night	Regulation overview.Regulation of gene expression.Regulation of transcription.Transcription factor.G2-like family transcription factor
VIT_12s0028g01060	No hit	Cluster 1; R_up_day	Cluster 1; R_up_night	No hit
VIT_12s0028g01540	NADPH-dependent mannose 6-phosphate reductase	Cluster 1; R_up_day	Cluster 1; R_up_night	Metabolism.Primary metabolism.Carbohydrate metabolism.Monosaccharide metabolism.Fructose and mannose metabolism
VIT_12s0028g01590	No hit	Cluster 1; R_up_day	Cluster 1; R_up_night	No hit
VIT_12s0028g01780	FAD-linked oxidoreductase 1	Cluster 1; R_up_day	Cluster 1; R_up_night	Unclear
VIT_12s0028g02730	AarF domain-containing kinase ABC1	Cluster 1; R_up_day	Cluster 1; R_up_night	Signaling.Signaling pathway.Protein kinase
VIT_12s0028g02890	O-methyltransferase	Cluster 1; R_up_day	Cluster 1; R_up_night	Unknown
VIT_12s0028g02970	MLO1	Cluster 1; R_up_day	Cluster 1; R_up_night	Cellular process.Cell growth and death.Cell death	Response to stimulus.Stress response.Biotic stress response
VIT_12s0028g03820	No hit	Cluster 1; R_up_day	Cluster 1; R_up_night	No hit
VIT_12s0028g03890	Unknown protein	Cluster 1; R_up_day	Cluster 1; R_up_night	Unknown
VIT_12s0034g00020	No hit	Cluster 1; R_up_day	Cluster 1; R_up_night	No hit
VIT_12s0034g00090	No hit	Cluster 1; R_up_day	Cluster 1; R_up_night	No hit
VIT_12s0034g00180	Acyl-[acyl-carrier-protein] desaturase	Cluster 1; R_up_day	Cluster 1; R_up_night	Metabolism.Primary metabolism.Lipid metabolism.Fatty acid metabolism.Fatty acid biosynthesis.Unsaturated fatty acid biosynthesis
VIT_12s0034g00280	R protein L6	Cluster 1; R_up_day	Cluster 1; R_up_night	Response to stimulus.Stress response.Biotic stress response.Plant-pathogen interaction.R proteins from Plant-pathogen interaction
VIT_12s0034g00450	No hit	Cluster 1; R_up_day	Cluster 1; R_up_night	No hit
VIT_12s0034g00550	Ubiquitin-protein ligase E3 UBR3	Cluster 1; R_up_day	Cluster 1; R_up_night	Metabolism.Primary metabolism.Protein metabolism and modification.Proteolysis.cytoplasmic and nuclear protein degradation.Ubiquitin-mediated proteolysis
VIT_12s0034g00750	MEKK1	Cluster 1; R_up_day	Cluster 1; R_up_night	Metabolism.Primary metabolism.Protein metabolism and modification.Proteolysis.cytoplasmic and nuclear protein degradation.Ubiquitin-mediated proteolysis	Response to stimulus.Stress response.Biotic stress response.Plant-pathogen interaction	Signaling.Signaling pathway.Protein kinase.MAPK cascade
VIT_12s0034g00940	Proteasome 26S regulatory subunit (RPN6)	Cluster 1; R_up_day	Cluster 1; R_up_night	Metabolism.Primary metabolism.Protein metabolism and modification.Proteolysis.cytoplasmic and nuclear protein degradation.Ubiquitin-mediated proteolysis.Proteasome
VIT_12s0034g01160	Blue (type 1) copper domain	Cluster 1; R_up_day	Cluster 1; R_up_night	Unclassified
VIT_12s0034g01280	Exportin1 (XPO1)	Cluster 1; R_up_day	Cluster 1; R_up_night	Transport overview.Nucleocytoplasmic transport.Nuclear pore complex	Transport overview.Macromolecule transport.Protein transport.Protein import into nucleus	Cellular process.Cellular component organization and biogenesis.Ribosome organization and biogenesis	Transport overview.Macromolecule transport.RNA transport
VIT_12s0034g01410	Rhomboid	Cluster 1; R_up_day	Cluster 1; R_up_night	Unclear
VIT_12s0034g01590	Ribosomal protein S26 (RPS26C) 40S	Cluster 1; R_up_day	Cluster 1; R_up_night	Metabolism.Primary metabolism.Protein metabolism and modification.Protein synthesis.Ribosome
VIT_12s0034g01700	R protein disease resistance protein	Cluster 1; R_up_day	Cluster 1; R_up_night	Response to stimulus.Stress response.Biotic stress response.Plant-pathogen interaction.R proteins from Plant-pathogen interaction
VIT_12s0034g01740	R protein MLA10	Cluster 1; R_up_day	Cluster 1; R_up_night	Response to stimulus.Stress response.Biotic stress response.Plant-pathogen interaction.R proteins from Plant-pathogen interaction
VIT_12s0034g01750	R protein MLA10	Cluster 1; R_up_day	Cluster 1; R_up_night	Response to stimulus.Stress response.Biotic stress response.Plant-pathogen interaction.R proteins from Plant-pathogen interaction
VIT_12s0034g01870	Cupin	Cluster 1; R_up_day	Cluster 1; R_up_night	Unknown
VIT_12s0034g01890	Cupin region	Cluster 1; R_up_day	Cluster 1; R_up_night	Unknown
VIT_12s0034g01900	Globulin-like protein	Cluster 1; R_up_day	Cluster 1; R_up_night	Metabolism.Primary metabolism.Generation of metabolite precursors and energy.Storage proteins
VIT_12s0034g01910	Cupin family protein	Cluster 1; R_up_day	Cluster 1; R_up_night	Metabolism.Primary metabolism.Generation of metabolite precursors and energy.Storage proteins
VIT_12s0034g01920	No hit	Cluster 1; R_up_day	Cluster 1; R_up_night	No hit
VIT_12s0034g01930	Globulin-like protein	Cluster 1; R_up_day	Cluster 1; R_up_night	Metabolism.Primary metabolism.Generation of metabolite precursors and energy.Storage proteins
VIT_12s0034g01950	Legumin	Cluster 1; R_up_day	Cluster 1; R_up_night	Unknown
VIT_12s0034g01970	Cupin	Cluster 1; R_up_day	Cluster 1; R_up_night	Unknown
VIT_12s0034g01980	Globulin-like protein	Cluster 1; R_up_day	Cluster 1; R_up_night	Metabolism.Primary metabolism.Generation of metabolite precursors and energy.Storage proteins
VIT_12s0034g02210	CW14	Cluster 1; R_up_day	Cluster 1; R_up_night	Unknown
VIT_12s0034g02390	T-complex protein 11	Cluster 1; R_up_day	Cluster 1; R_up_night	Metabolism.Primary metabolism.Protein metabolism and modification.Protein folding.Chaperone-mediated protein folding.Chaperonin
VIT_12s0034g02410	Unknown	Cluster 1; R_up_day	Cluster 1; R_up_night	Unknown
VIT_12s0034g02450	Unknown	Cluster 1; R_up_day	Cluster 1; R_up_night	Unknown
VIT_12s0034g02460	Unknown	Cluster 1; R_up_day	Cluster 1; R_up_night	Unknown
VIT_12s0034g02490	Unknown	Cluster 1; R_up_day	Cluster 1; R_up_night	Unknown
VIT_12s0034g02600	Leucine Rich Repeat receptor-like kinase	Cluster 1; R_up_day	Cluster 1; R_up_night	Signaling.Signaling pathway.Protein kinase
VIT_12s0035g00060	DNA (cytosine-5)-methyltransferase	Cluster 1; R_up_day	Cluster 1; R_up_night	Metabolism.Primary metabolism.Amino acid metabolism.Methionine metabolism	Metabolism.Primary metabolism.Nucleobase, nucleoside, nucleotide, nucleic acid metabolism.Nucleic acid metabolism.DNA metabolism.DNA modification.DNA methylation
VIT_12s0035g00100	Receptor protein kinase	Cluster 1; R_up_day	Cluster 1; R_up_night	Signaling.Signaling pathway.Protein kinase
VIT_12s0035g00110	Leucine Rich Repeat receptor-like kinase	Cluster 1; R_up_day	Cluster 1; R_up_night	Signaling.Signaling pathway.Protein kinase
VIT_12s0035g00140	Leucine Rich Repeat receptor-like kinase	Cluster 1; R_up_day	Cluster 1; R_up_night	Signaling.Signaling pathway.Protein kinase
VIT_12s0035g00160	Cleavage and polyadenylation specificity factor subunit 3	Cluster 1; R_up_day	Cluster 1; R_up_night	Metabolism.Primary metabolism.Nucleobase, nucleoside, nucleotide, nucleic acid metabolism.Nucleic acid metabolism.RNA metabolism.RNA processing	Metabolism.Primary metabolism.Nucleobase, nucleoside, nucleotide, nucleic acid metabolism.Nucleic acid metabolism.RNA metabolism.RNA catabolism.RNA surveillance
VIT_12s0035g00180	Leucine-rich repeat protein kinase	Cluster 1; R_up_day	Cluster 1; R_up_night	Signaling.Signaling pathway.Protein kinase
VIT_12s0035g00290	Sugar transporter ERD6-like 6	Cluster 1; R_up_day	Cluster 1; R_up_night	Transport overview.Electrochemical Potential-driven Transporters.Porters.Major Facilitator Superfamily.Sugar Porter	Transport overview.Macromolecule transport.Carbohydrate transport.Sugar transport
VIT_12s0035g00350	AAA-type ATPase	Cluster 1; R_up_day	Cluster 1; R_up_night	Diverse functions.Gene family with diverse functions.AAA-type ATPase domain family
VIT_12s0035g00360	AAA-type ATPase	Cluster 1; R_up_day	Cluster 1; R_up_night	Diverse functions.Gene family with diverse functions.AAA-type ATPase domain family
VIT_12s0035g00680	ACR4 (Arabidopsis CRINKLY4)	Cluster 1; R_up_day	Cluster 1; R_up_night	Signaling.Signaling pathway.Calcium sensors and Signaling	Signaling.Signaling pathway.Protein kinase
VIT_12s0035g01000	Serine protease inhibitor	Cluster 1; R_up_day	Cluster 1; R_up_night	Metabolism.Primary metabolism.Protein metabolism and modification.Proteolysis.Protease inhibition
VIT_12s0035g01050	Octicosapeptide/Phox/Bem1p (PB1) domain-containing protein	Cluster 1; R_up_day	Cluster 1; R_up_night	Unknown
VIT_12s0035g01120	Elongation factor 1-gamma	Cluster 1; R_up_day	Cluster 1; R_up_night	Metabolism.Primary metabolism.Protein metabolism and modification.Protein synthesis.Translation.Translational elongation
VIT_12s0035g01230	MEK kinase	Cluster 1; R_up_day	Cluster 1; R_up_night	Signaling.Signaling pathway.Protein kinase.MAPK cascade
VIT_12s0035g01240	No hit	Cluster 1; R_up_day	Cluster 1; R_up_night	No hit
VIT_12s0035g01850	MATE antiporter/ drug transporter	Cluster 1; R_up_day	Cluster 1; R_up_night	Transport overview.Electrochemical Potential-driven Transporters.Porters.Multidrug/Oligosaccharidyl-lipid/Polysaccharide Flippase.Multi Antimicrobial Extrusion	Transport overview.Macromolecule transport.Multidrug transport
VIT_12s0035g02220	No hit	Cluster 1; R_up_day	Cluster 1; R_up_night	No hit
VIT_12s0035g02230	No hit	Cluster 1; R_up_day	Cluster 1; R_up_night	No hit
VIT_12s0055g00040	CCR4-NOT transcription complex subunit 2	Cluster 1; R_up_day	Cluster 1; R_up_night	Regulation overview.Regulation of gene expression.Regulation of transcription	Metabolism.Primary metabolism.Nucleobase, nucleoside, nucleotide, nucleic acid metabolism.Nucleic acid metabolism.RNA metabolism.RNA catabolism
VIT_12s0055g00060	UDP-glycosyltransferase 71A13	Cluster 1; R_up_day	Cluster 1; R_up_night	Metabolism.Primary metabolism.Carbohydrate metabolism.Glycosyl transference
VIT_12s0055g00340	WRKY DNA-binding protein 9	Cluster 1; R_up_day	Cluster 1; R_up_night	Regulation overview.Regulation of gene expression.Regulation of transcription.Transcription factor.WRKY family transcription factor
VIT_12s0055g00730	ATATH2 (ABC2 homolog 2)	Cluster 1; R_up_day	Cluster 1; R_up_night	Transport overview.Macromolecule transport.Multidrug transport.Multidrug ABC transport
VIT_12s0055g00800	Arachidonic acid-induced DEA1	Cluster 1; R_up_day	Cluster 1; R_up_night	Unknown
VIT_12s0055g00920	Aspartate aminotransferase	Cluster 1; R_up_day	Cluster 1; R_up_night	Metabolism.Primary metabolism.Amino acid metabolism.Alanine and aspartate metabolism	Metabolism.Primary metabolism.Amino acid metabolism.Cysteine metabolism	Metabolism.Primary metabolism.Amino acid metabolism.Arginine and proline metabolism	Metabolism.Primary metabolism.Amino acid metabolism.Aromatic amino acid metabolism.Tyrosine metabolism	Metabolism.Primary metabolism.Amino acid metabolism.Aromatic amino acid metabolism.Phenylalanine metabolism.Phenylalanine biosynthesis	Metabolism.Primary metabolism.Amino acid metabolism.Aromatic amino acid metabolism.Aromatic amino acid biosynthesis	Metabolism.Primary metabolism.Carbon fixation	Metabolism.Secondary metabolism.Primary amino acids derivated metabolism.Alkaloid metabolism
VIT_12s0055g01200	Secretory carrier membrane protein (SCAMP4)	Cluster 1; R_up_day	Cluster 1; R_up_night	Transport overview.Macromolecule transport.Protein transport.Protein coat	Cellular process.Cellular transport.Protein trafficking.Vesicle-mediated trafficking
VIT_12s0055g01260	Tubulin folding cofactor TITAN 1	Cluster 1; R_up_day	Cluster 1; R_up_night	Cellular process.Cellular component organization and biogenesis.Cytoskeleton organization and biogenesis.Microtubule organization and biogenesis
VIT_12s0057g00030	Ankyrin repeat protein	Cluster 1; R_up_day	Cluster 1; R_up_night	Diverse functions.Gene family with diverse functions.Ankyrin domain family
VIT_12s0057g00050	No hit	Cluster 1; R_up_day	Cluster 1; R_up_night	No hit
VIT_12s0057g00250	NDB3 (alternative NAD(P)H dehydrogenase 32)	Cluster 1; R_up_day	Cluster 1; R_up_night	Metabolism.Primary metabolism.Generation of metabolite precursors and energy.Electron transport.Respiratory-chain phosphorylation	Transport overview.Primary Active Transporters.Oxidoreduction-driven transporters.Proton-translocating NADH Dehydrogenase
VIT_12s0057g00310	Gamete expressed1 (GEX1)	Cluster 1; R_up_day	Cluster 1; R_up_night	Development.Reproductive development.Pollination-related
VIT_12s0057g00360	No hit	Cluster 1; R_up_day	Cluster 1; R_up_night	No hit
VIT_12s0057g00700	Glucan endo-1	Cluster 1; R_up_day	Cluster 1; R_up_night	Metabolism.Primary metabolism.Carbohydrate metabolism.Polysaccharide metabolism.Starch and sucrose metabolism	Metabolism.Primary metabolism.Carbohydrate metabolism.Polysaccharide metabolism.Beta-1,3 glucan metabolism.Beta-1,3 glucan catabolism
VIT_12s0057g00820	Leucine-rich repeat	Cluster 1; R_up_day	Cluster 1; R_up_night	Diverse functions.Gene family with diverse functions.NBS-LRR superfamily
VIT_12s0057g00990	Beta 1	Cluster 1; R_up_day	Cluster 1; R_up_night	Metabolism.Primary metabolism.Carbohydrate metabolism.Oligosaccharide metabolism.N-Glycan metabolism.N-Glycan biosynthesis	Metabolism.Primary metabolism.Carbohydrate metabolism.Oligosaccharide metabolism.Glycan metabolism.Glycan structures-biosynthesis1
VIT_12s0057g01150	AarF domain containing kinase	Cluster 1; R_up_day	Cluster 1; R_up_night	Signaling.Signaling pathway.Protein kinase
VIT_12s0057g01440	Heavy-metal-associated domain-containing protein	Cluster 1; R_up_day	Cluster 1; R_up_night	Unclear
VIT_12s0059g00020	No hit	Cluster 1; R_up_day	Cluster 1; R_up_night	No hit
VIT_12s0059g00320	EF hand	Cluster 1; R_up_day	Cluster 1; R_up_night	Signaling.Signaling pathway.Calcium sensors and Signaling
VIT_12s0059g00410	TAFII59 (TATA box associated factor II 59)	Cluster 1; R_up_day	Cluster 1; R_up_night	Metabolism.Primary metabolism.Nucleobase, nucleoside, nucleotide, nucleic acid metabolism.Nucleic acid metabolism.RNA metabolism.Basal transcription factors	Metabolism.Primary metabolism.Nucleobase, nucleoside, nucleotide, nucleic acid metabolism.Nucleic acid metabolism.RNA metabolism.RNA biosynthesis
VIT_12s0059g00470	Unknown protein	Cluster 1; R_up_day	Cluster 1; R_up_night	Unknown
VIT_12s0059g00490	Unknown	Cluster 1; R_up_day	Cluster 1; R_up_night	Unknown
VIT_12s0059g00500	No hit	Cluster 1; R_up_day	Cluster 1; R_up_night	No hit
VIT_12s0059g00740	Germin1	Cluster 1; R_up_day	Cluster 1; R_up_night	Metabolism.Primary metabolism.Generation of metabolite precursors and energy.Storage proteins
VIT_12s0059g00810	B-cell receptor-associated protein 31	Cluster 1; R_up_day	Cluster 1; R_up_night	Cellular process.Cell growth and death.Cell death.Apoptosis
VIT_12s0059g00850	Phosphatidylinositol 3- and 4-kinase / ubiquitin	Cluster 1; R_up_day	Cluster 1; R_up_night	Signaling.Signaling pathway.Protein kinase
VIT_12s0059g01120	CAF protein	Cluster 1; R_up_day	Cluster 1; R_up_night	Metabolism.Primary metabolism.Nucleobase, nucleoside, nucleotide, nucleic acid metabolism.Nucleic acid metabolism.RNA metabolism.RNA biosynthesis.mRNA biosynthesis
VIT_12s0059g01210	RNA-binding protein	Cluster 1; R_up_day	Cluster 1; R_up_night	Unknown
VIT_12s0059g01530	Unknown protein	Cluster 1; R_up_day	Cluster 1; R_up_night	Unknown
VIT_12s0059g01620	UPF0041	Cluster 1; R_up_day	Cluster 1; R_up_night	Unknown
VIT_12s0059g01720	No hit	Cluster 1; R_up_day	Cluster 1; R_up_night	No hit
VIT_12s0059g01990	No hit	Cluster 1; R_up_day	Cluster 1; R_up_night	No hit
VIT_12s0059g02200	No hit	Cluster 1; R_up_day	Cluster 1; R_up_night	No hit
VIT_12s0059g02240	Unknown	Cluster 1; R_up_day	Cluster 1; R_up_night	Unknown
VIT_12s0059g02510	Zinc finger (B-box type)	Cluster 1; R_up_day	Cluster 1; R_up_night	Regulation overview.Regulation of gene expression.Regulation of transcription.Transcription factor.Zinc finger B-box family transcription factor
VIT_12s0121g00040	No hit	Cluster 1; R_up_day	Cluster 1; R_up_night	No hit
VIT_12s0121g00270	No hit	Cluster 1; R_up_day	Cluster 1; R_up_night	No hit
VIT_12s0121g00370	NADH dehydrogenase (ubiquinone) flavoprotein 1	Cluster 1; R_up_day	Cluster 1; R_up_night	Metabolism.Primary metabolism.Generation of metabolite precursors and energy.Electron transport.Respiratory-chain phosphorylation	Transport overview.Primary Active Transporters.Oxidoreduction-driven transporters.Proton-translocating NADH Dehydrogenase
VIT_12s0121g00400	No hit	Cluster 1; R_up_day	Cluster 1; R_up_night	No hit
VIT_12s0121g00410	Ubiquitin-specific protease 12	Cluster 1; R_up_day	Cluster 1; R_up_night	Metabolism.Primary metabolism.Protein metabolism and modification.Proteolysis.cytoplasmic and nuclear protein degradation.Ubiquitin-mediated proteolysis
VIT_12s0134g00030	E-beta-ocimene synthase	Cluster 1; R_up_day	Cluster 1; R_up_night	Metabolism.Secondary metabolism.Terpenoid metabolism.Monoterpenoid metabolism.Monoterpenoid biosynthesis
VIT_12s0134g00350	Zinc finger (C3HC4-type ring finger)	Cluster 1; R_up_day	Cluster 1; R_up_night	Regulation overview.Regulation of gene expression.Regulation of transcription.Transcription factor.Zinc finger C3HC4 family transcription factor
VIT_12s0134g00410	frataxin protein	Cluster 1; R_up_day	Cluster 1; R_up_night	Transport overview.Incompletely characterized transport systems.Putative transport protein.Frataxin	Cellular process.Cellular component organization and biogenesis.Organelle organization and biogenesis.Mitochondrion organization and biogenesis
VIT_12s0142g00020	No hit	Cluster 1; R_up_day	Cluster 1; R_up_night	No hit
VIT_12s0142g00050	PUMILIO 7 (APUM7)	Cluster 1; R_up_day	Cluster 1; R_up_night	Regulation overview.Regulation of gene expression.Regulation of translation.Translation repression
VIT_12s0142g00110	Splicing factor	Cluster 1; R_up_day	Cluster 1; R_up_night	Metabolism.Primary metabolism.Nucleobase, nucleoside, nucleotide, nucleic acid metabolism.Nucleic acid metabolism.RNA metabolism.RNA processing.mRNA processing.mRNA splicing
VIT_12s0142g00160	Unknown protein	Cluster 1; R_up_day	Cluster 1; R_up_night	Unknown
VIT_12s0142g00430	Alternative oxidase 2	Cluster 1; R_up_day	Cluster 1; R_up_night	Signaling.Hormone Signaling.ABA Signaling.ABA-mediated Signaling pathway	Cellular process.Cellular homeostasis.Cell redox homeostasis
VIT_12s0178g00150	Unknown protein	Cluster 1; R_up_day	Cluster 1; R_up_night	Unknown
VIT_12s0178g00200	Actin beta/gamma 1	Cluster 1; R_up_day	Cluster 1; R_up_night	Cellular process.Cellular component organization and biogenesis.Cytoskeleton organization and biogenesis.Actin organization and biogenesis
VIT_13s0019g00110	Auxin response factor 1	Cluster 1; R_up_day	Cluster 1; R_up_night	Signaling.Hormone Signaling.Auxin Signaling.Auxin-mediated Signaling pathway	Regulation overview.Regulation of gene expression.Regulation of transcription.Transcription factor.ARF family transcription factor
VIT_13s0019g00300	Sensitivity to red light reduced protein (SRR1)	Cluster 1; R_up_day	Cluster 1; R_up_night	Signaling.Signaling pathway.Circadian clock Signaling
VIT_13s0019g00400	Unknown	Cluster 1; R_up_day	Cluster 1; R_up_night	Unknown
VIT_13s0019g00410	No hit	Cluster 1; R_up_day	Cluster 1; R_up_night	No hit
VIT_13s0019g00930	Heat shock protein 70	Cluster 1; R_up_day	Cluster 1; R_up_night	Metabolism.Primary metabolism.Protein metabolism and modification.Protein folding.Chaperone-mediated protein folding.HSP-mediated protein folding	Metabolism.Primary metabolism.Nucleobase, nucleoside, nucleotide, nucleic acid metabolism.Nucleic acid metabolism.RNA metabolism.RNA processing.mRNA processing.mRNA splicing	Transport overview.Channels and pores.a-Type channels.Cation Channel-forming Heat Shock Protein-70	Response to stimulus.Stress response.Abiotic stress response.Temperature stress response	Metabolism.Primary metabolism.Protein metabolism and modification.Protein processing in endoplasmic reticulum
VIT_13s0019g00980	GTP binding protein	Cluster 1; R_up_day	Cluster 1; R_up_night	Unknown
VIT_13s0019g01100	Unknown protein	Cluster 1; R_up_day	Cluster 1; R_up_night	Unknown
VIT_13s0019g01130	DC1 domain-containing protein	Cluster 1; R_up_day	Cluster 1; R_up_night	Unknown
VIT_13s0019g01280	DC1 domain-containing protein	Cluster 1; R_up_day	Cluster 1; R_up_night	Unknown
VIT_13s0019g01790	Scarecrow transcription factor 14 (SCL14)	Cluster 1; R_up_day	Cluster 1; R_up_night	Regulation overview.Regulation of gene expression.Regulation of transcription.Transcription factor.GRAS family transcription factor
VIT_13s0019g01810	Scarecrow transcription factor 14 (SCL14)	Cluster 1; R_up_day	Cluster 1; R_up_night	Regulation overview.Regulation of gene expression.Regulation of transcription.Transcription factor.GRAS family transcription factor
VIT_13s0019g02100	No hit	Cluster 1; R_up_day	Cluster 1; R_up_night	No hit
VIT_13s0019g02110	fringe-related protein	Cluster 1; R_up_day	Cluster 1; R_up_night	Unclear
VIT_13s0019g02200	Protein phosphatase 2CA AHG3 PP2CA	Cluster 1; R_up_day	Cluster 1; R_up_night	Signaling.Hormone Signaling.ABA Signaling.ABA-mediated Signaling pathway	Signaling.Signaling pathway.Protein phosphatase
VIT_13s0019g02660	Unknown protein	Cluster 1; R_up_day	Cluster 1; R_up_night	Unknown
VIT_13s0019g03030	Chaperone	Cluster 1; R_up_day	Cluster 1; R_up_night	Metabolism.Primary metabolism.Protein metabolism and modification.Protein folding.Chaperone-mediated protein folding
VIT_13s0019g03050	Heat shock protein 17.6 kDa class I	Cluster 1; R_up_day	Cluster 1; R_up_night	Metabolism.Primary metabolism.Protein metabolism and modification.Protein folding.Chaperone-mediated protein folding.HSP-mediated protein folding	Response to stimulus.Stress response.Abiotic stress response.Temperature stress response	Metabolism.Primary metabolism.Protein metabolism and modification.Protein processing in endoplasmic reticulum
VIT_13s0019g03070	Heat shock protein 17.6 kDa class I	Cluster 1; R_up_day	Cluster 1; R_up_night	Metabolism.Primary metabolism.Protein metabolism and modification.Protein folding.Chaperone-mediated protein folding.HSP-mediated protein folding	Response to stimulus.Stress response.Abiotic stress response.Temperature stress response	Metabolism.Primary metabolism.Protein metabolism and modification.Protein processing in endoplasmic reticulum
VIT_13s0019g03220	Proline transporter 1 (ProT1)	Cluster 1; R_up_day	Cluster 1; R_up_night	Transport overview.Electrochemical Potential-driven Transporters.Porters.Amino Acid/Auxin Permease	Transport overview.Macromolecule transport.Amino acid transport
VIT_13s0019g03340	No hit	Cluster 1; R_up_day	Cluster 1; R_up_night	No hit
VIT_13s0019g03420	C2 domain-containing protein	Cluster 1; R_up_day	Cluster 1; R_up_night	Signaling.Signaling pathway.Protein kinase
VIT_13s0019g03660	Unknown protein	Cluster 1; R_up_day	Cluster 1; R_up_night	Unknown
VIT_13s0019g03710	Lateral organ boundaries protein 1	Cluster 1; R_up_day	Cluster 1; R_up_night	Regulation overview.Regulation of gene expression.Regulation of transcription.Transcription factor.AS2 family transcription factor
VIT_13s0019g03760	Lateral organ boundaries protein 11	Cluster 1; R_up_day	Cluster 1; R_up_night	Regulation overview.Regulation of gene expression.Regulation of transcription.Transcription factor.AS2 family transcription factor
VIT_13s0019g03800	Lateral organ boundaries protein 1	Cluster 1; R_up_day	Cluster 1; R_up_night	Regulation overview.Regulation of gene expression.Regulation of transcription.Transcription factor.AS2 family transcription factor
VIT_13s0019g03830	Lateral organ boundaries protein 11	Cluster 1; R_up_day	Cluster 1; R_up_night	Regulation overview.Regulation of gene expression.Regulation of transcription.Transcription factor.AS2 family transcription factor
VIT_13s0019g03990	Unknown protein	Cluster 1; R_up_day	Cluster 1; R_up_night	Unknown
VIT_13s0019g04020	CTP synthase	Cluster 1; R_up_day	Cluster 1; R_up_night	Metabolism.Primary metabolism.Nucleobase, nucleoside, nucleotide, nucleic acid metabolism.Nucleotide metabolism.Pyrimidine metabolism
VIT_13s0019g04290	No hit	Cluster 1; R_up_day	Cluster 1; R_up_night	No hit
VIT_13s0019g04570	GCN5 N-acetyltransferase (GNAT)	Cluster 1; R_up_day	Cluster 1; R_up_night	Regulation overview.Regulation of gene expression.Regulation of transcription.Transcription factor.GNAT
VIT_13s0019g04730	Glycerol-3-phosphate dehydrogenase	Cluster 1; R_up_day	Cluster 1; R_up_night	Metabolism.Primary metabolism.Lipid metabolism.Glycerolipid metabolism.Glycerophospholipid metabolism.Glycerophospholipid biosynthesis	Metabolism.Primary metabolism.Organic acid metabolism.Butanoate metabolism	Metabolism.Primary metabolism.Carbohydrate metabolism.Glycerol-3-P shuttle
VIT_13s0019g04900	Pectate lyase	Cluster 1; R_up_day	Cluster 1; R_up_night	Cellular process.Cellular component organization and biogenesis.Cell wall organization and biogenesis.Cell wall metabolism.Cell wall catabolism.Pectin catabolism
VIT_13s0019g05010	Nodulin-like protein	Cluster 1; R_up_day	Cluster 1; R_up_night	Response to stimulus.Stress response.Biotic stress response
VIT_13s0019g05050	Nodulin-like protein	Cluster 1; R_up_day	Cluster 1; R_up_night	Response to stimulus.Stress response.Biotic stress response
VIT_13s0019g05070	Nodulin family protein	Cluster 1; R_up_day	Cluster 1; R_up_night	Metabolism.Primary metabolism.Protein metabolism and modification.Protein modification.Protein myristoylation	Metabolism.Cellular metabolism.Nitrogen and sulfur metabolism.Nitrogen metabolism.Nitrogen assimilation
VIT_13s0019g05110	Amino acid binding protein	Cluster 1; R_up_day	Cluster 1; R_up_night	Unclear
VIT_13s0019g05210	RNA recognition motif (RRM)-containing protein	Cluster 1; R_up_day	Cluster 1; R_up_night	Unknown
VIT_13s0019g05220	No hit	Cluster 1; R_up_day	Cluster 1; R_up_night	No hit
VIT_13s0019g05280	RAB GTPase RAB_ALPHA	Cluster 1; R_up_day	Cluster 1; R_up_night	Cellular process.Cellular transport.Protein trafficking.Vesicle-mediated trafficking	Signaling.Signaling pathway.G-protein signaling pathway.RAB-GTPase regulation
VIT_13s0047g00230	Pectinesterase family	Cluster 1; R_up_day	Cluster 1; R_up_night	Cellular process.Cellular component organization and biogenesis.Cell wall organization and biogenesis.Cell wall metabolism.Cell wall modification.Pectin modification
VIT_13s0047g00400	WD-40 repeat family protein / beige-related	Cluster 1; R_up_day	Cluster 1; R_up_night	Unknown
VIT_13s0047g00420	Methyl-CPG-binding Domain 9 MBD9	Cluster 1; R_up_day	Cluster 1; R_up_night	Development.Reproductive development.Flower development	Regulation overview.Regulation of gene expression.Regulation of transcription.Transcription factor.PHD family transcription factor	Cellular process.Cellular component organization and biogenesis.Nucleus.Chromosome organization and biogenesis.Chromatin organization	Regulation overview.Regulation of gene expression.Epigenetic regulation of gene expression
VIT_13s0047g00840	Serine hydroxymethyltransferase 3	Cluster 1; R_up_day	Cluster 1; R_up_night	Metabolism.Primary metabolism.Amino acid metabolism.Glycine, serine, and threonine metabolism	Metabolism.Cellular metabolism.One-carbon metabolism	Metabolism.Cellular metabolism.Methane metabolism	Metabolism.Primary metabolism.Coenzyme and prosthetic group metabolism.Folate metabolism
VIT_13s0047g00850	N2	Cluster 1; R_up_day	Cluster 1; R_up_night	Metabolism.Primary metabolism.Amino acid metabolism.Methionine metabolism
VIT_13s0047g01130	Zfwd2 protein (ZFWD2)	Cluster 1; R_up_day	Cluster 1; R_up_night	Regulation overview.Regulation of gene expression.Regulation of transcription.Transcription factor.C3H family transcription factor
VIT_13s0047g01210	Phospholipid-translocating ATPase ALA1	Cluster 1; R_up_day	Cluster 1; R_up_night	Transport overview.Primary Active Transporters.P-P-bond hydrolysis-driven transporters.P-type ATPase (P-ATPase).phospholipid transporting	Transport overview.Macromolecule transport.Lipid transport
VIT_13s0047g01230	flavonoid 1-2 rhamnosyltransferase	Cluster 1; R_up_day	Cluster 1; R_up_night	Metabolism.Secondary metabolism.Phenylpropanoid metabolism.Flavonoid metabolism.Flavonoid biosynthesis
VIT_13s0064g00230	No hit	Cluster 1; R_up_day	Cluster 1; R_up_night	No hit
VIT_13s0064g00510	No hit	Cluster 1; R_up_day	Cluster 1; R_up_night	No hit
VIT_13s0064g00700	Unknown	Cluster 1; R_up_day	Cluster 1; R_up_night	Unknown
VIT_13s0064g00710	No hit	Cluster 1; R_up_day	Cluster 1; R_up_night	No hit
VIT_13s0064g01100	No hit	Cluster 1; R_up_day	Cluster 1; R_up_night	No hit
VIT_13s0064g01110	No hit	Cluster 1; R_up_day	Cluster 1; R_up_night	No hit
VIT_13s0064g01120	No hit	Cluster 1; R_up_day	Cluster 1; R_up_night	No hit
VIT_13s0064g01460	No hit	Cluster 1; R_up_day	Cluster 1; R_up_night	No hit
VIT_13s0064g01810	No hit	Cluster 1; R_up_day	Cluster 1; R_up_night	No hit
VIT_13s0064g01820	AP2-associated kinase	Cluster 1; R_up_day	Cluster 1; R_up_night	Signaling.Signaling pathway.Protein kinase
VIT_13s0067g00530	Cinnamyl alcohol dehydrogenase	Cluster 1; R_up_day	Cluster 1; R_up_night	Metabolism.Secondary metabolism.Phenylpropanoid metabolism.Phenylpropanoid biosynthesis
VIT_13s0067g00660	Steroid 23-alpha-hydroxylase	Cluster 1; R_up_day	Cluster 1; R_up_night	Signaling.Hormone Signaling.Brassinosteroid Signaling.Brassinosteroid metabolism.Brassinosteroid biosynthesis	Metabolism.Primary metabolism.Lipid metabolism.Steroid metabolism
VIT_13s0067g00680	Cinnamyl alcohol dehydrogenase	Cluster 1; R_up_day	Cluster 1; R_up_night	Metabolism.Secondary metabolism.Phenylpropanoid metabolism.Phenylpropanoid biosynthesis
VIT_13s0067g00700	Hydrolase	Cluster 1; R_up_day	Cluster 1; R_up_night	Unknown
VIT_13s0067g00720	AarF domain containing kinase	Cluster 1; R_up_day	Cluster 1; R_up_night	Signaling.Signaling pathway.Protein kinase
VIT_13s0067g00870	Peptidyl-prolyl cis-trans isomerase ROC7 (rotamase CyP 7)	Cluster 1; R_up_day	Cluster 1; R_up_night	Metabolism.Primary metabolism.Protein metabolism and modification.Protein folding.Peptidyl prolyl isomerase-mediated protein folding
VIT_13s0067g00930	ACR4 (Arabidopsis CRINKLY4)	Cluster 1; R_up_day	Cluster 1; R_up_night	Signaling.Signaling pathway.Calcium sensors and Signaling	Signaling.Signaling pathway.Protein kinase
VIT_13s0067g01100	RPM1 (resistance to p. syringae pv maculicola 1)	Cluster 1; R_up_day	Cluster 1; R_up_night	Response to stimulus.Stress response.Biotic stress response.Plant-pathogen interaction
VIT_13s0067g01310	R protein disease resistance protein	Cluster 1; R_up_day	Cluster 1; R_up_night	Response to stimulus.Stress response.Biotic stress response.Plant-pathogen interaction.R proteins from Plant-pathogen interaction
VIT_13s0067g01650	Glutaredoxin	Cluster 1; R_up_day	Cluster 1; R_up_night	Response to stimulus.Stress response.Abiotic stress response.Oxidative stress response
VIT_13s0067g01700	Steroid 5alpha-reductase	Cluster 1; R_up_day	Cluster 1; R_up_night	Signaling.Hormone Signaling.Brassinosteroid Signaling.Brassinosteroid metabolism.Brassinosteroid biosynthesis	Metabolism.Primary metabolism.Lipid metabolism.Steroid metabolism
VIT_13s0067g01730	Steroid 5alpha-reductase	Cluster 1; R_up_day	Cluster 1; R_up_night	Signaling.Hormone Signaling.Brassinosteroid Signaling.Brassinosteroid metabolism.Brassinosteroid biosynthesis	Metabolism.Primary metabolism.Lipid metabolism.Steroid metabolism
VIT_13s0067g01810	No hit	Cluster 1; R_up_day	Cluster 1; R_up_night	No hit
VIT_13s0067g02090	Unknown protein	Cluster 1; R_up_day	Cluster 1; R_up_night	Unknown
VIT_13s0067g02500	Xanthine/uracil permease	Cluster 1; R_up_day	Cluster 1; R_up_night	Transport overview.Electrochemical Potential-driven Transporters.Porters.Major Facilitator Superfamily.Purine Transporter, AzgA	Transport overview.Macromolecule transport.Nucleotide transport
VIT_13s0067g02590	No hit	Cluster 1; R_up_day	Cluster 1; R_up_night	No hit
VIT_13s0067g02630	No hit	Cluster 1; R_up_day	Cluster 1; R_up_night	No hit
VIT_13s0067g02720	Cytochrome P450	Cluster 1; R_up_day	Cluster 1; R_up_night	Metabolism.Secondary metabolism.Primary amino acids derivated metabolism.Glucosinolate metabolism	Metabolism.Cellular metabolism.Oxidation reduction.Cytochrome P450 oxidoreductase
VIT_13s0067g02890	Unknown protein	Cluster 1; R_up_day	Cluster 1; R_up_night	Unknown
VIT_13s0067g03210	AarF domain containing kinase 1	Cluster 1; R_up_day	Cluster 1; R_up_night	Signaling.Signaling pathway.Protein kinase
VIT_13s0067g03260	Pheophorbidase	Cluster 1; R_up_day	Cluster 1; R_up_night	Metabolism.Primary metabolism.Cofactor metabolism.Tetrapyrrole metabolism.Chlorophyll metabolism.Chlorophyll catabolism
VIT_13s0067g03280	Inorganic phosphate transporter 1-3	Cluster 1; R_up_day	Cluster 1; R_up_night	Transport overview.Electrochemical Potential-driven Transporters.Porters.Major Facilitator Superfamily.Phosphate: H+ Symporter	Transport overview.Ion transport.Anion transport.Phosphate transport
VIT_13s0067g03530	Nitrilase	Cluster 1; R_up_day	Cluster 1; R_up_night	Metabolism.Cellular metabolism.Nitrogen and sulfur metabolism.Nitrogen metabolism	Signaling.Hormone Signaling.Auxin Signaling.Auxin metabolism
VIT_13s0067g03660	Unknown protein	Cluster 1; R_up_day	Cluster 1; R_up_night	Unknown
VIT_13s0067g03710	Unknown	Cluster 1; R_up_day	Cluster 1; R_up_night	Unknown
VIT_13s0073g00040	Glycine-rich protein	Cluster 1; R_up_day	Cluster 1; R_up_night	Unknown
VIT_13s0073g00210	WD-40 repeat family protein / beige-related	Cluster 1; R_up_day	Cluster 1; R_up_night	Unknown
VIT_13s0073g00220	WD-40 repeat family protein / beige-related	Cluster 1; R_up_day	Cluster 1; R_up_night	Unknown
VIT_13s0073g00290	Proline transporter 1 (ProT1)	Cluster 1; R_up_day	Cluster 1; R_up_night	Transport overview.Electrochemical Potential-driven Transporters.Porters.Amino Acid/Auxin Permease	Transport overview.Macromolecule transport.Amino acid transport
VIT_13s0073g00320	Poly(A) polymerase	Cluster 1; R_up_day	Cluster 1; R_up_night	Metabolism.Primary metabolism.Nucleobase, nucleoside, nucleotide, nucleic acid metabolism.Nucleic acid metabolism.RNA metabolism.RNA catabolism
VIT_13s0073g00440	BSU1-like protein 3 BSL3	Cluster 1; R_up_day	Cluster 1; R_up_night	Signaling.Hormone Signaling.Brassinosteroid Signaling.Brassinosteroid-mediated Signaling pathway
VIT_13s0073g00490	Serine/threonine-protein phosphatase BSL3	Cluster 1; R_up_day	Cluster 1; R_up_night	Signaling.Hormone Signaling.Brassinosteroid Signaling.Brassinosteroid-mediated Signaling pathway	Signaling.Signaling pathway.Protein phosphatase
VIT_13s0074g00050	DNA binding	Cluster 1; R_up_day	Cluster 1; R_up_night	Metabolism.Primary metabolism.Nucleobase, nucleoside, nucleotide, nucleic acid metabolism.Nucleic acid metabolism.DNA metabolism
VIT_13s0074g00070	Strictosidine synthase	Cluster 1; R_up_day	Cluster 1; R_up_night	Metabolism.Secondary metabolism.Terpenoid metabolism.Terpenoid biosynthesis	Metabolism.Secondary metabolism.Terpenoid metabolism.Monoterpenoid metabolism.Monoterpenoid biosynthesis	Metabolism.Secondary metabolism.Primary amino acids derivated metabolism.Alkaloid metabolism.Alkaloid biosynthesis.Monoterpenoid indole alkaloid metabolism.Monoterpenoid indole alkaloid biosynthesis
VIT_13s0074g00080	Strictosidine synthase	Cluster 1; R_up_day	Cluster 1; R_up_night	Metabolism.Secondary metabolism.Terpenoid metabolism.Terpenoid biosynthesis	Metabolism.Secondary metabolism.Terpenoid metabolism.Monoterpenoid metabolism.Monoterpenoid biosynthesis	Metabolism.Secondary metabolism.Primary amino acids derivated metabolism.Alkaloid metabolism.Alkaloid biosynthesis.Monoterpenoid indole alkaloid metabolism.Monoterpenoid indole alkaloid biosynthesis
VIT_13s0074g00210	Pyruvate kinase	Cluster 1; R_up_day	Cluster 1; R_up_night	Metabolism.Primary metabolism.Carbohydrate metabolism.Glycolysis Gluconeogenesis.Glycolysis	Metabolism.Primary metabolism.Nucleobase, nucleoside, nucleotide, nucleic acid metabolism.Nucleotide metabolism.Purine metabolism	Metabolism.Primary metabolism.Carbohydrate metabolism.Monosaccharide metabolism.Pyruvate metabolism	Metabolism.Primary metabolism.Carbon fixation
VIT_13s0074g00250	No hit	Cluster 1; R_up_day	Cluster 1; R_up_night	No hit
VIT_13s0074g00260	IK cytokine	Cluster 1; R_up_day	Cluster 1; R_up_night	Metabolism.Primary metabolism.Nucleobase, nucleoside, nucleotide, nucleic acid metabolism.Nucleic acid metabolism.RNA metabolism.RNA processing.mRNA processing.mRNA splicing
VIT_13s0074g00330	No hit	Cluster 1; R_up_day	Cluster 1; R_up_night	No hit
VIT_13s0074g00340	Unknown	Cluster 1; R_up_day	Cluster 1; R_up_night	Unknown
VIT_13s0074g00490	No hit	Cluster 1; R_up_day	Cluster 1; R_up_night	No hit
VIT_13s0074g00530	No hit	Cluster 1; R_up_day	Cluster 1; R_up_night	No hit
VIT_13s0074g00570	Gamma-aminobutyric acid transporter	Cluster 1; R_up_day	Cluster 1; R_up_night	Transport overview.Electrochemical Potential-driven Transporters.Porters.Amino Acid/Auxin Permease	Transport overview.Macromolecule transport.Amino acid transport
VIT_13s0074g00720	Neutral/alkaline invertase	Cluster 1; R_up_day	Cluster 1; R_up_night	Metabolism.Primary metabolism.Carbohydrate metabolism.Monosaccharide metabolism.Galactose metabolism	Metabolism.Primary metabolism.Carbohydrate metabolism.Polysaccharide metabolism.Starch and sucrose metabolism.Sucrose catabolism
VIT_13s0074g00800	CCHC-type integrase	Cluster 1; R_up_day	Cluster 1; R_up_night	Transposable elements viral and plasmid proteins.Protein from transposable element
VIT_13s0084g00240	Steroid sulfotransferase	Cluster 1; R_up_day	Cluster 1; R_up_night	Metabolism.single reactions	Metabolism.Primary metabolism.Lipid metabolism.Steroid metabolism.Steroid modification
VIT_13s0084g00340	Unknown protein	Cluster 1; R_up_day	Cluster 1; R_up_night	Unknown
VIT_13s0084g00840	No hit	Cluster 1; R_up_day	Cluster 1; R_up_night	No hit
VIT_13s0101g00010	ABC transporter F member 2	Cluster 1; R_up_day	Cluster 1; R_up_night	Transport overview.Macromolecule transport.Multidrug transport.Multidrug ABC transport
VIT_13s0101g00140	No hit	Cluster 1; R_up_day	Cluster 1; R_up_night	No hit
VIT_13s0101g00330	Phenylacetaldehyde reductase	Cluster 1; R_up_day	Cluster 1; R_up_night	Metabolism.Primary metabolism.Amino acid metabolism.Aromatic amino acid metabolism.Phenylalanine metabolism.Phenylalanine biosynthesis
VIT_13s0101g00400	No hit	Cluster 1; R_up_day	Cluster 1; R_up_night	No hit
VIT_13s0106g00160	C2 domain-containing protein	Cluster 1; R_up_day	Cluster 1; R_up_night	Signaling.Signaling pathway.Protein kinase
VIT_13s0106g00270	No hit	Cluster 1; R_up_day	Cluster 1; R_up_night	No hit
VIT_13s0106g00280	Cytochrome P450	Cluster 1; R_up_day	Cluster 1; R_up_night	Metabolism.Secondary metabolism.Primary amino acids derivated metabolism.Glucosinolate metabolism	Metabolism.Cellular metabolism.Oxidation reduction.Cytochrome P450 oxidoreductase
VIT_13s0106g00360	Non-symbiotic hemoglobin class 1	Cluster 1; R_up_day	Cluster 1; R_up_night	Metabolism.Primary metabolism.Cofactor metabolism.Tetrapyrrole metabolism	Transport overview.Gaseous transport.Oxygen transport
VIT_13s0106g00420	Metalloendopeptidase	Cluster 1; R_up_day	Cluster 1; R_up_night	Metabolism.Primary metabolism.Protein metabolism and modification.Proteolysis.Peptidase-mediated proteolysis.Metallopeptidase-mediated proteolysis
VIT_13s0106g00510	Maternal effect embryo arrest 5	Cluster 1; R_up_day	Cluster 1; R_up_night	Metabolism.Primary metabolism.Nucleobase, nucleoside, nucleotide, nucleic acid metabolism.Nucleic acid metabolism.RNA metabolism.RNA processing.mRNA processing.mRNA splicing	Metabolism.Primary metabolism.Protein metabolism and modification.Protein folding
VIT_13s0147g00030	Male germ cell-associated kinase	Cluster 1; R_up_day	Cluster 1; R_up_night	Signaling.Signaling pathway.Protein kinase
VIT_13s0147g00080	ATPase-like domain-containing	Cluster 1; R_up_day	Cluster 1; R_up_night	Unclear
VIT_13s0147g00120	TIR-NBS-LRR-TIR disease resistance protein	Cluster 1; R_up_day	Cluster 1; R_up_night	Diverse functions.Gene family with diverse functions.NBS-LRR superfamily	Response to stimulus.Stress response.Biotic stress response
VIT_13s0147g00150	TIR-NBS-LRR-TIR disease resistance protein	Cluster 1; R_up_day	Cluster 1; R_up_night	Diverse functions.Gene family with diverse functions.NBS-LRR superfamily	Response to stimulus.Stress response.Biotic stress response
VIT_13s0147g00200	L-aminoadipate-semialdehyde dehydrogenase-phosphopantetheinyltransferase	Cluster 1; R_up_day	Cluster 1; R_up_night	Metabolism.Primary metabolism.Amino acid metabolism.Lysine metabolism
VIT_13s0156g00260	Homeobox-leucine zipper protein HAT14	Cluster 1; R_up_day	Cluster 1; R_up_night	Regulation overview.Regulation of gene expression.Regulation of transcription.Transcription factor.Homeobox domain family transcription factor
VIT_13s0156g00550	S-receptor kinase	Cluster 1; R_up_day	Cluster 1; R_up_night	Signaling.Signaling pathway.Protein kinase
VIT_13s0156g00580	S-receptor kinase	Cluster 1; R_up_day	Cluster 1; R_up_night	Signaling.Signaling pathway.Protein kinase
VIT_13s0156g00590	S-receptor kinase	Cluster 1; R_up_day	Cluster 1; R_up_night	Signaling.Signaling pathway.Protein kinase
VIT_13s0156g00610	S-receptor kinase	Cluster 1; R_up_day	Cluster 1; R_up_night	Signaling.Signaling pathway.Protein kinase
VIT_13s0156g00620	S-receptor kinase	Cluster 1; R_up_day	Cluster 1; R_up_night	Signaling.Signaling pathway.Protein kinase
VIT_13s0156g00630	S-receptor kinase	Cluster 1; R_up_day	Cluster 1; R_up_night	Signaling.Signaling pathway.Protein kinase
VIT_13s0158g00130	Lactoylglutathione lyase	Cluster 1; R_up_day	Cluster 1; R_up_night	Metabolism.Primary metabolism.Carbohydrate metabolism.Monosaccharide metabolism.Pyruvate metabolism	Metabolism.Primary metabolism.Organic acid metabolism.Pyruvate fermentation	Response to stimulus.Stress response.Abiotic stress response.Oxidative stress response
VIT_13s0158g00200	R protein MLA10	Cluster 1; R_up_day	Cluster 1; R_up_night	Response to stimulus.Stress response.Biotic stress response.Plant-pathogen interaction.R proteins from Plant-pathogen interaction
VIT_13s0158g00230	IMP dehydrogenase/GMP reductase	Cluster 1; R_up_day	Cluster 1; R_up_night	Metabolism.Primary metabolism.Nucleobase, nucleoside, nucleotide, nucleic acid metabolism.Nucleotide metabolism.Purine metabolism
VIT_13s0158g00250	No hit	Cluster 1; R_up_day	Cluster 1; R_up_night	No hit
VIT_13s0158g00310	NBS-LRR type disease resistance protein	Cluster 1; R_up_day	Cluster 1; R_up_night	Diverse functions.Gene family with diverse functions.NBS-LRR superfamily	Response to stimulus.Stress response.Biotic stress response
VIT_13s0175g00110	Unknown	Cluster 1; R_up_day	Cluster 1; R_up_night	Unknown
VIT_13s0320g00070	Myosin-like protein XIF	Cluster 1; R_up_day	Cluster 1; R_up_night	Cellular process.Cellular component organization and biogenesis.Cytoskeleton organization and biogenesis.Actin organization and biogenesis.Actin-driven movement
VIT_14s0006g00030	KH domain-containing protein	Cluster 1; R_up_day	Cluster 1; R_up_night	Unknown
VIT_14s0006g00180	Aspartyl protease	Cluster 1; R_up_day	Cluster 1; R_up_night	Metabolism.Primary metabolism.Protein metabolism and modification.Proteolysis.Peptidase-mediated proteolysis
VIT_14s0006g00230	Potassium channel SKOR	Cluster 1; R_up_day	Cluster 1; R_up_night	Transport overview.Channels and pores.a-Type channels.The Voltage-gated Ion Channel.K+ channel	Transport overview.Ion transport.Cation transport.Potassium transport
VIT_14s0006g00360	No hit	Cluster 1; R_up_day	Cluster 1; R_up_night	No hit
VIT_14s0006g00430	Carboxylesterase	Cluster 1; R_up_day	Cluster 1; R_up_night	Metabolism.Cellular metabolism.Esterase activity
VIT_14s0006g00580	Zinc finger (DHHC type)	Cluster 1; R_up_day	Cluster 1; R_up_night	Regulation overview.Regulation of gene expression.Regulation of transcription.Transcription factor.Zinc finger DHHC family transcription factor
VIT_14s0006g00840	No hit	Cluster 1; R_up_day	Cluster 1; R_up_night	No hit
VIT_14s0006g00880	Protein phosphatase 2C	Cluster 1; R_up_day	Cluster 1; R_up_night	Signaling.Signaling pathway.Protein phosphatase.PP2C
VIT_14s0006g00970	WD-40 repeat family protein / beige-related	Cluster 1; R_up_day	Cluster 1; R_up_night	Unknown
VIT_14s0006g01030	Calmodulin-binding heat-shock protein	Cluster 1; R_up_day	Cluster 1; R_up_night	Metabolism.Primary metabolism.Lipid metabolism.Glycerolipid metabolism.Glycerolipid catabolism	Signaling.Signaling pathway.Calcium sensors and Signaling
VIT_14s0006g01110	Unknown protein	Cluster 1; R_up_day	Cluster 1; R_up_night	Unknown
VIT_14s0006g01180	ATP-dependent RNA helicase A	Cluster 1; R_up_day	Cluster 1; R_up_night	Metabolism.Primary metabolism.Nucleobase, nucleoside, nucleotide, nucleic acid metabolism.Nucleic acid metabolism.RNA metabolism
VIT_14s0006g01270	No hit	Cluster 1; R_up_day	Cluster 1; R_up_night	No hit
VIT_14s0006g01290	Myb domain protein 113	Cluster 1; R_up_day	Cluster 1; R_up_night	Regulation overview.Regulation of gene expression.Regulation of transcription.Transcription factor.MYB family transcription factor
VIT_14s0006g01370	VTC2	Cluster 1; R_up_day	Cluster 1; R_up_night	Metabolism.Primary metabolism.Organic acid metabolism.Ascorbate and aldarate metabolism
VIT_14s0006g01510	No hit	Cluster 1; R_up_day	Cluster 1; R_up_night	No hit
VIT_14s0006g01530	Armadillo/beta-catenin repeat	Cluster 1; R_up_day	Cluster 1; R_up_night	Unknown
VIT_14s0006g01990	Translation initiation factor eIF-5	Cluster 1; R_up_day	Cluster 1; R_up_night	Metabolism.Primary metabolism.Protein metabolism and modification.Protein synthesis.Translation.Translational initiation	Transport overview.Macromolecule transport.RNA transport
VIT_14s0006g02000	No hit	Cluster 1; R_up_day	Cluster 1; R_up_night	No hit
VIT_14s0006g02070	Unknown	Cluster 1; R_up_day	Cluster 1; R_up_night	Unknown
VIT_14s0006g02090	Ankyrin protein kinase	Cluster 1; R_up_day	Cluster 1; R_up_night	Diverse functions.Gene family with diverse functions.Ankyrin domain family
VIT_14s0006g02180	ATP synthase beta chain 2	Cluster 1; R_up_day	Cluster 1; R_up_night	Metabolism.Primary metabolism.Generation of metabolite precursors and energy.Electron transport.Respiratory-chain phosphorylation	Transport overview.Primary Active Transporters.P-P-bond hydrolysis-driven transporters.H+ or Na+ trsloc F-t, V-t and A-t ATPase	Transport overview.Ion transport.Cation transport.Proton transport
VIT_14s0006g02240	2-hydroxyacyl-CoA lyase 1	Cluster 1; R_up_day	Cluster 1; R_up_night	Cellular process.Cellular component organization and biogenesis.Organelle organization and biogenesis.Peroxisome organization and biogenesis	Cellular process.Cellular transport
VIT_14s0006g02620	Cgi67 serine protease	Cluster 1; R_up_day	Cluster 1; R_up_night	Metabolism.Primary metabolism.Protein metabolism and modification.Proteolysis.Peptidase proteins
VIT_14s0006g02650	Receptor-like protein kinase	Cluster 1; R_up_day	Cluster 1; R_up_night	Signaling.Signaling pathway.Protein kinase
VIT_14s0006g02750	Peptidyl-tRNA hydrolase	Cluster 1; R_up_day	Cluster 1; R_up_night	Metabolism.Primary metabolism.Protein metabolism and modification.Protein synthesis.Translation
VIT_14s0006g02770	Proton-dependent oligopeptide transport (POT) family protein	Cluster 1; R_up_day	Cluster 1; R_up_night	Transport overview.Electrochemical Potential-driven Transporters.Porters.Proton-dependent Oligopeptide Transporter	Transport overview.Macromolecule transport.Oligopeptide transport
VIT_14s0006g02980	Senescence-associated protein	Cluster 1; R_up_day	Cluster 1; R_up_night	Unknown
VIT_14s0006g03050	Unknown protein	Cluster 1; R_up_day	Cluster 1; R_up_night	Unknown
VIT_14s0006g03290	Sugar transporter 1	Cluster 1; R_up_day	Cluster 1; R_up_night	Transport overview.Electrochemical Potential-driven Transporters.Porters.Major Facilitator Superfamily.Sugar Porter	Transport overview.Macromolecule transport.Carbohydrate transport.Sugar transport
VIT_14s0030g00500	Copine BON3 (BONZAI 3)	Cluster 1; R_up_day	Cluster 1; R_up_night	Diverse functions.Gene family with diverse functions.Copine family
VIT_14s0030g00550	Copine BON3 (BONZAI 3)	Cluster 1; R_up_day	Cluster 1; R_up_night	Diverse functions.Gene family with diverse functions.Copine family
VIT_14s0030g00560	Copine BON3 (BONZAI 3)	Cluster 1; R_up_day	Cluster 1; R_up_night	Diverse functions.Gene family with diverse functions.Copine family
VIT_14s0030g00570	Copine BON3 (BONZAI 3)	Cluster 1; R_up_day	Cluster 1; R_up_night	Diverse functions.Gene family with diverse functions.Copine family
VIT_14s0030g00600	Copine BON3 (BONZAI 3)	Cluster 1; R_up_day	Cluster 1; R_up_night	Diverse functions.Gene family with diverse functions.Copine family
VIT_14s0030g01080	No hit	Cluster 1; R_up_day	Cluster 1; R_up_night	No hit
VIT_14s0030g01230	No hit	Cluster 1; R_up_day	Cluster 1; R_up_night	No hit
VIT_14s0030g01390	Ribosome biogenesis protein Bms1	Cluster 1; R_up_day	Cluster 1; R_up_night	Cellular process.Cellular component organization and biogenesis.Ribosome organization and biogenesis
VIT_14s0030g01600	DNA-binding storekeeper protein	Cluster 1; R_up_day	Cluster 1; R_up_night	Regulation overview.Regulation of gene expression.Regulation of transcription.Transcription factor.GeBP family transcription factor
VIT_14s0030g01660	Serine/threonine kinase WNK1	Cluster 1; R_up_day	Cluster 1; R_up_night	Signaling.Signaling pathway.Circadian clock Signaling	Signaling.Signaling pathway.Protein kinase
VIT_14s0030g01730	No hit	Cluster 1; R_up_day	Cluster 1; R_up_night	No hit
VIT_14s0030g01740	Zeta-carotene desaturase ZDS1	Cluster 1; R_up_day	Cluster 1; R_up_night	Metabolism.Secondary metabolism.Terpenoid metabolism.Tetraterpenoid metabolism.Tetraterpenoid biosynthesis.Carotenoid biosynthesis
VIT_14s0030g02010	Auxin-induced protein PCNT115	Cluster 1; R_up_day	Cluster 1; R_up_night	Signaling.Hormone Signaling.Auxin Signaling.Auxin-mediated Signaling pathway	Signaling.Hormone Signaling.Auxin Signaling.Auxin responsive
VIT_14s0030g02020	Aldo/keto reductase	Cluster 1; R_up_day	Cluster 1; R_up_night	Metabolism.Primary metabolism.Carbohydrate metabolism.Monosaccharide metabolism.Pentose glucuronate interconversion	Metabolism.Primary metabolism.Carbohydrate metabolism.Monosaccharide metabolism.Fructose and mannose metabolism	Metabolism.Primary metabolism.Carbohydrate metabolism.Monosaccharide metabolism.Galactose metabolism	Metabolism.Primary metabolism.Lipid metabolism.Glycerolipid metabolism	Metabolism.Primary metabolism.Carbohydrate metabolism.Monosaccharide metabolism.Pyruvate metabolism	Metabolism.Primary metabolism.Carbohydrate metabolism.Carbohydrate oxidation reduction
VIT_14s0030g02040	Peptide chain release factor RF-1	Cluster 1; R_up_day	Cluster 1; R_up_night	Metabolism.Primary metabolism.Protein metabolism and modification.Protein synthesis.Translation.Translational termination
VIT_14s0030g02050	Auxin-induced protein PCNT115	Cluster 1; R_up_day	Cluster 1; R_up_night	Signaling.Hormone Signaling.Auxin Signaling.Auxin-mediated Signaling pathway	Signaling.Hormone Signaling.Auxin Signaling.Auxin responsive
VIT_14s0036g00090	No hit	Cluster 1; R_up_day	Cluster 1; R_up_night	No hit
VIT_14s0036g00210	CYP89A6	Cluster 1; R_up_day	Cluster 1; R_up_night	Metabolism.Cellular metabolism.Oxidation reduction.Cytochrome P450 oxidoreductase
VIT_14s0036g00310	RPS2 (resistant to p. syringae 2)	Cluster 1; R_up_day	Cluster 1; R_up_night	Response to stimulus.Stress response.Biotic stress response.Plant-pathogen interaction	Diverse functions.Gene family with diverse functions.NBS-LRR superfamily
VIT_14s0036g00320	No hit	Cluster 1; R_up_day	Cluster 1; R_up_night	No hit
VIT_14s0036g00380	Zinc finger nuclease 2	Cluster 1; R_up_day	Cluster 1; R_up_night	Regulation overview.Regulation of gene expression.Regulation of transcription.Transcription factor.C3H family transcription factor
VIT_14s0036g00560	Quinone oxidoreductase	Cluster 1; R_up_day	Cluster 1; R_up_night	Metabolism.Primary metabolism.Generation of metabolite precursors and energy.Electron transport.Respiratory-chain phosphorylation	Transport overview.Primary Active Transporters.Oxidoreduction-driven transporters.Proton-translocating NADH Dehydrogenase
VIT_14s0036g00580	Betaine aldehyde dehydrogenase	Cluster 1; R_up_day	Cluster 1; R_up_night	Metabolism.Primary metabolism.Amino acid metabolism.Glycine, serine, and threonine metabolism	Transport overview.Channels and pores.ß-Barrel porins.Outer Membrane Factor	Metabolism.Cellular metabolism.Amino acid derivative metabolism.Glycine betaine biosynthesis	Response to stimulus.Stress response.Abiotic stress response.Osmotic stress response
VIT_14s0036g00630	RNA binding motif protein 42	Cluster 1; R_up_day	Cluster 1; R_up_night	Unknown
VIT_14s0036g00890	UDP-N-acetylglucosamine--peptide N-acetylglucosaminyltransferase	Cluster 1; R_up_day	Cluster 1; R_up_night	Metabolism.Primary metabolism.Carbohydrate metabolism.Oligosaccharide metabolism.Glycan metabolism.Glycan structures-biosynthesis1	Metabolism.Primary metabolism.Protein metabolism and modification.Protein modification.Protein modification with sugar residues.N-glycosylation
VIT_14s0036g00910	UDP-N-acetylglucosamine--peptide N-acetylglucosaminyltransferase	Cluster 1; R_up_day	Cluster 1; R_up_night	Metabolism.Primary metabolism.Carbohydrate metabolism.Oligosaccharide metabolism.Glycan metabolism.Glycan structures-biosynthesis1	Metabolism.Primary metabolism.Protein metabolism and modification.Protein modification.Protein modification with sugar residues.N-glycosylation
VIT_14s0036g00930	Polyubiquitin (UBQ4)	Cluster 1; R_up_day	Cluster 1; R_up_night	Metabolism.Primary metabolism.Protein metabolism and modification.Proteolysis.cytoplasmic and nuclear protein degradation.Ubiquitin-mediated proteolysis
VIT_14s0036g00980	Transcription initiation factor TFIID subunit 10	Cluster 1; R_up_day	Cluster 1; R_up_night	Metabolism.Primary metabolism.Nucleobase, nucleoside, nucleotide, nucleic acid metabolism.Nucleic acid metabolism.RNA metabolism.Basal transcription factors	Metabolism.Primary metabolism.Nucleobase, nucleoside, nucleotide, nucleic acid metabolism.Nucleic acid metabolism.RNA metabolism.RNA biosynthesis
VIT_14s0036g00990	Polyubiquitin (UBQ4)	Cluster 1; R_up_day	Cluster 1; R_up_night	Metabolism.Primary metabolism.Protein metabolism and modification.Proteolysis.cytoplasmic and nuclear protein degradation.Ubiquitin-mediated proteolysis
VIT_14s0036g01050	Beta-D-glucosidase	Cluster 1; R_up_day	Cluster 1; R_up_night	Metabolism.Primary metabolism.Carbohydrate metabolism.Polysaccharide metabolism.Starch and sucrose metabolism	Metabolism.Secondary metabolism.Terpenoid metabolism.Monoterpenoid metabolism.Monoterpenoid biosynthesis	Cellular process.Cellular component organization and biogenesis.Cell wall organization and biogenesis.Cell wall metabolism.Cell wall modification.Beta-glucoside modification
VIT_14s0036g01220	Ribosomal protein L18P/L5E	Cluster 1; R_up_day	Cluster 1; R_up_night	Metabolism.Primary metabolism.Protein metabolism and modification.Protein synthesis.Ribosome
VIT_14s0036g01300	No hit	Cluster 1; R_up_day	Cluster 1; R_up_night	No hit
VIT_14s0036g01320	SOD Cu/Zn superoxide dismutase	Cluster 1; R_up_day	Cluster 1; R_up_night	Cellular process.Cellular component organization and biogenesis.Organelle organization and biogenesis.Peroxisome organization and biogenesis.Peroxisome membrane organization and biogenesis
VIT_14s0036g01400	Calmodulin-binding	Cluster 1; R_up_day	Cluster 1; R_up_night	Signaling.Signaling pathway.Calcium sensors and Signaling
VIT_14s0060g00010	Ribosomal protein L21	Cluster 1; R_up_day	Cluster 1; R_up_night	Metabolism.Primary metabolism.Protein metabolism and modification.Protein synthesis.Ribosome
VIT_14s0060g00070	No hit	Cluster 1; R_up_day	Cluster 1; R_up_night	No hit
VIT_14s0060g00160	Nuclear pore complex protein Nup98-Nup96	Cluster 1; R_up_day	Cluster 1; R_up_night	Transport overview.Incompletely characterized transport systems.Recognized transporters of unknown biochemical mechanism.Nuclear pore complex	Transport overview.Nucleocytoplasmic transport.Nuclear pore complex	Transport overview.Macromolecule transport.RNA transport
VIT_14s0060g00170	Nuclear pore complex protein Nup98-Nup96	Cluster 1; R_up_day	Cluster 1; R_up_night	Transport overview.Incompletely characterized transport systems.Recognized transporters of unknown biochemical mechanism.Nuclear pore complex	Transport overview.Nucleocytoplasmic transport.Nuclear pore complex	Transport overview.Macromolecule transport.RNA transport
VIT_14s0060g00270	Pentatricopeptide (PPR) repeat-containing	Cluster 1; R_up_day	Cluster 1; R_up_night	Diverse functions.Gene family with diverse functions.Pentatricopeptide domain family
VIT_14s0060g00420	Pyruvate dehydrogenase kinase	Cluster 1; R_up_day	Cluster 1; R_up_night	Metabolism.Primary metabolism.Carbohydrate metabolism.Glycolysis Gluconeogenesis.Pyruvate decarboxylation.Pyruvate decarboxylation inhibition	Metabolism.Primary metabolism.Amino acid metabolism.Alanine and aspartate metabolism	Metabolism.Primary metabolism.Amino acid metabolism.Valine, leucine, and isoleucine metabolism.Valine, leucine, and isoleucine biosynthesis	Metabolism.Primary metabolism.Carbohydrate metabolism.Monosaccharide metabolism.Pyruvate metabolism
VIT_14s0060g00530	No hit	Cluster 1; R_up_day	Cluster 1; R_up_night	No hit
VIT_14s0060g00560	Unknown protein	Cluster 1; R_up_day	Cluster 1; R_up_night	Unknown
VIT_14s0060g00700	Unknown	Cluster 1; R_up_day	Cluster 1; R_up_night	Unknown
VIT_14s0060g01260	Peptide chain release factor 2	Cluster 1; R_up_day	Cluster 1; R_up_night	Metabolism.Primary metabolism.Protein metabolism and modification.Protein synthesis.Translation.Translational termination
VIT_14s0060g01490	DnaJ homolog	Cluster 1; R_up_day	Cluster 1; R_up_night	Transport overview.Primary Active Transporters.P-P-bond hydrolysis-driven transporters.General Secretory Pathway (Sec)	Regulation overview.Regulation of gene expression.Regulation of transcription.Transcription factor.C2H2 family transcription factor	Metabolism.Primary metabolism.Protein metabolism and modification.Protein folding.Chaperone-mediated protein folding.HSP-mediated protein folding.HSP-mediated protein folding co-chaperone
VIT_14s0060g01530	DNA polymerase III subunit epsilon	Cluster 1; R_up_day	Cluster 1; R_up_night	Metabolism.Primary metabolism.Nucleobase, nucleoside, nucleotide, nucleic acid metabolism.Nucleic acid metabolism.DNA metabolism.DNA replication
VIT_14s0060g01640	Armadillo helical	Cluster 1; R_up_day	Cluster 1; R_up_night	Unknown
VIT_14s0060g01700	fumarase	Cluster 1; R_up_day	Cluster 1; R_up_night	Metabolism.Primary metabolism.Generation of metabolite precursors and energy.Citric acid cycle	Metabolism.Primary metabolism.Generation of metabolite precursors and energy.Reductive carboxylate cycle	Metabolism.Primary metabolism.Organic acid metabolism.Carboxylic acid metabolism
VIT_14s0060g01980	Unknown protein	Cluster 1; R_up_day	Cluster 1; R_up_night	Unknown
VIT_14s0060g01990	ATPP2-B15 (Phloem protein 2-B15)	Cluster 1; R_up_day	Cluster 1; R_up_night	Unclassified
VIT_14s0060g02100	Pentatricopeptide (PPR) repeat-containing	Cluster 1; R_up_day	Cluster 1; R_up_night	Diverse functions.Gene family with diverse functions.Pentatricopeptide domain family
VIT_14s0060g02130	No hit	Cluster 1; R_up_day	Cluster 1; R_up_night	No hit
VIT_14s0060g02170	Glutathione S-transferase GSTU8	Cluster 1; R_up_day	Cluster 1; R_up_night	Metabolism.Primary metabolism.Coenzyme and prosthetic group metabolism.Peptide derived compounds biosynthesis.Glutathione metabolism	Response to stimulus.Stress response.Abiotic stress response.Oxidative stress response
VIT_14s0060g02230	No hit	Cluster 1; R_up_day	Cluster 1; R_up_night	No hit
VIT_14s0066g00820	Unknown protein	Cluster 1; R_up_day	Cluster 1; R_up_night	Unknown
VIT_14s0066g01090	Myb domain protein 24	Cluster 1; R_up_day	Cluster 1; R_up_night	Regulation overview.Regulation of gene expression.Regulation of transcription.Transcription factor.MYB family transcription factor
VIT_14s0066g01140	Unknown protein	Cluster 1; R_up_day	Cluster 1; R_up_night	Unknown
VIT_14s0066g01150	Cinnamoyl-CoA reductase	Cluster 1; R_up_day	Cluster 1; R_up_night	Metabolism.Secondary metabolism.Phenylpropanoid metabolism.Phenylpropanoid biosynthesis	Metabolism.Secondary metabolism.Phenylpropanoid metabolism.Lignin metabolism.Lignin biosynthesis
VIT_14s0066g01210	Carbonic anhydrase	Cluster 1; R_up_day	Cluster 1; R_up_night	Metabolism.Primary metabolism.Amino acid metabolism.Histidine metabolism	Metabolism.Primary metabolism.Organic acid metabolism.Butanoate metabolism	Metabolism.Cellular metabolism.Nitrogen and sulfur metabolism.Nitrogen metabolism	Transport overview.Electrochemical Potential-driven Transporters.Porters.Sulfate Permease	Metabolism.Cellular metabolism.One-carbon metabolism
VIT_14s0066g01350	No hit	Cluster 1; R_up_day	Cluster 1; R_up_night	No hit
VIT_14s0066g01360	No hit	Cluster 1; R_up_day	Cluster 1; R_up_night	No hit
VIT_14s0066g01710	Leaf senescence protein	Cluster 1; R_up_day	Cluster 1; R_up_night	Development.Senescence
VIT_14s0066g01940	No hit	Cluster 1; R_up_day	Cluster 1; R_up_night	No hit
VIT_14s0066g01950	Metalloendoproteinase 1 precursor	Cluster 1; R_up_day	Cluster 1; R_up_night	Metabolism.Primary metabolism.Protein metabolism and modification.Proteolysis.Peptidase-mediated proteolysis.Metallopeptidase-mediated proteolysis
VIT_14s0066g02420	AAA-type ATPase	Cluster 1; R_up_day	Cluster 1; R_up_night	Diverse functions.Gene family with diverse functions.AAA-type ATPase domain family
VIT_14s0066g02470	Unknown protein	Cluster 1; R_up_day	Cluster 1; R_up_night	Unknown
VIT_14s0066g02680	Leucine-rich repeat protein kinase	Cluster 1; R_up_day	Cluster 1; R_up_night	Signaling.Signaling pathway.Protein kinase
VIT_14s0068g00390	Esterase PIR7B	Cluster 1; R_up_day	Cluster 1; R_up_night	Unclear
VIT_14s0068g00480	UDP-glucosyl transferase	Cluster 1; R_up_day	Cluster 1; R_up_night	Metabolism.Secondary metabolism.Phenylpropanoid metabolism.Flavonoid metabolism.Flavonoid biosynthesis	Metabolism.Primary metabolism.Carbohydrate metabolism.Glycosyl transference
VIT_14s0068g01250	Mitochondrial phosphate transporter	Cluster 1; R_up_day	Cluster 1; R_up_night	Transport overview.Electrochemical Potential-driven Transporters.Porters.Mitochondrial Carrier.Phosphate carrier	Transport overview.Mitochondrial membrane transport.Mitochondrial membrane phosphate transport
VIT_14s0068g01360	GEM-like protein 5	Cluster 1; R_up_day	Cluster 1; R_up_night	Cellular process.Cell growth and death
VIT_14s0068g01410	Acyltransferase	Cluster 1; R_up_day	Cluster 1; R_up_night	Unknown
VIT_14s0068g01740	ABCNAP14	Cluster 1; R_up_day	Cluster 1; R_up_night	Transport overview.Macromolecule transport.Multidrug transport.Multidrug ABC transport
VIT_14s0068g01760	Alcohol dehydrogenase	Cluster 1; R_up_day	Cluster 1; R_up_night	Metabolism.Primary metabolism.Carbohydrate metabolism.Glycolysis Gluconeogenesis	Metabolism.Primary metabolism.Lipid metabolism.Fatty acid metabolism	Metabolism.Primary metabolism.Amino acid metabolism.Aromatic amino acid metabolism.Tyrosine metabolism	Metabolism.Cellular metabolism.Oxidation reduction.Alcohol dehydrogenase superfamily
VIT_14s0068g01800	SEPALLATA3	Cluster 1; R_up_day	Cluster 1; R_up_night	Development.Reproductive development.Flower development	Regulation overview.Regulation of gene expression.Regulation of transcription.Transcription factor.MADS-box family transcription factor
VIT_14s0068g01930	Zinc finger (C2H2 type) family	Cluster 1; R_up_day	Cluster 1; R_up_night	Regulation overview.Regulation of gene expression.Regulation of transcription.Transcription factor.C2H2 family transcription factor
VIT_14s0068g02120	CYP94B3	Cluster 1; R_up_day	Cluster 1; R_up_night	Metabolism.Cellular metabolism.Oxidation reduction.Cytochrome P450 oxidoreductase
VIT_14s0068g02210	HcrVf1 protein	Cluster 1; R_up_day	Cluster 1; R_up_night	Diverse functions.Gene family with diverse functions.NBS-LRR superfamily	Response to stimulus.Stress response.Biotic stress response
VIT_14s0068g02240	HcrVf1 protein	Cluster 1; R_up_day	Cluster 1; R_up_night	Response to stimulus.Stress response.Biotic stress response.Plant-pathogen interaction	Diverse functions.Gene family with diverse functions.NBS-LRR superfamily
VIT_14s0068g02270	Hcr2-5B	Cluster 1; R_up_day	Cluster 1; R_up_night	Response to stimulus.Stress response.Biotic stress response
VIT_14s0081g00020	Pathogenesis-related protein-4 (Chitinase )	Cluster 1; R_up_day	Cluster 1; R_up_night	Metabolism.Primary metabolism.Carbohydrate metabolism.Monosaccharide metabolism.Amino sugar metabolism	Response to stimulus.Stress response
VIT_14s0081g00030	Pathogenesis-related protein-4 (Chitinase )	Cluster 1; R_up_day	Cluster 1; R_up_night	Metabolism.Primary metabolism.Carbohydrate metabolism.Monosaccharide metabolism.Amino sugar metabolism	Response to stimulus.Stress response
VIT_14s0081g00110	Pentatricopeptide (PPR) repeat-containing	Cluster 1; R_up_day	Cluster 1; R_up_night	Diverse functions.Gene family with diverse functions.Pentatricopeptide domain family
VIT_14s0081g00120	fertility restorer	Cluster 1; R_up_day	Cluster 1; R_up_night	Development.Reproductive development.Embryo development
VIT_14s0081g00140	Pentatricopeptide (PPR) repeat-containing	Cluster 1; R_up_day	Cluster 1; R_up_night	Diverse functions.Gene family with diverse functions.Pentatricopeptide domain family
VIT_14s0081g00250	No hit	Cluster 1; R_up_day	Cluster 1; R_up_night	No hit
VIT_14s0081g00640	Aspartate aminotransferase	Cluster 1; R_up_day	Cluster 1; R_up_night	Metabolism.Primary metabolism.Amino acid metabolism.Alanine and aspartate metabolism	Metabolism.Primary metabolism.Amino acid metabolism.Cysteine metabolism	Metabolism.Primary metabolism.Amino acid metabolism.Arginine and proline metabolism	Metabolism.Primary metabolism.Amino acid metabolism.Aromatic amino acid metabolism.Tyrosine metabolism	Metabolism.Primary metabolism.Amino acid metabolism.Aromatic amino acid metabolism.Phenylalanine metabolism.Phenylalanine biosynthesis	Metabolism.Primary metabolism.Amino acid metabolism.Aromatic amino acid metabolism.Aromatic amino acid biosynthesis	Metabolism.Primary metabolism.Carbon fixation	Metabolism.Secondary metabolism.Primary amino acids derivated metabolism.Alkaloid metabolism
VIT_14s0083g00010	Sugar transporter 1	Cluster 1; R_up_day	Cluster 1; R_up_night	Transport overview.Electrochemical Potential-driven Transporters.Porters.Major Facilitator Superfamily.Sugar Porter	Transport overview.Macromolecule transport.Carbohydrate transport.Sugar transport
VIT_14s0083g00020	Sugar transporter 1	Cluster 1; R_up_day	Cluster 1; R_up_night	Transport overview.Electrochemical Potential-driven Transporters.Porters.Major Facilitator Superfamily.Sugar Porter	Transport overview.Macromolecule transport.Carbohydrate transport.Sugar transport
VIT_14s0083g00030	Sugar transporter 1	Cluster 1; R_up_day	Cluster 1; R_up_night	Transport overview.Electrochemical Potential-driven Transporters.Porters.Major Facilitator Superfamily.Sugar Porter	Transport overview.Macromolecule transport.Carbohydrate transport.Sugar transport
VIT_14s0083g00440	PHD finger transcription factor	Cluster 1; R_up_day	Cluster 1; R_up_night	Regulation overview.Regulation of gene expression.Regulation of transcription.Transcription factor.PHD family transcription factor
VIT_14s0083g00540	Plant adhesion molecule 1 (PAM1)	Cluster 1; R_up_day	Cluster 1; R_up_night	Signaling.Signaling pathway.G-protein signaling pathway.RAB-GTPase regulation
VIT_14s0083g00570	Plant adhesion molecule 1 (PAM1)	Cluster 1; R_up_day	Cluster 1; R_up_night	Signaling.Signaling pathway.G-protein signaling pathway.RAB-GTPase regulation
VIT_14s0083g00590	Ribosomal RNA-processing protein 7	Cluster 1; R_up_day	Cluster 1; R_up_night	Cellular process.Cellular component organization and biogenesis.Ribosome organization and biogenesis
VIT_14s0083g00890	Transport inhibitor response 1 protein	Cluster 1; R_up_day	Cluster 1; R_up_night	Signaling.Hormone Signaling.Auxin Signaling.Auxin-mediated Signaling pathway
VIT_14s0083g00930	BIM2 (BES1-interacting Myc-like protein 2)	Cluster 1; R_up_day	Cluster 1; R_up_night	Signaling.Hormone Signaling.Brassinosteroid Signaling.Brassinosteroid-mediated Signaling pathway	Regulation overview.Regulation of gene expression.Regulation of transcription.Transcription factor.bHLH family transcription factor
VIT_14s0083g01170	Mitochondrial substrate carrier family protein	Cluster 1; R_up_day	Cluster 1; R_up_night	Transport overview.Electrochemical Potential-driven Transporters.Porters.Mitochondrial Carrier	Signaling.Signaling pathway.Calcium sensors and Signaling	Transport overview.Mitochondrial membrane transport
VIT_14s0083g01200	Nitrilase	Cluster 1; R_up_day	Cluster 1; R_up_night	Metabolism.Cellular metabolism.Nitrogen and sulfur metabolism.Nitrogen metabolism	Signaling.Hormone Signaling.Auxin Signaling.Auxin metabolism
VIT_14s0083g01230	Heat shock protein 81-4 (HSP81-4)	Cluster 1; R_up_day	Cluster 1; R_up_night	Metabolism.Primary metabolism.Protein metabolism and modification.Protein folding.Chaperone-mediated protein folding.HSP-mediated protein folding	Response to stimulus.Stress response.Biotic stress response.Plant-pathogen interaction	Metabolism.Primary metabolism.Protein metabolism and modification.Protein processing in endoplasmic reticulum
VIT_14s0108g00040	Structure-specific recognition protein 1 SSRP1	Cluster 1; R_up_day	Cluster 1; R_up_night	Regulation overview.Regulation of gene expression.Regulation of transcription.Transcription factor.HMG family transcription factor
VIT_14s0108g00540	Phosphofructokinase	Cluster 1; R_up_day	Cluster 1; R_up_night	Metabolism.Primary metabolism.Carbohydrate metabolism.Monosaccharide metabolism.Fructose and mannose metabolism	Metabolism.Primary metabolism.Carbohydrate metabolism.Glycolysis Gluconeogenesis
VIT_14s0108g00600	Pentatricopeptide (PPR) repeat-containing	Cluster 1; R_up_day	Cluster 1; R_up_night	Diverse functions.Gene family with diverse functions.Pentatricopeptide domain family
VIT_14s0108g00800	No hit	Cluster 1; R_up_day	Cluster 1; R_up_night	No hit
VIT_14s0108g00890	Beta-1	Cluster 1; R_up_day	Cluster 1; R_up_night	Metabolism.Primary metabolism.Lipid metabolism.Sphingolipid metabolism.Glycosphingolipid metabolism.Glycosphingolipid biosynthesis	Metabolism.Primary metabolism.Carbohydrate metabolism.Oligosaccharide metabolism
VIT_14s0108g00930	Unknown protein	Cluster 1; R_up_day	Cluster 1; R_up_night	Unknown
VIT_14s0108g01060	Pentatricopeptide (PPR) repeat-containing protein	Cluster 1; R_up_day	Cluster 1; R_up_night	Diverse functions.Gene family with diverse functions.Pentatricopeptide domain family
VIT_14s0108g01520	Glycosyl transferase family 8 protein	Cluster 1; R_up_day	Cluster 1; R_up_night	Metabolism.Primary metabolism.Carbohydrate metabolism.Glycosyl transference
VIT_14s0128g00150	DNA excision repair protein ERCC-1	Cluster 1; R_up_day	Cluster 1; R_up_night	Metabolism.Primary metabolism.Nucleobase, nucleoside, nucleotide, nucleic acid metabolism.Nucleic acid metabolism.DNA metabolism.DNA recombination and repair.repair.Nucleotide excision repair
VIT_14s0128g00180	Zinc finger (C3HC4-type ring finger)	Cluster 1; R_up_day	Cluster 1; R_up_night	Regulation overview.Regulation of gene expression.Regulation of transcription.Transcription factor.Zinc finger C3HC4 family transcription factor
VIT_14s0128g00390	Mitochondrial FAD carrier	Cluster 1; R_up_day	Cluster 1; R_up_night	Transport overview.Electrochemical Potential-driven Transporters.Porters.Mitochondrial Carrier	Transport overview.Macromolecule transport.Nucleotide transport
VIT_14s0128g00520	Alpha-L-fucosidase 2 precursor	Cluster 1; R_up_day	Cluster 1; R_up_night	Metabolism.Primary metabolism.Carbohydrate metabolism.Oligosaccharide metabolism.N-Glycan metabolism.N-Glycan catabolism
VIT_14s0128g00540	Germin-like protein 3 [Vitis vinifera]	Cluster 1; R_up_day	Cluster 1; R_up_night	Metabolism.Primary metabolism.Generation of metabolite precursors and energy.Storage proteins
VIT_14s0128g00610	Germin-like protein 3 [Vitis vinifera]	Cluster 1; R_up_day	Cluster 1; R_up_night	Metabolism.Primary metabolism.Generation of metabolite precursors and energy.Storage proteins
VIT_14s0128g00650	Germin-like protein 3 [Vitis vinifera]	Cluster 1; R_up_day	Cluster 1; R_up_night	Metabolism.Primary metabolism.Generation of metabolite precursors and energy.Storage proteins
VIT_14s0128g00770	F-box protein	Cluster 1; R_up_day	Cluster 1; R_up_night	Metabolism.Primary metabolism.Protein metabolism and modification.Proteolysis.cytoplasmic and nuclear protein degradation.Ubiquitin-mediated proteolysis
VIT_14s0171g00030	Beta-1	Cluster 1; R_up_day	Cluster 1; R_up_night	Metabolism.Primary metabolism.Lipid metabolism.Sphingolipid metabolism.Glycosphingolipid metabolism.Glycosphingolipid biosynthesis	Metabolism.Primary metabolism.Carbohydrate metabolism.Oligosaccharide metabolism
VIT_14s0171g00150	Avr9/Cf-9 rapidly elicited protein 57	Cluster 1; R_up_day	Cluster 1; R_up_night	Response to stimulus.Stress response.Biotic stress response
VIT_14s0171g00340	F-box family protein	Cluster 1; R_up_day	Cluster 1; R_up_night	Metabolism.Primary metabolism.Protein metabolism and modification.Proteolysis.cytoplasmic and nuclear protein degradation.Ubiquitin-mediated proteolysis
VIT_14s0171g00360	Unknown protein	Cluster 1; R_up_day	Cluster 1; R_up_night	Unknown
VIT_14s0171g00440	Glyceraldehyde-3-phosphate dehydrogenase GAPC3	Cluster 1; R_up_day	Cluster 1; R_up_night	Metabolism.Primary metabolism.Carbohydrate metabolism.Glycolysis Gluconeogenesis
VIT_14s0171g00470	No hit	Cluster 1; R_up_day	Cluster 1; R_up_night	No hit
VIT_14s0171g00480	F-box domain containing protein	Cluster 1; R_up_day	Cluster 1; R_up_night	Metabolism.Primary metabolism.Protein metabolism and modification.Proteolysis.cytoplasmic and nuclear protein degradation.Ubiquitin-mediated proteolysis
VIT_14s0219g00210	Ubiquitin family	Cluster 1; R_up_day	Cluster 1; R_up_night	Unclear
VIT_15s0021g00650	Purine permease 11 PUP11	Cluster 1; R_up_day	Cluster 1; R_up_night	Transport overview.Electrochemical Potential-driven Transporters.Porters.Drug/Metabolite Transporter.Plant Organocation Permease	Transport overview.Macromolecule transport.Nucleotide transport
VIT_15s0021g01460	RWD domain-containing protein	Cluster 1; R_up_day	Cluster 1; R_up_night	Unknown
VIT_15s0021g01500	RWD domain-containing protein	Cluster 1; R_up_day	Cluster 1; R_up_night	Unknown
VIT_15s0021g01810	Armadillo/beta-catenin repeat family protein	Cluster 1; R_up_day	Cluster 1; R_up_night	Unknown
VIT_15s0021g02040	Myb duo pollen 1	Cluster 1; R_up_day	Cluster 1; R_up_night	Regulation overview.Regulation of gene expression.Regulation of transcription.Transcription factor.MYB family transcription factor
VIT_15s0021g02060	Arbutin synthase	Cluster 1; R_up_day	Cluster 1; R_up_night	Metabolism.Primary metabolism.Carbohydrate metabolism.Polysaccharide metabolism.Starch and sucrose metabolism
VIT_15s0021g02090	DnaJ homolog	Cluster 1; R_up_day	Cluster 1; R_up_night	Transport overview.Primary Active Transporters.P-P-bond hydrolysis-driven transporters.General Secretory Pathway (Sec)	Metabolism.Primary metabolism.Protein metabolism and modification.Protein folding.Chaperone-mediated protein folding.HSP-mediated protein folding.HSP-mediated protein folding co-chaperone
VIT_15s0021g02350	Unknown	Cluster 1; R_up_day	Cluster 1; R_up_night	Unknown
VIT_15s0021g02390	No hit	Cluster 1; R_up_day	Cluster 1; R_up_night	No hit
VIT_15s0021g02670	Expansin beta 1 precursor	Cluster 1; R_up_day	Cluster 1; R_up_night	Signaling.Hormone Signaling.Auxin Signaling.Auxin-mediated Signaling pathway	Cellular process.Cellular component organization and biogenesis.Cell wall organization and biogenesis.Cell wall metabolism.Cell wall modification
VIT_15s0021g02700	Beta-expansin (EXPB4)	Cluster 1; R_up_day	Cluster 1; R_up_night	Signaling.Hormone Signaling.Auxin Signaling.Auxin-mediated Signaling pathway	Cellular process.Cellular component organization and biogenesis.Cell wall organization and biogenesis.Cell wall metabolism.Cell wall modification
VIT_15s0021g02790	ATELC/ELC	Cluster 1; R_up_day	Cluster 1; R_up_night	Transport overview.Macromolecule transport.Protein transport.Tethering factors	Metabolism.Primary metabolism.Protein metabolism and modification.Proteolysis.cytoplasmic and nuclear protein degradation.Ubiquitin-mediated proteolysis
VIT_15s0024g00190	No hit	Cluster 1; R_up_day	Cluster 1; R_up_night	No hit
VIT_15s0024g00250	V-type H+-transporting ATPase subunit D	Cluster 1; R_up_day	Cluster 1; R_up_night	Metabolism.Primary metabolism.Generation of metabolite precursors and energy.Electron transport.Respiratory-chain phosphorylation	Transport overview.Primary Active Transporters.P-P-bond hydrolysis-driven transporters.H+ or Na+ trsloc F-t, V-t and A-t ATPase	Transport overview.Ion transport.Cation transport.Proton transport	Cellular process.Cellular transport.Protein trafficking.Vesicle-mediated trafficking.Phagosome
VIT_15s0024g00370	Ribosomal protein P0 (RPP0A) acidic 60S	Cluster 1; R_up_day	Cluster 1; R_up_night	Metabolism.Primary metabolism.Protein metabolism and modification.Protein synthesis.Ribosome
VIT_15s0024g00400	R protein MLA10	Cluster 1; R_up_day	Cluster 1; R_up_night	Response to stimulus.Stress response.Biotic stress response.Plant-pathogen interaction.R proteins from Plant-pathogen interaction
VIT_15s0024g00510	No hit	Cluster 1; R_up_day	Cluster 1; R_up_night	No hit
VIT_15s0024g00680	No hit	Cluster 1; R_up_day	Cluster 1; R_up_night	No hit
VIT_15s0024g00720	Delta 1-pyrroline-5-carboxylate synthetase	Cluster 1; R_up_day	Cluster 1; R_up_night	Metabolism.Primary metabolism.Amino acid metabolism.Arginine and proline metabolism.Proline metabolism
VIT_15s0024g00850	Geranylgeranyl diphosphate synthase	Cluster 1; R_up_day	Cluster 1; R_up_night	Metabolism.Primary metabolism.Lipid metabolism.Steroid metabolism.Steroid biosynthesis	Metabolism.Secondary metabolism.Terpenoid metabolism.Terpenoid biosynthesis
VIT_15s0024g01050	Tubulin beta-8	Cluster 1; R_up_day	Cluster 1; R_up_night	Cellular process.Cellular component organization and biogenesis.Cytoskeleton organization and biogenesis.Microtubule organization and biogenesis	Cellular process.Cellular transport.Protein trafficking.Vesicle-mediated trafficking.Phagosome
VIT_15s0024g01150	No hit	Cluster 1; R_up_day	Cluster 1; R_up_night	No hit
VIT_15s0024g01180	No hit	Cluster 1; R_up_day	Cluster 1; R_up_night	No hit
VIT_15s0024g01220	Splicing factor 3B subunit 3	Cluster 1; R_up_day	Cluster 1; R_up_night	Metabolism.Primary metabolism.Nucleobase, nucleoside, nucleotide, nucleic acid metabolism.Nucleic acid metabolism.RNA metabolism.RNA processing.mRNA processing.mRNA splicing
VIT_15s0024g01280	Peptidyl-prolyl cis-trans isomerase NIMA-interacting 1	Cluster 1; R_up_day	Cluster 1; R_up_night	Metabolism.Primary metabolism.Protein metabolism and modification.Protein folding.Peptidyl prolyl isomerase-mediated protein folding
VIT_15s0024g01320	No hit	Cluster 1; R_up_day	Cluster 1; R_up_night	No hit
VIT_15s0024g01330	No hit	Cluster 1; R_up_day	Cluster 1; R_up_night	No hit
VIT_15s0024g01340	Oxidoreductase NQR	Cluster 1; R_up_day	Cluster 1; R_up_night	unknown
VIT_15s0024g01590	No hit	Cluster 1; R_up_day	Cluster 1; R_up_night	No hit
VIT_15s0024g01710	No hit	Cluster 1; R_up_day	Cluster 1; R_up_night	No hit
VIT_15s0024g01810	No hit	Cluster 1; R_up_day	Cluster 1; R_up_night	No hit
VIT_15s0024g01930	No hit	Cluster 1; R_up_day	Cluster 1; R_up_night	No hit
VIT_15s0024g01980	No hit	Cluster 1; R_up_day	Cluster 1; R_up_night	No hit
VIT_15s0045g00040	Copper-binding family protein	Cluster 1; R_up_day	Cluster 1; R_up_night	Unclear
VIT_15s0045g00090	ABC transporter C member 9	Cluster 1; R_up_day	Cluster 1; R_up_night	Transport overview.Macromolecule transport.Multidrug transport.Multidrug ABC transport
VIT_15s0045g00200	CTV.22	Cluster 1; R_up_day	Cluster 1; R_up_night	Unknown
VIT_15s0045g00260	No hit	Cluster 1; R_up_day	Cluster 1; R_up_night	No hit
VIT_15s0045g00420	Shaggy protein kinase alpha SK11	Cluster 1; R_up_day	Cluster 1; R_up_night	Signaling.Signaling pathway.Protein kinase
VIT_15s0045g00480	Unknown	Cluster 1; R_up_day	Cluster 1; R_up_night	Unknown
VIT_15s0045g00950	No hit	Cluster 1; R_up_day	Cluster 1; R_up_night	No hit
VIT_15s0045g01370	Unknown	Cluster 1; R_up_day	Cluster 1; R_up_night	Unknown
VIT_15s0045g01430	No hit	Cluster 1; R_up_day	Cluster 1; R_up_night	No hit
VIT_15s0046g00020	Ubiquitin-protein ligase	Cluster 1; R_up_day	Cluster 1; R_up_night	Unclear
VIT_15s0046g00150	DOF affecting germination 1	Cluster 1; R_up_day	Cluster 1; R_up_night	Regulation overview.Regulation of gene expression.Regulation of transcription.Transcription factor.C2C2-DOF family transcription factor
VIT_15s0046g00470	Dynamin-like protein 2b	Cluster 1; R_up_day	Cluster 1; R_up_night	Transport overview.Incompletely characterized transport systems.Putative transport protein.YbbM	Transport overview.Macromolecule transport.Protein transport.Protein coat	Cellular process.Cellular transport.Protein trafficking.Vesicle-mediated trafficking
VIT_15s0046g00490	Wax synthase	Cluster 1; R_up_day	Cluster 1; R_up_night	Metabolism.single reactions	Metabolism.Primary metabolism.Lipid metabolism.Wax metabolism.Wax biosynthesis
VIT_15s0046g00810	Serine/threonine protein phosphatase 1; PP1	Cluster 1; R_up_day	Cluster 1; R_up_night	Metabolism.Primary metabolism.Carbohydrate metabolism.Polysaccharide metabolism.Starch and sucrose metabolism	Signaling.Signaling pathway.Protein phosphatase
VIT_15s0046g00950	Autophagy protein Apg6	Cluster 1; R_up_day	Cluster 1; R_up_night	Metabolism.Cellular metabolism.Cellular catabolism.Autophagy
VIT_15s0046g00960	Beclin 1 protein [Vitis vinifera]	Cluster 1; R_up_day	Cluster 1; R_up_night	Unknown
VIT_15s0046g00980	Cyclic nucleotide-regulated ion channel 1	Cluster 1; R_up_day	Cluster 1; R_up_night	Response to stimulus.Stress response.Biotic stress response.Plant-pathogen interaction	Transport overview.Channels and pores.a-Type channels.The Voltage-gated Ion Channel.Cyclic nucleotide-gated nonselective cation channel	Signaling.Signaling pathway.Calcium sensors and Signaling	Transport overview.Ion transport.Cation transport
VIT_15s0046g01500	Translation initiation factor eIF-1A	Cluster 1; R_up_day	Cluster 1; R_up_night	Metabolism.Primary metabolism.Protein metabolism and modification.Protein synthesis.Translation.Translational initiation	Transport overview.Macromolecule transport.RNA transport
VIT_15s0046g01570	Acidic endochitinase (CHIB1)	Cluster 1; R_up_day	Cluster 1; R_up_night	Metabolism.Primary metabolism.Carbohydrate metabolism.Monosaccharide metabolism.Amino sugar metabolism	Response to stimulus.Stress response
VIT_15s0046g01740	Unknown protein	Cluster 1; R_up_day	Cluster 1; R_up_night	Unknown
VIT_15s0046g02220	ACC synthase	Cluster 1; R_up_day	Cluster 1; R_up_night	Metabolism.Primary metabolism.Organic acid metabolism.Propanoate metabolism	Signaling.Hormone Signaling.Ethylene Signaling.Ethylene-mediated Signaling pathway	Signaling.Hormone Signaling.Ethylene Signaling.Ethylene metabolism.Ethylene biosynthesis
VIT_15s0046g02440	Transcription regulator/ zinc ion binding	Cluster 1; R_up_day	Cluster 1; R_up_night	Regulation overview.Regulation of gene expression.Regulation of transcription.Transcriptional co-activation
VIT_15s0046g02950	Barwin endoglucanase	Cluster 1; R_up_day	Cluster 1; R_up_night	Response to stimulus.Stress response.Biotic stress response
VIT_15s0046g02960	Barwin endoglucanase	Cluster 1; R_up_day	Cluster 1; R_up_night	Response to stimulus.Stress response.Biotic stress response
VIT_15s0046g02990	Barwin endoglucanase	Cluster 1; R_up_day	Cluster 1; R_up_night	Response to stimulus.Stress response.Biotic stress response
VIT_15s0046g03000	Barwin endoglucanase	Cluster 1; R_up_day	Cluster 1; R_up_night	Response to stimulus.Stress response.Biotic stress response
VIT_15s0046g03090	DTA2 (downstream target of AGL15 2)	Cluster 1; R_up_day	Cluster 1; R_up_night	Unknown
VIT_15s0048g00070	No hit	Cluster 1; R_up_day	Cluster 1; R_up_night	No hit
VIT_15s0048g00170	H(+)-ATPase 4 AHA4	Cluster 1; R_up_day	Cluster 1; R_up_night	Metabolism.Primary metabolism.Generation of metabolite precursors and energy.Electron transport.Respiratory-chain phosphorylation	Transport overview.Primary Active Transporters.P-P-bond hydrolysis-driven transporters.P-type ATPase (P-ATPase).Plasma membrane H+ ATPase	Transport overview.Ion transport.Cation transport.Proton transport
VIT_15s0048g00290	No hit	Cluster 1; R_up_day	Cluster 1; R_up_night	No hit
VIT_15s0048g00380	RAD51C DNA repair protein	Cluster 1; R_up_day	Cluster 1; R_up_night	Metabolism.Primary metabolism.Nucleobase, nucleoside, nucleotide, nucleic acid metabolism.Nucleic acid metabolism.DNA metabolism.DNA recombination and repair.recombination	Cellular process.Cell growth and death	Metabolism.Primary metabolism.Nucleobase, nucleoside, nucleotide, nucleic acid metabolism.Nucleic acid metabolism.DNA metabolism.DNA recombination and repair.repair
VIT_15s0048g00570	No hit	Cluster 1; R_up_day	Cluster 1; R_up_night	No hit
VIT_15s0048g00620	No hit	Cluster 1; R_up_day	Cluster 1; R_up_night	No hit
VIT_15s0048g00740	No hit	Cluster 1; R_up_day	Cluster 1; R_up_night	No hit
VIT_15s0048g00970	Cytokinesis Sec1 protein (KEULE)	Cluster 1; R_up_day	Cluster 1; R_up_night	Cellular process.Cellular transport.Protein trafficking.Vesicle-mediated trafficking.SNARE interactions in vesicular transport	Transport overview.Macromolecule transport.Protein transport.Tethering factors	Cellular process.Cell growth and death.Cell division.Mitosis
VIT_15s0048g01220	CRS2-associated factor 1	Cluster 1; R_up_day	Cluster 1; R_up_night	Metabolism.Primary metabolism.Nucleobase, nucleoside, nucleotide, nucleic acid metabolism.Nucleic acid metabolism.RNA metabolism.RNA processing.mRNA processing.mRNA splicing
VIT_15s0048g01440	Geraniol 10-hydroxylase	Cluster 1; R_up_day	Cluster 1; R_up_night	Metabolism.Secondary metabolism.Terpenoid metabolism.Monoterpenoid metabolism.Monoterpenoid biosynthesis	Metabolism.Secondary metabolism.Primary amino acids derivated metabolism.Alkaloid metabolism.Alkaloid biosynthesis.Monoterpenoid indole alkaloid metabolism.Monoterpenoid indole alkaloid biosynthesis
VIT_15s0048g01470	Geraniol 10-hydroxylase	Cluster 1; R_up_day	Cluster 1; R_up_night	Metabolism.Secondary metabolism.Terpenoid metabolism.Monoterpenoid metabolism.Monoterpenoid biosynthesis	Metabolism.Secondary metabolism.Primary amino acids derivated metabolism.Alkaloid metabolism.Alkaloid biosynthesis.Monoterpenoid indole alkaloid metabolism.Monoterpenoid indole alkaloid biosynthesis
VIT_15s0048g01480	Geraniol 10-hydroxylase	Cluster 1; R_up_day	Cluster 1; R_up_night	Metabolism.Secondary metabolism.Terpenoid metabolism.Monoterpenoid metabolism.Monoterpenoid biosynthesis	Metabolism.Secondary metabolism.Primary amino acids derivated metabolism.Alkaloid metabolism.Alkaloid biosynthesis.Monoterpenoid indole alkaloid metabolism.Monoterpenoid indole alkaloid biosynthesis
VIT_15s0048g01490	Geraniol 10-hydroxylase	Cluster 1; R_up_day	Cluster 1; R_up_night	Metabolism.Secondary metabolism.Terpenoid metabolism.Monoterpenoid metabolism.Monoterpenoid biosynthesis	Metabolism.Secondary metabolism.Primary amino acids derivated metabolism.Alkaloid metabolism.Alkaloid biosynthesis.Monoterpenoid indole alkaloid metabolism.Monoterpenoid indole alkaloid biosynthesis
VIT_15s0048g01530	Geraniol 10-hydroxylase	Cluster 1; R_up_day	Cluster 1; R_up_night	Metabolism.Secondary metabolism.Terpenoid metabolism.Monoterpenoid metabolism.Monoterpenoid biosynthesis	Metabolism.Secondary metabolism.Primary amino acids derivated metabolism.Alkaloid metabolism.Alkaloid biosynthesis.Monoterpenoid indole alkaloid metabolism.Monoterpenoid indole alkaloid biosynthesis
VIT_15s0048g01550	CYP76C1	Cluster 1; R_up_day	Cluster 1; R_up_night	Metabolism.Cellular metabolism.Oxidation reduction.Cytochrome P450 oxidoreductase
VIT_15s0048g01900	Unknown protein	Cluster 1; R_up_day	Cluster 1; R_up_night	Unknown
VIT_15s0048g01920	F-box family protein	Cluster 1; R_up_day	Cluster 1; R_up_night	Metabolism.Primary metabolism.Protein metabolism and modification.Proteolysis.cytoplasmic and nuclear protein degradation.Ubiquitin-mediated proteolysis
VIT_15s0048g02400	Serine/threonine-protein kinase	Cluster 1; R_up_day	Cluster 1; R_up_night	Signaling.Signaling pathway.Protein kinase
VIT_15s0048g02710	No hit	Cluster 1; R_up_day	Cluster 1; R_up_night	No hit
VIT_15s0048g02920	Unknown	Cluster 1; R_up_day	Cluster 1; R_up_night	Unknown
VIT_15s0048g02940	Unknown	Cluster 1; R_up_day	Cluster 1; R_up_night	Unknown
VIT_15s0048g02950	Unknown	Cluster 1; R_up_day	Cluster 1; R_up_night	Unknown
VIT_15s0107g00040	Acylamino-acid-releasing enzyme	Cluster 1; R_up_day	Cluster 1; R_up_night	Metabolism.Primary metabolism.Protein metabolism and modification.Proteolysis.Peptidase-mediated proteolysis
VIT_15s0107g00070	No hit	Cluster 1; R_up_day	Cluster 1; R_up_night	No hit
VIT_15s0107g00160	Glutathione S-transferase GSTU7	Cluster 1; R_up_day	Cluster 1; R_up_night	Metabolism.Primary metabolism.Coenzyme and prosthetic group metabolism.Peptide derived compounds biosynthesis.Glutathione metabolism	Response to stimulus.Stress response.Abiotic stress response.Oxidative stress response
VIT_15s0107g00170	Dynamin-like 3	Cluster 1; R_up_day	Cluster 1; R_up_night	Transport overview.Incompletely characterized transport systems.Putative transport protein.YbbM	Cellular process.Cellular transport.Protein trafficking.Vesicle-mediated trafficking
VIT_15s0107g00230	Splicing factor 3B subunit 3	Cluster 1; R_up_day	Cluster 1; R_up_night	Metabolism.Primary metabolism.Nucleobase, nucleoside, nucleotide, nucleic acid metabolism.Nucleic acid metabolism.RNA metabolism.RNA processing.mRNA processing.mRNA splicing
VIT_15s0107g00390	5'-adenylylsulfate reductase (APR3)	Cluster 1; R_up_day	Cluster 1; R_up_night	Metabolism.Cellular metabolism.Nitrogen and sulfur metabolism.Sulfur metabolism
VIT_16s0013g00050	Unknown	Cluster 1; R_up_day	Cluster 1; R_up_night	Unknown
VIT_16s0013g00070	Unknown	Cluster 1; R_up_day	Cluster 1; R_up_night	Unknown
VIT_16s0013g00110	Thioredoxin reductase 1	Cluster 1; R_up_day	Cluster 1; R_up_night	Metabolism.Primary metabolism.Nucleobase, nucleoside, nucleotide, nucleic acid metabolism.Nucleotide metabolism.Pyrimidine metabolism	Cellular process.Cellular homeostasis.Cell redox homeostasis
VIT_16s0013g00140	Pectinesterase family	Cluster 1; R_up_day	Cluster 1; R_up_night	Cellular process.Cellular component organization and biogenesis.Cell wall organization and biogenesis.Cell wall metabolism.Cell wall modification.Pectin modification
VIT_16s0013g00160	Pectinesterase PPME1	Cluster 1; R_up_day	Cluster 1; R_up_night	Cellular process.Cellular component organization and biogenesis.Cell wall organization and biogenesis.Cell wall metabolism.Cell wall modification.Pectin modification
VIT_16s0013g00230	Caspase	Cluster 1; R_up_day	Cluster 1; R_up_night	Metabolism.Primary metabolism.Protein metabolism and modification.Proteolysis.Peptidase-mediated proteolysis
VIT_16s0013g00250	No hit	Cluster 1; R_up_day	Cluster 1; R_up_night	No hit
VIT_16s0013g00550	No hit	Cluster 1; R_up_day	Cluster 1; R_up_night	No hit
VIT_16s0013g00600	No hit	Cluster 1; R_up_day	Cluster 1; R_up_night	No hit
VIT_16s0013g00740	Fe2+ dioxygenase-like	Cluster 1; R_up_day	Cluster 1; R_up_night	Unclear
VIT_16s0013g00810	Unknown	Cluster 1; R_up_day	Cluster 1; R_up_night	Unknown
VIT_16s0013g00890	Ethylene-responsive element binding factor	Cluster 1; R_up_day	Cluster 1; R_up_night	Signaling.Hormone Signaling.Ethylene Signaling.Ethylene-mediated Signaling pathway	Regulation overview.Regulation of gene expression.Regulation of transcription.Transcription factor.AP2 family transcription factor.ERF subfamily transcription factor
VIT_16s0013g01140	Phosphofructokinase	Cluster 1; R_up_day	Cluster 1; R_up_night	Metabolism.Primary metabolism.Carbohydrate metabolism.Monosaccharide metabolism.Fructose and mannose metabolism	Metabolism.Primary metabolism.Carbohydrate metabolism.Glycolysis Gluconeogenesis
VIT_16s0013g01300	No hit	Cluster 1; R_up_day	Cluster 1; R_up_night	No hit
VIT_16s0013g01330	Receptor kinase homolog LRK14	Cluster 1; R_up_day	Cluster 1; R_up_night	Signaling.Signaling pathway.Protein kinase
VIT_16s0013g01350	Receptor kinase homolog LRK10	Cluster 1; R_up_day	Cluster 1; R_up_night	Signaling.Signaling pathway.Protein kinase
VIT_16s0013g01380	No hit	Cluster 1; R_up_day	Cluster 1; R_up_night	No hit
VIT_16s0013g01390	Receptor kinase homolog LRK10	Cluster 1; R_up_day	Cluster 1; R_up_night	Signaling.Signaling pathway.Protein kinase
VIT_16s0013g01460	No hit	Cluster 1; R_up_day	Cluster 1; R_up_night	No hit
VIT_16s0013g01500	Disease resistance protein	Cluster 1; R_up_day	Cluster 1; R_up_night	Diverse functions.Gene family with diverse functions.NBS-LRR superfamily	Response to stimulus.Stress response.Biotic stress response
VIT_16s0013g01610	Ribosomal protein P1 acidic 60S	Cluster 1; R_up_day	Cluster 1; R_up_night	Metabolism.Primary metabolism.Protein metabolism and modification.Protein synthesis.Ribosome
VIT_16s0013g01650	Calmodulin-6 (CAM6)	Cluster 1; R_up_day	Cluster 1; R_up_night	Signaling.Signaling pathway.Calcium sensors and Signaling	Response to stimulus.Stress response.Biotic stress response.Plant-pathogen interaction
VIT_16s0013g01660	Unknown	Cluster 1; R_up_day	Cluster 1; R_up_night	Unknown
VIT_16s0013g01780	Derlin-1	Cluster 1; R_up_day	Cluster 1; R_up_night	Transport overview.Primary Active Transporters.P-P-bond hydrolysis-driven transporters.Endoplasmic Reticular Retrotranslocon	Metabolism.Primary metabolism.Protein metabolism and modification.Protein processing in endoplasmic reticulum
VIT_16s0013g01970	Pleckstrin homology (PH) domain-containing	Cluster 1; R_up_day	Cluster 1; R_up_night	Signaling.Signaling pathway.G-protein signaling pathway	Signaling.Signaling pathway.Phosphatidylinositol Signaling
VIT_16s0013g02040	Structural maintenance of chromosomes (SMC) family	Cluster 1; R_up_day	Cluster 1; R_up_night	Cellular process.Cellular component organization and biogenesis.Nucleus.Chromosome organization and biogenesis
VIT_16s0013g02060	No hit	Cluster 1; R_up_day	Cluster 1; R_up_night	No hit
VIT_16s0013g02080	MIM (hypersensitive to MMS	Cluster 1; R_up_day	Cluster 1; R_up_night	Metabolism.Primary metabolism.Nucleobase, nucleoside, nucleotide, nucleic acid metabolism.Nucleic acid metabolism.DNA metabolism
VIT_16s0013g02100	2-phosphoglycerate kinase	Cluster 1; R_up_day	Cluster 1; R_up_night	Metabolism.Primary metabolism.Carbohydrate metabolism.Glycolysis Gluconeogenesis.Glycolysis
VIT_16s0022g00070	No hit	Cluster 1; R_up_day	Cluster 1; R_up_night	No hit
VIT_16s0022g00240	EIX receptor 2	Cluster 1; R_up_day	Cluster 1; R_up_night	Diverse functions.Gene family with diverse functions.NBS-LRR superfamily	Response to stimulus.Stress response.Biotic stress response
VIT_16s0022g00360	TMK1 (transmembrane kinase 1)	Cluster 1; R_up_day	Cluster 1; R_up_night	Signaling.Signaling pathway.Protein kinase
VIT_16s0022g00400	No hit	Cluster 1; R_up_day	Cluster 1; R_up_night	No hit
VIT_16s0022g00440	Dynein light chain LC8-type	Cluster 1; R_up_day	Cluster 1; R_up_night	Cellular process.Cellular component organization and biogenesis.Cytoskeleton organization and biogenesis.Microtubule organization and biogenesis.Microtubule-driven movement
VIT_16s0022g00610	Unknown protein	Cluster 1; R_up_day	Cluster 1; R_up_night	Unknown
VIT_16s0022g00740	Granule-bound starch synthase Ib precursor	Cluster 1; R_up_day	Cluster 1; R_up_night	Metabolism.Primary metabolism.Carbohydrate metabolism.Polysaccharide metabolism.Starch and sucrose metabolism.Starch biosynthesis catabolism.Starch biosynthesis
VIT_16s0022g00770	Dynamin-2A	Cluster 1; R_up_day	Cluster 1; R_up_night	Cellular process.Cellular transport.Protein trafficking.Vesicle-mediated trafficking	Signaling.Signaling pathway.G-protein signaling pathway
VIT_16s0022g00900	No hit	Cluster 1; R_up_day	Cluster 1; R_up_night	No hit
VIT_16s0022g01310	Hydroxymethylglutaryl coenzyme A synthase	Cluster 1; R_up_day	Cluster 1; R_up_night	Metabolism.Primary metabolism.Lipid metabolism.Synthesis and degradation of ketone bodies	Metabolism.Primary metabolism.Amino acid metabolism.Valine, leucine, and isoleucine metabolism.Valine, leucine, and isoleucine catabolism	Metabolism.Primary metabolism.Organic acid metabolism.Butanoate metabolism
VIT_16s0022g01520		Cluster 1; R_up_day	Cluster 1; R_up_night	Metabolism.Primary metabolism.Amino acid metabolism.Aromatic amino acid metabolism.Tyrosine metabolism	Metabolism.Secondary metabolism.Aromatic compound metabolism.Betalain biosynthesis
VIT_16s0022g01660	Receptor kinase homolog LRK10	Cluster 1; R_up_day	Cluster 1; R_up_night	Signaling.Signaling pathway.Protein kinase
VIT_16s0022g01980	Zf A20 and AN1 domain-containing stress-associated protein 1	Cluster 1; R_up_day	Cluster 1; R_up_night	Regulation overview.Regulation of gene expression.Regulation of transcription.Transcription factor.Zinc finger AN1 family transcription factor
VIT_16s0022g02450	Subtilisin protease C1	Cluster 1; R_up_day	Cluster 1; R_up_night	Metabolism.Primary metabolism.Protein metabolism and modification.Proteolysis.Peptidase-mediated proteolysis.Subtilase-mediated proteolysis
VIT_16s0022g02500	No hit	Cluster 1; R_up_day	Cluster 1; R_up_night	No hit
VIT_16s0022g02510	Protein phosphatase 2C	Cluster 1; R_up_day	Cluster 1; R_up_night	Signaling.Signaling pathway.Protein phosphatase.PP2C
VIT_16s0039g00190	Leucine-rich repeat transmembrane protein kinase	Cluster 1; R_up_day	Cluster 1; R_up_night	Signaling.Signaling pathway.Protein kinase
VIT_16s0039g00260	Pectate lyase	Cluster 1; R_up_day	Cluster 1; R_up_night	Cellular process.Cellular component organization and biogenesis.Cell wall organization and biogenesis.Cell wall metabolism.Cell wall catabolism.Pectin catabolism
VIT_16s0039g00440	PHD zinc finger protein	Cluster 1; R_up_day	Cluster 1; R_up_night	Unknown
VIT_16s0039g00700	RCP1 (root cap 1)	Cluster 1; R_up_day	Cluster 1; R_up_night	Transport overview.Electrochemical Potential-driven Transporters.Porters.Chloroplast Maltose Exporter	Transport overview.Macromolecule transport.Carbohydrate transport
VIT_16s0039g00720	Folate-biopterin transporter	Cluster 1; R_up_day	Cluster 1; R_up_night	Transport overview.Electrochemical Potential-driven Transporters.Porters.Folate-Biopterin Transporter
VIT_16s0039g00810	No hit	Cluster 1; R_up_day	Cluster 1; R_up_night	No hit
VIT_16s0039g00980	PHD zinc finger protein	Cluster 1; R_up_day	Cluster 1; R_up_night	Unknown
VIT_16s0039g01050	NADP dependent malic enzyme	Cluster 1; R_up_day	Cluster 1; R_up_night	Metabolism.Primary metabolism.Carbohydrate metabolism.Monosaccharide metabolism.Pyruvate metabolism	Metabolism.Primary metabolism.Organic acid metabolism.Malic acid metabolism
VIT_16s0039g01070	Glutathione S-transferase 25 GSTU7	Cluster 1; R_up_day	Cluster 1; R_up_night	Metabolism.Primary metabolism.Coenzyme and prosthetic group metabolism.Peptide derived compounds biosynthesis.Glutathione metabolism	Response to stimulus.Stress response.Abiotic stress response.Oxidative stress response
VIT_16s0039g01080	U3 small nucleolar RNA-associated protein 22	Cluster 1; R_up_day	Cluster 1; R_up_night	Cellular process.Cellular component organization and biogenesis.Ribosome organization and biogenesis
VIT_16s0039g01160	Sorting nexin 1	Cluster 1; R_up_day	Cluster 1; R_up_night	Unclear
VIT_16s0039g01230	VPS5A subunit of retromer complex	Cluster 1; R_up_day	Cluster 1; R_up_night	Transport overview.Macromolecule transport.Protein transport.Protein coat	Cellular process.Cellular transport.Protein trafficking.Vesicle-mediated trafficking
VIT_16s0039g01380	Shikimate kinase	Cluster 1; R_up_day	Cluster 1; R_up_night	Metabolism.Primary metabolism.Amino acid metabolism.Aromatic amino acid metabolism.Aromatic amino acid biosynthesis	Metabolism.Cellular metabolism.Shikimate metabolism	Metabolism.Primary metabolism.Amino acid metabolism.Amino acid biosynthesis
VIT_16s0039g01580	Carbohydrate kinase	Cluster 1; R_up_day	Cluster 1; R_up_night	Metabolism.Primary metabolism.Carbohydrate metabolism.Monosaccharide metabolism.Monosaccharide catabolism.Pentose-phosphate shunt
VIT_16s0039g01830	No hit	Cluster 1; R_up_day	Cluster 1; R_up_night	No hit
VIT_16s0039g01960	No hit	Cluster 1; R_up_day	Cluster 1; R_up_night	No hit
VIT_16s0039g02100	U4/U6 small nuclear ribonucleoprotein PRP31	Cluster 1; R_up_day	Cluster 1; R_up_night	Metabolism.Primary metabolism.Nucleobase, nucleoside, nucleotide, nucleic acid metabolism.Nucleic acid metabolism.RNA metabolism.RNA processing.mRNA processing.mRNA splicing	Metabolism.Primary metabolism.Protein metabolism and modification.Protein folding
VIT_16s0039g02230	UDP-glucose:flavonoid 3-O-glucosyltransferase	Cluster 1; R_up_day	Cluster 1; R_up_night	Metabolism.Secondary metabolism.Phenylpropanoid metabolism.Flavonoid metabolism.Flavonoid biosynthesis.Flavonoid-glycoside biosynthesis
VIT_16s0039g02380	Disease resistance family protein	Cluster 1; R_up_day	Cluster 1; R_up_night	Diverse functions.Gene family with diverse functions.NBS-LRR superfamily	Response to stimulus.Stress response.Biotic stress response
VIT_16s0039g02390	Unknown protein	Cluster 1; R_up_day	Cluster 1; R_up_night	Unknown
VIT_16s0039g02690	Ankyrin repeat	Cluster 1; R_up_day	Cluster 1; R_up_night	Transport overview.Accessory factors involved in transport.Auxiliary transport proteins.Ankyrin	Diverse functions.Gene family with diverse functions.Ankyrin domain family
VIT_16s0039g02730	TIR1 (transport inhibitor response 1)	Cluster 1; R_up_day	Cluster 1; R_up_night	Signaling.Hormone Signaling.Auxin Signaling.Auxin-mediated Signaling pathway
VIT_16s0039g02870	No hit	Cluster 1; R_up_day	Cluster 1; R_up_night	No hit
VIT_16s0039g02930	Unknown	Cluster 1; R_up_day	Cluster 1; R_up_night	Unknown
VIT_16s0050g00040	Pentatricopeptide (PPR) repeat-containing	Cluster 1; R_up_day	Cluster 1; R_up_night	Diverse functions.Gene family with diverse functions.Pentatricopeptide domain family
VIT_16s0050g00290	No hit	Cluster 1; R_up_day	Cluster 1; R_up_night	No hit
VIT_16s0050g00330	No hit	Cluster 1; R_up_day	Cluster 1; R_up_night	No hit
VIT_16s0050g00400	Photoassimilate-responsive protein PAR-1a	Cluster 1; R_up_day	Cluster 1; R_up_night	Unknown
VIT_16s0050g00410	Photoassimilate-responsive protein PAR-1a	Cluster 1; R_up_day	Cluster 1; R_up_night	Unknown
VIT_16s0050g00430	Photoassimilate-responsive protein PAR-1a	Cluster 1; R_up_day	Cluster 1; R_up_night	Unknown
VIT_16s0050g00900	AnthoMATE3	Cluster 1; R_up_day	Cluster 1; R_up_night	Transport overview.Electrochemical Potential-driven Transporters.Porters.Multidrug/Oligosaccharidyl-lipid/Polysaccharide Flippase.Multi Antimicrobial Extrusion	Transport overview.Macromolecule transport.Multidrug transport.Anthocyanin transport
VIT_16s0050g01410	Unknown	Cluster 1; R_up_day	Cluster 1; R_up_night	Unknown
VIT_16s0050g01830	AAA-type ATPase	Cluster 1; R_up_day	Cluster 1; R_up_night	Diverse functions.Gene family with diverse functions.AAA-type ATPase domain family
VIT_16s0050g02020	Ser/Thr receptor-like kinase1	Cluster 1; R_up_day	Cluster 1; R_up_night	Signaling.Signaling pathway.Protein kinase
VIT_16s0050g02060	Receptor kinase homolog LRK10	Cluster 1; R_up_day	Cluster 1; R_up_night	Signaling.Signaling pathway.Protein kinase
VIT_16s0050g02210	Chitinase III [Vitis vinifera]	Cluster 1; R_up_day	Cluster 1; R_up_night	Metabolism.Primary metabolism.Carbohydrate metabolism.Monosaccharide metabolism.Amino sugar metabolism	Response to stimulus.Stress response
VIT_16s0050g02220	Acidic endochitinase (CHIB1)	Cluster 1; R_up_day	Cluster 1; R_up_night	Metabolism.Primary metabolism.Carbohydrate metabolism.Monosaccharide metabolism.Amino sugar metabolism	Response to stimulus.Stress response
VIT_16s0050g02230	Chitinase [Vitis vinifera]	Cluster 1; R_up_day	Cluster 1; R_up_night	Metabolism.Primary metabolism.Carbohydrate metabolism.Monosaccharide metabolism.Amino sugar metabolism	Response to stimulus.Stress response
VIT_16s0050g02770	Brassinosteroid insensitive 1-associated receptor kinase 1	Cluster 1; R_up_day	Cluster 1; R_up_night	Signaling.Hormone Signaling.Brassinosteroid Signaling.Brassinosteroid-mediated Signaling pathway	Response to stimulus.Stress response.Biotic stress response.Plant-pathogen interaction
VIT_16s0098g00010	Receptor-like protein kinase	Cluster 1; R_up_day	Cluster 1; R_up_night	Signaling.Signaling pathway.Protein kinase
VIT_16s0098g00100	Receptor serine/threonine kinase	Cluster 1; R_up_day	Cluster 1; R_up_night	Signaling.Signaling pathway.Protein kinase
VIT_16s0098g00110	Receptor kinase LRK10	Cluster 1; R_up_day	Cluster 1; R_up_night	Signaling.Signaling pathway.Protein kinase
VIT_16s0098g00120	Polynucleotidyl transferase	Cluster 1; R_up_day	Cluster 1; R_up_night	Metabolism.Primary metabolism.Nucleobase, nucleoside, nucleotide, nucleic acid metabolism.Nucleic acid metabolism.RNA metabolism.RNA processing
VIT_16s0098g00180	Ser/Thr receptor-like kinase1	Cluster 1; R_up_day	Cluster 1; R_up_night	Signaling.Signaling pathway.Protein kinase
VIT_16s0098g00460	Lipase class 3	Cluster 1; R_up_day	Cluster 1; R_up_night	Unclear
VIT_16s0098g00570	ABC transporter B member 16	Cluster 1; R_up_day	Cluster 1; R_up_night	Transport overview.Macromolecule transport.Multidrug transport.Multidrug ABC transport
VIT_16s0098g00580	Zinc finger protein UFM	Cluster 1; R_up_day	Cluster 1; R_up_night	Metabolism.Primary metabolism.Protein metabolism and modification.Proteolysis.Peptidase proteins
VIT_16s0098g00700	No hit	Cluster 1; R_up_day	Cluster 1; R_up_night	No hit
VIT_16s0098g00800	Copper-binding family protein	Cluster 1; R_up_day	Cluster 1; R_up_night	Unclear
VIT_16s0098g01150	Auxin-responsive SAUR29	Cluster 1; R_up_day	Cluster 1; R_up_night	Signaling.Hormone Signaling.Auxin Signaling.Auxin-mediated Signaling pathway	Signaling.Hormone Signaling.Auxin Signaling.Auxin responsive
VIT_16s0098g01230	Cytochrome b5	Cluster 1; R_up_day	Cluster 1; R_up_night	Unclear
VIT_16s0098g01380	Yippee	Cluster 1; R_up_day	Cluster 1; R_up_night	Unclear
VIT_16s0098g01860	ClpX	Cluster 1; R_up_day	Cluster 1; R_up_night	Metabolism.Primary metabolism.Protein metabolism and modification.Proteolysis.Peptidase proteins
VIT_16s0100g00120	No hit	Cluster 1; R_up_day	Cluster 1; R_up_night	No hit
VIT_16s0100g00130	Protein phosphatase 2C / PP2C	Cluster 1; R_up_day	Cluster 1; R_up_night	Signaling.Signaling pathway.Protein phosphatase.PP2C
VIT_16s0100g00150	COP9 signalosome complex subunit 5	Cluster 1; R_up_day	Cluster 1; R_up_night	Metabolism.Primary metabolism.Protein metabolism and modification.Proteolysis.cytoplasmic and nuclear protein degradation.Ubiquitin-mediated proteolysis.Deubiquitination
VIT_16s0100g00160	HMG-CoA synthase 2	Cluster 1; R_up_day	Cluster 1; R_up_night	Metabolism.Primary metabolism.Lipid metabolism.Synthesis and degradation of ketone bodies	Metabolism.Primary metabolism.Amino acid metabolism.Valine, leucine, and isoleucine metabolism.Valine, leucine, and isoleucine catabolism	Metabolism.Primary metabolism.Organic acid metabolism.Butanoate metabolism
VIT_16s0100g00390	AP2 domain-containing transcription factor TINY	Cluster 1; R_up_day	Cluster 1; R_up_night	Signaling.Hormone Signaling.Ethylene Signaling.Ethylene-mediated Signaling pathway	Regulation overview.Regulation of gene expression.Regulation of transcription.Transcription factor.AP2 family transcription factor.RAV subfamily transcription factor
VIT_16s0100g00400	Ethylene-responsive transcription factor ERF025	Cluster 1; R_up_day	Cluster 1; R_up_night	Signaling.Hormone Signaling.Ethylene Signaling.Ethylene-mediated Signaling pathway	Regulation overview.Regulation of gene expression.Regulation of transcription.Transcription factor.AP2 family transcription factor.DREB subfamily transcription factor
VIT_16s0100g00770	Stilbene synthase	Cluster 1; R_up_day	Cluster 1; R_up_night	Metabolism.Secondary metabolism.Phenylpropanoid metabolism.Phenylpropanoid biosynthesis	Metabolism.Cellular metabolism.Phytoalexin metabolism.Phytoalexin biosynthesis	Metabolism.Secondary metabolism.Phenylpropanoid metabolism.Stilbenoid metabolism.Stilbenoid biosynthesis
VIT_16s0100g01130	Stilbene synthase [Vitis vinifera]	Cluster 1; R_up_day	Cluster 1; R_up_night	Metabolism.Secondary metabolism.Phenylpropanoid metabolism.Phenylpropanoid biosynthesis	Metabolism.Cellular metabolism.Phytoalexin metabolism.Phytoalexin biosynthesis	Metabolism.Secondary metabolism.Phenylpropanoid metabolism.Stilbenoid metabolism.Stilbenoid biosynthesis
VIT_16s0100g01140	Stilbene synthase 2	Cluster 1; R_up_day	Cluster 1; R_up_night	Metabolism.Secondary metabolism.Phenylpropanoid metabolism.Phenylpropanoid biosynthesis	Metabolism.Cellular metabolism.Phytoalexin metabolism.Phytoalexin biosynthesis	Metabolism.Secondary metabolism.Phenylpropanoid metabolism.Stilbenoid metabolism.Stilbenoid biosynthesis
VIT_16s0100g01190	Stilbene synthase [Vitis vinifera]	Cluster 1; R_up_day	Cluster 1; R_up_night	Metabolism.Secondary metabolism.Phenylpropanoid metabolism.Phenylpropanoid biosynthesis	Metabolism.Cellular metabolism.Phytoalexin metabolism.Phytoalexin biosynthesis	Metabolism.Secondary metabolism.Phenylpropanoid metabolism.Stilbenoid metabolism.Stilbenoid biosynthesis
VIT_16s0100g01220	No hit	Cluster 1; R_up_day	Cluster 1; R_up_night	No hit
VIT_16s0115g00040	Glucose-6-phosphate isomerase	Cluster 1; R_up_day	Cluster 1; R_up_night	Metabolism.Primary metabolism.Carbohydrate metabolism.Glycolysis Gluconeogenesis	Metabolism.Primary metabolism.Carbohydrate metabolism.Monosaccharide metabolism.Monosaccharide catabolism.Pentose-phosphate shunt	Metabolism.Primary metabolism.Carbohydrate metabolism.Polysaccharide metabolism.Starch and sucrose metabolism
VIT_16s0115g00330	Translocation protein SEC62	Cluster 1; R_up_day	Cluster 1; R_up_night	Transport overview.Primary Active Transporters.P-P-bond hydrolysis-driven transporters.General Secretory Pathway (Sec)	Transport overview.Macromolecule transport.Protein transport	Cellular process.Cellular transport.Protein trafficking	Metabolism.Primary metabolism.Protein metabolism and modification.Protein processing in endoplasmic reticulum
VIT_16s0115g00470	Lucose inhibited division protein A	Cluster 1; R_up_day	Cluster 1; R_up_night	Metabolism.Primary metabolism.Nucleobase, nucleoside, nucleotide, nucleic acid metabolism.Nucleic acid metabolism.DNA metabolism.DNA recombination and repair.repair
VIT_16s0148g00010	Receptor kinase homolog LRK10	Cluster 1; R_up_day	Cluster 1; R_up_night	Signaling.Signaling pathway.Protein kinase
VIT_16s0148g00020	Ser/Thr receptor-like kinase1	Cluster 1; R_up_day	Cluster 1; R_up_night	Signaling.Signaling pathway.Protein kinase
VIT_16s0148g00100	Brassinosteroid insensitive 1-associated receptor kinase 1	Cluster 1; R_up_day	Cluster 1; R_up_night	Signaling.Hormone Signaling.Brassinosteroid Signaling.Brassinosteroid-mediated Signaling pathway
VIT_16s0148g00160	Receptor serine/threonine kinase	Cluster 1; R_up_day	Cluster 1; R_up_night	Signaling.Signaling pathway.Protein kinase
VIT_16s0148g00210	Receptor kinase homolog LRK10	Cluster 1; R_up_day	Cluster 1; R_up_night	Signaling.Signaling pathway.Protein kinase
VIT_16s0148g00270	No hit	Cluster 1; R_up_day	Cluster 1; R_up_night	No hit
VIT_16s0148g00290	Ser/Thr receptor-like kinase1	Cluster 1; R_up_day	Cluster 1; R_up_night	Signaling.Signaling pathway.Protein kinase
VIT_16s0148g00300	Receptor serine/threonine kinase	Cluster 1; R_up_day	Cluster 1; R_up_night	Signaling.Signaling pathway.Protein kinase
VIT_16s0148g00360	PR5K (PR5-like receptor kinase)	Cluster 1; R_up_day	Cluster 1; R_up_night	Signaling.Signaling pathway.Protein kinase
VIT_16s0148g00370	Receptor serine/threonine kinase	Cluster 1; R_up_day	Cluster 1; R_up_night	Signaling.Signaling pathway.Protein kinase
VIT_17s0000g00200	Ethylene-responsive transcription factor ERF114	Cluster 1; R_up_day	Cluster 1; R_up_night	Signaling.Hormone Signaling.Ethylene Signaling.Ethylene-mediated Signaling pathway	Regulation overview.Regulation of gene expression.Regulation of transcription.Transcription factor.AP2 family transcription factor.ERF subfamily transcription factor
VIT_17s0000g00400	Phosphate carrier protein	Cluster 1; R_up_day	Cluster 1; R_up_night	Transport overview.Electrochemical Potential-driven Transporters.Porters.Mitochondrial Carrier.Phosphate carrier	Transport overview.Mitochondrial membrane transport.Mitochondrial membrane phosphate transport
VIT_17s0000g00410	No hit	Cluster 1; R_up_day	Cluster 1; R_up_night	No hit
VIT_17s0000g00420	No hit	Cluster 1; R_up_day	Cluster 1; R_up_night	No hit
VIT_17s0000g00570	Unknown protein	Cluster 1; R_up_day	Cluster 1; R_up_night	Unknown
VIT_17s0000g01080	HVA22E (HVA22-like protein E)	Cluster 1; R_up_day	Cluster 1; R_up_night	Signaling.Hormone Signaling.ABA Signaling.ABA-mediated Signaling pathway
VIT_17s0000g01310	Acetohydroxyacid synthase 3	Cluster 1; R_up_day	Cluster 1; R_up_night	Metabolism.Primary metabolism.Amino acid metabolism.Valine, leucine, and isoleucine metabolism.Valine, leucine, and isoleucine biosynthesis	Metabolism.Primary metabolism.Organic acid metabolism.Butanoate metabolism	Metabolism.Primary metabolism.Coenzyme and prosthetic group metabolism.Pantothenate and CoA metabolism	Metabolism.Primary metabolism.Amino acid metabolism.Amino acid biosynthesis	Metabolism.Primary metabolism.Organic acid metabolism.Pyruvate fermentation
VIT_17s0000g01320	Acetohydroxyacid synthase 3	Cluster 1; R_up_day	Cluster 1; R_up_night	Metabolism.Primary metabolism.Amino acid metabolism.Valine, leucine, and isoleucine metabolism.Valine, leucine, and isoleucine biosynthesis	Metabolism.Primary metabolism.Organic acid metabolism.Butanoate metabolism	Metabolism.Primary metabolism.Coenzyme and prosthetic group metabolism.Pantothenate and CoA metabolism	Metabolism.Primary metabolism.Amino acid metabolism.Amino acid biosynthesis	Metabolism.Primary metabolism.Organic acid metabolism.Pyruvate fermentation
VIT_17s0000g01820	Malate synthase	Cluster 1; R_up_day	Cluster 1; R_up_night	Metabolism.Primary metabolism.Carbohydrate metabolism.Monosaccharide metabolism.Pyruvate metabolism	Metabolism.Primary metabolism.Generation of metabolite precursors and energy.Glyoxylate and dicarboxylate metabolism
VIT_17s0000g01910	Glutamine synthetase cytosolic isozyme 1	Cluster 1; R_up_day	Cluster 1; R_up_night	Metabolism.Primary metabolism.Amino acid metabolism.Glutamate metabolism	Metabolism.Primary metabolism.Carbohydrate metabolism.Oligosaccharide metabolism.Glycan metabolism.Peptidoglycan biosynthesis	Metabolism.Cellular metabolism.Nitrogen and sulfur metabolism.Nitrogen metabolism	Metabolism.Primary metabolism.Amino acid metabolism.Amino acid biosynthesis	Metabolism.Primary metabolism.Amino acid metabolism.Glutamine metabolism.Glutamine biosynthesis
VIT_17s0000g01930	Potassium transporter 2	Cluster 1; R_up_day	Cluster 1; R_up_night	Transport overview.Electrochemical Potential-driven Transporters.Porters.K+ uptake porter (aka permease)	Transport overview.Ion transport.Cation transport.Potassium transport
VIT_17s0000g01940	Homeobox protein knotted-1 like 1 (KNAT1)	Cluster 1; R_up_day	Cluster 1; R_up_night	Regulation overview.Regulation of gene expression.Regulation of transcription.Transcription factor.Homeobox domain family transcription factor
VIT_17s0000g01950	Dihydropyrimidine dehydrogenase	Cluster 1; R_up_day	Cluster 1; R_up_night	Metabolism.Primary metabolism.Amino acid metabolism.Beta-Alanine metabolism	Metabolism.Primary metabolism.Coenzyme and prosthetic group metabolism.Pantothenate and CoA metabolism.Pantothenate and CoA biosynthesis
VIT_17s0000g02140	3-hydroxyisobutyrate dehydrogenase	Cluster 1; R_up_day	Cluster 1; R_up_night	Metabolism.Primary metabolism.Amino acid metabolism.Valine, leucine, and isoleucine metabolism.Valine, leucine, and isoleucine catabolism	Metabolism.Primary metabolism.Amino acid metabolism.Amino acid catabolism
VIT_17s0000g02150	Ribosomal protein L19	Cluster 1; R_up_day	Cluster 1; R_up_night	Metabolism.Primary metabolism.Protein metabolism and modification.Protein synthesis.Ribosome
VIT_17s0000g02330	Receptor protein kinase	Cluster 1; R_up_day	Cluster 1; R_up_night	Signaling.Signaling pathway.Protein kinase
[truncated: 12,774 more rows]
